# Supplementary material for: Thiorhodovibrio frisius and Trv. litoralis spp. nov., Two Novel Members from a Clade of Fastidious Purple Sulfur Bacteria That Exhibit Unique Red-Shifted Light-Harvesting Capabilities
Source: MDPI journal article supplement (doi:10.3390/microorganisms11102394), 2023-09-25
Supplement: s1 [file s1]

**Table S7.** Genes of *Trv. frisius* DSM111777<sup>T</sup>, *Trv. winogradskyi* DSM 6702<sup>T</sup>, *Trv. litoralis* 06511<sup>T</sup> involved in sulfur metabolism annotated through KEGG, RAST, and manually. (1/3)

| Gene                                             | Description                                                             | KEGG code | <i>Trv. frisius</i> 006511 <sup>T</sup> | <i>Trv. winogradskyi</i> DSM 6702 <sup>T</sup> | <i>Trv. litoralis</i> stain 970 <sup>T</sup> |
|--------------------------------------------------|-------------------------------------------------------------------------|-----------|-----------------------------------------|------------------------------------------------|----------------------------------------------|
| <i>2Fe-2S iron-sulfur cluster</i>                | 2Fe-2S iron-sulfur cluster binding domain protein                       | -         | Thiofri_01465                           | Thiowin_02587                                  | Thiosp_03924                                 |
| <i>ABC transporter</i>                           | ABC transporter, substrate-binding protein, aliphatic sulfonates family | -         | Thiofri_02470                           | -                                              | -                                            |
| <i>aprM</i>                                      | adenylylsulfate reductase, putative membrane anchor                     | -         | Thiofri_03809                           | Thiowin_00432                                  | Thiosp_01612                                 |
| <i>aprB</i>                                      | adenylylsulfate reductase, subunit B                                    | K00395    | Thiofri_03808                           | Thiowin_00433                                  | Thiosp_01613                                 |
| <i>aprA</i>                                      | adenylylsulfate reductase, subunit A                                    | K00394    | Thiofri_03807                           | Thiowin_00434                                  | Thiosp_01614                                 |
| <i>Arylsulfatase</i>                             | Arylsulfatase                                                           | -         | Thiofri_02489                           | -                                              | Thiosp_04764                                 |
| <i>atsA 1</i>                                    | Arylsulfatase                                                           | -         | Thiofri_01662                           | Thiowin_01532                                  | Thiosp_03518                                 |
| <i>atsA 2</i>                                    | Arylsulfatase                                                           | -         | Thiofri_02024                           | Thiowin_04338                                  | Thiosp_04768                                 |
| <i>atsA 3</i>                                    | Arylsulfatase precursor                                                 | -         | Thiofri_02494                           | -                                              | -                                            |
| <i>atsB</i>                                      | Anaerobic sulfatase-maturing enzyme                                     | -         | Thiofri_03176                           | -                                              | -                                            |
| <i>bchL</i>                                      | ferredoxin:protochlorophyllide reductase, Fe-S ATP-binding protein      | -         | Thiofri_04154                           | Thiowin_00758                                  | Thiosp_00715                                 |
| <i>bcr 1</i>                                     | Sulfonamide resistance protein                                          | -         | Thiofri_03590                           | Thiowin_00679                                  | Thiosp_00849                                 |
| <i>bcr 2</i>                                     | Sulfonamide resistance protein                                          | -         | -                                       | -                                              | Thiosp_02057                                 |
| <i>chuR</i>                                      | Anaerobic sulfatase-maturing enzyme                                     | -         | Thiofri_01670                           | -                                              | -                                            |
| <i>cysA 1</i>                                    | Sulfate/thiosulfate import ATP-binding protein                          | K02045    | Thiofri_01536                           | Thiowin_04178                                  | Thiosp_02421                                 |
| <i>cysA 2</i>                                    | Sulfate/thiosulfate import ATP-binding protein                          | -         | Thiofri_02713                           | -                                              | -                                            |
| <i>cysC</i>                                      | Adenylyl-sulfate kinase                                                 | -         | -                                       | Thiowin_00440                                  | Thiosp_02505                                 |
| <i>cysE</i>                                      | serine O-acetyltransferase                                              | K00640    | Thiofri_04252                           | Thiowin_00261                                  | Thiosp_00506                                 |
| <i>cysH 1</i>                                    | Phosphoadenosine phosphosulfate reductase                               | -         | -                                       | Thiowin_04141                                  | Thiosp_02726                                 |
| <i>cysH 2</i>                                    | Phosphoadenosine phosphosulfate reductase                               | -         | -                                       | Thiowin_04146                                  | -                                            |
| <i>ddhA</i>                                      | Dimethylsulfide dehydrogenase subunit alpha precursor                   | -         | -                                       | -                                              | Thiosp_04187                                 |
| <i>disulfide bond B</i>                          | disulfide bond formation protein B                                      | -         | -                                       | Thiowin_01987                                  | -                                            |
| <i>dsbA 1</i>                                    | Thiol:disulfide interchange protein precursor                           | -         | Thiofri_00685                           | Thiowin_01988                                  | Thiosp_01192                                 |
| <i>dsbA 2</i>                                    | Thiol:disulfide interchange protein precursor                           | -         | Thiofri_03576                           | Thiowin_02628                                  | Thiosp_04608                                 |
| <i>dsbB</i>                                      | Disulfide oxidoreductase                                                | -         | Thiofri_00683                           | -                                              | Thiosp_04609                                 |
| <i>dsbC</i>                                      | Thiol:disulfide interchange protein precursor                           | -         | Thiofri_02780                           | Thiowin_01861                                  | Thiosp_02390                                 |
| <i>dsbD 1</i>                                    | Thiol:disulfide interchange protein precursor                           | -         | Thiofri_01064                           | Thiowin_00530                                  | Thiosp_00809                                 |
| <i>dsbD 2</i>                                    | Thiol:disulfide interchange protein precursor                           | -         | Thiofri_03598                           | Thiowin_01631                                  | Thiosp_01176                                 |
| <i>dsrA</i>                                      | dissimilatory sulfite reductase alpha subunit                           | K11180    | Thiofri_03979                           | Thiowin_00378                                  | Thiosp_04058                                 |
| <i>dsrB</i>                                      | dissimilatory sulfite reductase beta subunit                            | K11181    | Thiofri_03978                           | Thiowin_00379                                  | Thiosp_04057                                 |
| <i>dsrC</i>                                      | Intracellular sulfur oxidation protein                                  | -         | Thiofri_03977                           | Thiowin_00380                                  | Thiosp_04056                                 |
| <i>dsrE</i>                                      | Putative sulfurtransferase                                              | -         | Thiofri_03977                           | Thiowin_00380                                  | Thiosp_04056                                 |
| <i>dsrF</i>                                      | Intracellular sulfur oxidation protein                                  | -         | Thiofri_03976                           | Thiowin_00381                                  | Thiosp_04055                                 |
| <i>dsrH</i>                                      | Intracellular sulfur oxidation protein                                  | -         | Thiofri_03974                           | Thiowin_00383                                  | Thiosp_04053                                 |
| <i>dsrM</i>                                      | Intracellular sulfur oxidation protein                                  | -         | Thiofri_03972                           | Thiowin_00385                                  | Thiosp_04051                                 |
| <i>dsrK</i>                                      | Intracellular sulfur oxidation protein                                  | -         | Thiofri_03971                           | Thiowin_00386                                  | Thiosp_04050                                 |
| <i>dsrL</i>                                      | Intracellular sulfur oxidation protein                                  | -         | Thiofri_03970                           | Thiowin_00387                                  | Thiosp_04049                                 |
| <i>dsrJ</i>                                      | Intracellular sulfur oxidation protein                                  | -         | Thiofri_03969                           | Thiowin_00388                                  | Thiosp_04048                                 |
| <i>dsrO</i>                                      | Intracellular sulfur oxidation protein                                  | -         | Thiofri_03968                           | Thiowin_00389                                  | Thiosp_04047                                 |
| <i>dsrP</i>                                      | Intracellular sulfur oxidation protein                                  | -         | Thiofri_03967                           | Thiowin_00390                                  | Thiosp_04046                                 |
| <i>dsrN</i>                                      | Intracellular sulfur oxidation protein                                  | -         | Thiofri_03966                           | Thiowin_00391                                  | Thiosp_04045                                 |
| <i>dsrR</i>                                      | Intracellular sulfur oxidation protein                                  | -         | Thiofri_03965                           | Thiowin_00392                                  | Thiosp_04044                                 |
| <i>dsrS</i>                                      | Intracellular sulfur oxidation protein                                  | -         | Thiofri_03964                           | Thiowin_00393                                  | Thiosp_04043                                 |
| <i>erpA 1</i>                                    | Iron-sulfur cluster insertion protein ErpA                              | -         | Thiofri_01419                           | Thiowin_00786                                  | Thiosp_01240                                 |
| <i>erpA 2</i>                                    | Iron-sulfur cluster insertion protein ErpA                              | -         | Thiofri_01422                           | Thiowin_00789                                  | Thiosp_01243                                 |
| <i>fccB 1</i>                                    | Sulfide dehydrogenase [flavocytochrome c] flavoprotein chain precursor  | K17229    | Thiofri_00955                           | Thiowin_03811                                  | Thiosp_00360                                 |
| <i>fccB 2</i>                                    | Sulfide dehydrogenase [flavocytochrome c] flavoprotein chain precursor  | K17229    | Thiofri_04639                           | Thiowin_04304                                  | Thiosp_00839                                 |
| <i>fccB 3</i>                                    | Sulfide dehydrogenase [flavocytochrome c] flavoprotein chain precursor  | K17229    | -                                       | Thiowin_04954                                  | Thiosp_01680                                 |
| <i>fccA</i>                                      | cytochrome subunit of sulfide dehydrogenase                             | K17230    | Thiofri_04640                           | Thiowin_03812<br>Thiowin_04953                 | Thiosp_00359<br>Thiosp_00840<br>Thiosp_01681 |
| <i>Formylglycine-generating sulfatase enzyme</i> | Formylglycine-generating sulfatase enzyme                               | -         | Thiofri_01195                           | -                                              | -                                            |
| <i>frdB</i>                                      | Fumarate reductase iron-sulfur subunit                                  | -         | Thiofri_02433                           | Thiowin_02199                                  | Thiosp_02570                                 |
| <i>glpE 1</i>                                    | Thiosulfate sulfurtransferase                                           | -         | -                                       | Thiowin_01009                                  | Thiosp_00285                                 |
| <i>glpE 2</i>                                    | Thiosulfate sulfurtransferase                                           | -         | -                                       | Thiowin_04777                                  | Thiosp_03227                                 |
| <i>Glycolipid sulfotransferase 1</i>             | Glycolipid sulfotransferase                                             | -         | Thiofri_03329                           | Thiowin_01553                                  | Thiosp_03079                                 |
| <i>Glycolipid sulfotransferase 2</i>             | Glycolipid sulfotransferase                                             | -         | Thiofri_02084                           | -                                              | -                                            |
| <i>Glycolipid sulfotransferase 3</i>             | Glycolipid sulfotransferase                                             | -         | Thiofri_03154                           | -                                              | -                                            |
| <i>Glycolipid sulfotransferase 4</i>             | Glycolipid sulfotransferase                                             | -         | Thiofri_03431                           | -                                              | -                                            |
| <i>hip</i>                                       | High-potential iron-sulfur protein precursor                            | -         | Thiofri_01507                           | Thiowin_03612                                  | Thiosp_02354                                 |

**Table S7. (continued 2/3)**

| Gene                                                | Description                                                    | KEGG code | Trv. <i>frisius</i> 006511 <sup>T</sup> | Trv. <i>winogradskyi</i> DSM 6702 <sup>T</sup> | Trv. <i>litoralis</i> stain 970 <sup>T</sup> |
|-----------------------------------------------------|----------------------------------------------------------------|-----------|-----------------------------------------|------------------------------------------------|----------------------------------------------|
| <i>Fe-S cluster repair di-iron protein</i>          | iron-sulfur cluster repair di-iron protein                     | -         | -                                       | -                                              | Thiosp_01675                                 |
| <i>iscA</i>                                         | Iron-sulfur cluster assembly protein                           | -         | Thiofri_04618                           | Thiowin_05010                                  | Thiosp_00251                                 |
| <i>metA</i>                                         | homoserine O-succinyltransferase/O-acetyltransferase           | K00651    | Thiofri_03616                           | Thiowin_04204                                  | Thiosp_01598                                 |
| <i>metZ</i>                                         | O-succinylhomoserine sulphydrylase                             | K10764    | Thiofri_02417                           | Thiowin_01920                                  | Thiosp_02563                                 |
| <i>moaD</i>                                         | Sulfur carrier protein                                         | -         | Thiofri_02058                           | Thiowin_03805                                  | Thiosp_02808                                 |
| <i>moeZ 1</i>                                       | putative adenyltransferase/sulfurtransferase                   | -         | Thiofri_01145                           | Thiowin_03616                                  | Thiosp_01781                                 |
| <i>moeZ 2</i>                                       | putative adenyltransferase/sulfurtransferase                   | -         | Thiofri_01505                           | Thiowin_03952                                  | Thiosp_01810                                 |
| <i>moeZ 3</i>                                       | putative adenyltransferase/sulfurtransferase                   | -         | Thiofri_01904                           | Thiowin_04257                                  | Thiosp_02523                                 |
| <i>moeZ 4</i>                                       | putative adenyltransferase/sulfurtransferase                   | -         | Thiofri_03751                           | -                                              | Thiosp_03134                                 |
| <i>moeZ 5</i>                                       | putative adenyltransferase/sulfurtransferase                   | -         | -                                       | -                                              | Thiosp_03275                                 |
| <i>msrA 1</i>                                       | Peptide methionine sulfoxide reductase                         | -         | Thiofri_04119                           | Thiowin_04189                                  | Thiosp_00058                                 |
| <i>msrA 2</i>                                       | Peptide methionine sulfoxide reductase                         | -         | Thiofri_04910                           | Thiowin_04645                                  | Thiosp_01071                                 |
| <i>msrB</i>                                         | Peptide methionine sulfoxide reductase                         | -         | Thiofri_02674                           | Thiowin_01774                                  | Thiosp_03006                                 |
| <i>nifS</i>                                         | Cysteine desulfurase                                           | -         | Thiofri_03253                           | Thiowin_02439                                  | -                                            |
| <i>petA</i>                                         | Ubiquinol-cytochrome c reductase iron-sulfur subunit           | -         | Thiofri_00562                           | Thiowin_01122                                  | Thiosp_00461                                 |
| <i>phsC</i>                                         | thiosulfate reductase cytochrome b subunit                     | K08354    | Thiofri_01459                           | Thiowin_02593                                  | Thiosp_03930                                 |
| <i>pspE</i>                                         | Thiosulfate sulfurtransferase PspE precursor                   | -         | Thiofri_04596                           | -                                              | -                                            |
| <i>psrA</i>                                         | Sulfur reductase chain A                                       | -         | Thiofri_00885                           | -                                              | -                                            |
| <i>isomerase 1</i>                                  | Protein-disulfide isomerase                                    | -         | -                                       | -                                              | Thiosp_02174                                 |
| <i>isomerase 2</i>                                  | Protein-disulfide isomerase                                    | -         | -                                       | -                                              | Thiosp_03113                                 |
| <i>putative iron-sulfur cluster-binding protein</i> | putative iron-sulfur cluster-binding protein                   | -         | -                                       | -                                              | Thiosp_01691                                 |
| <i>cysZ</i>                                         | putative sulfate transport protein                             | -         | Thiofri_02456                           | -                                              | Thiosp_00022                                 |
| <i>putative sulfate transporter</i>                 | putative sulfate transporter                                   | -         | Thiofri_04214                           | Thiowin_04056                                  | Thiosp_00922                                 |
| <i>putative sulfate transporter</i>                 | putative sulfate transporter                                   | -         | Thiofri_02282                           | Thiowin_03509                                  | Thiosp_03919                                 |
| <i>putative sulfate transporter</i>                 | putative sulfate transporter                                   | -         | -                                       | -                                              | Thiosp_04749                                 |
| <i>dndC</i>                                         | putative sulfurtransferase                                     | -         | -                                       | -                                              | Thiosp_02750                                 |
| <i>sqrD</i>                                         | sulfide:quinone oxidoreductase                                 | K17218    | Thiofri_01966                           | Thiowin_01274                                  | Thiosp_02348                                 |
| <i>sqrF</i>                                         | sulfide:quinone oxidoreductase                                 | K17218    | Thiofri_02206                           | Thiowin_02851                                  | Thiosp_01541                                 |
| <i>soeA</i>                                         | sulfite dehydrogenase (quinone) subunit A                      | K21307    | Thiofri_03816                           | Thiowin_04202                                  | Thiosp_01600                                 |
| <i>soeB</i>                                         | sulfite dehydrogenase (quinone) subunit B                      | K21308    | Thiofri_03815                           | Thiowin_04201                                  | Thiosp_01601                                 |
| <i>soeC</i>                                         | sulfite dehydrogenase (quinone) subunit C                      | K21309    | Thiofri_03814                           | Thiowin_04200                                  | Thiosp_01602                                 |
| <i>soxA</i>                                         | L-cysteine S-thiosulfotransferase                              | K17222    | -                                       | -                                              | Thiosp_02372                                 |
| <i>soxX</i>                                         | L-cysteine S-thiosulfotransferase                              | K17223    | -                                       | -                                              | Thiosp_02371                                 |
| <i>soxB</i>                                         | S-sulfosulfanyl-L-cysteine sulfohydrolase                      | K17224    | -                                       | -                                              | Thiosp_02368                                 |
| <i>SoxY</i>                                         | sulfur oxidation protein                                       | K17226    | Thiofri_04248                           | Thiowin_00257                                  | Thiosp_00502                                 |
| <i>soxZ</i>                                         | sulfur-oxidizing protein                                       | K17227    | Thiofri_04249                           | Thiowin_00258                                  | Thiosp_00503                                 |
| <i>redox-active disulfide protein 2</i>             | redox-active disulfide protein 2                               | -         | Thiofri_01884                           | Thiowin_00948                                  | Thiosp_04292                                 |
| <i>redox-active disulfide protein 2</i>             | redox-active disulfide protein 2                               | -         | Thiofri_03863                           | Thiowin_02022                                  | -                                            |
| <i>resA</i>                                         | Thiol-disulfide oxidoreductase                                 | -         | Thiofri_01233                           | Thiowin_02240                                  | Thiosp_01220                                 |
| <i>rhdA</i>                                         | Thiosulfate sulfurtransferase                                  | -         | -                                       | Thiowin_01548                                  | -                                            |
| <i>sat</i>                                          | Sulfate adenyltransferase                                      | K00958    | Thiofri_03810                           | Thiowin_00431                                  | Thiosp_01611                                 |
| <i>sdhC</i>                                         | Succinate dehydrogenase                                        | -         | Thiofri_03070                           | Thiowin_01091                                  | Thiosp_03026                                 |
| <i>sdhD</i>                                         | Succinate dehydrogenase                                        | -         | Thiofri_03071                           | Thiowin_01092                                  | Thiosp_03027                                 |
| <i>sdhA</i>                                         | Succinate dehydrogenase                                        | -         | Thiofri_03072                           | Thiowin_01093                                  | Thiosp_03028                                 |
| <i>sdhB</i>                                         | Succinate dehydrogenase iron-sulfur subunit                    | -         | Thiofri_03073                           | Thiowin_01094                                  | Thiosp_03029                                 |
| <i>sgpA 1</i>                                       | Sulfur globule protein CV1 precursor                           | -         | Thiofri_01608                           | Thiowin_00268                                  | -                                            |
| <i>sgpA 2</i>                                       | Sulfur globule protein CV1 precursor                           | -         | Thiofri_04295                           | Thiowin_02802                                  | -                                            |
| <i>sseA</i>                                         | 3-mercaptopyruvate sulfurtransferase                           | -         | Thiofri_01914                           | -                                              | -                                            |
| <i>iron-sulfur subunit reductase 1</i>              | succinate dehydrogenase/fumarate reductase iron-sulfur subunit | -         | Thiofri_03972                           | Thiowin_00540                                  | Thiosp_01888                                 |
| <i>iron-sulfur subunit reductase 2</i>              | succinate dehydrogenase/fumarate reductase iron-sulfur subunit | -         | Thiofri_02925                           | Thiowin_03147                                  | -                                            |
| <i>suFe 1</i>                                       | Cysteine desulfuration protein                                 | -         | Thiofri_00626                           | Thiowin_00610                                  | Thiosp_00250                                 |
| <i>suFe 2</i>                                       | Cysteine desulfuration protein                                 | -         | Thiofri_04617                           | Thiowin_05011                                  | Thiosp_04458                                 |
| <i>Sulfite exporter TauE/SafE</i>                   | Sulfite exporter                                               | -         | Thiofri_02039                           | Thiowin_03913                                  | Thiosp_01779                                 |
| <i>Sulfotransferase domain protein</i>              | Sulfotransferase domain protein                                | -         | Thiofri_00084                           | Thiowin_00890                                  | Thiosp_00745                                 |
| <i>Sulfotransferase domain protein</i>              | Sulfotransferase domain protein                                | -         | Thiofri_03647                           | -                                              | Thiosp_01275                                 |
| <i>Sulfotransferase domain protein</i>              | Sulfotransferase domain protein                                | -         | Thiofri_03635                           | -                                              | Thiosp_01307                                 |
| <i>Sulfotransferase domain protein</i>              | Sulfotransferase domain protein                                | -         | Thiofri_00082                           | -                                              | -                                            |
| <i>Sulfotransferase domain protein</i>              | Sulfotransferase domain protein                                | -         | Thiofri_03646                           | -                                              | -                                            |
| <i>Sulfotransferase family protein</i>              | Sulfotransferase family protein                                | -         | Thiofri_01058                           | Thiowin_04831                                  | Thiosp_00805                                 |
| <i>Sulfotransferase family protein</i>              | Sulfotransferase family protein                                | -         | Thiofri_04087                           | -                                              | -                                            |
| <i>Sulfur oxygenase reductase</i>                   | Sulfur oxygenase reductase                                     | -         | -                                       | -                                              | Thiosp_00861                                 |
| <i>TusD/DsrE 1</i>                                  | sulfur relay protein                                           | -         | -                                       | Thiowin_02441                                  | -                                            |
| <i>TusD/DsrE 2</i>                                  | sulfur relay protein                                           | -         | -                                       | Thiowin_02484                                  | -                                            |
| <i>TusE/DsrC/DsvC</i>                               | sulfur relay protein, TusE/DsrC/DsvC family                    | -         | -                                       | Thiowin_03470                                  | -                                            |
| <i>thiF</i>                                         | Sulfur carrier protein ThiS adenyltransferase                  | -         | Thiofri_03134                           | Thiowin_01051                                  | -                                            |

**Table S7.** (continued 3/3)

| Gene                                              | Description                                | KEGG code | Trv. <i>frisius</i> 006511 <sup>T</sup> | Trv. <i>winogradskyi</i> DSM 6702 <sup>T</sup> | Trv. <i>litoralis</i> stain 970 <sup>T</sup> |
|---------------------------------------------------|--------------------------------------------|-----------|-----------------------------------------|------------------------------------------------|----------------------------------------------|
| <i>thiol-disulfide oxidoreductase</i>             | thiol-disulfide oxidoreductase             | -         | Thiofri_04208                           | Thiowin_04049                                  | Thiosp_00810                                 |
| <i>thiol-disulfide oxidoreductase</i>             | thiol-disulfide oxidoreductase             | -         | -                                       | -                                              | Thiosp_00929                                 |
| <i>thiosulfate reductase cytochrome B subunit</i> | thiosulfate reductase cytochrome B subunit | -         | Thiofri_01577                           | Thiowin_02836                                  | Thiosp_02858                                 |
| <i>thiosulfate reductase cytochrome B subunit</i> | thiosulfate reductase cytochrome B subunit | -         | Thiofri_01459                           | Thiowin_02593                                  | Thiosp_03930                                 |
| <i>thiosulfate sulfurtransferase</i>              | thiosulfate sulfurtransferase              | -         | Thiofri_01783                           | Thiowin_02412                                  | Thiosp_03786                                 |
| <i>thiosulfate sulfurtransferase</i>              | thiosulfate sulfurtransferase              | -         | -                                       | -                                              | Thiosp_04325                                 |
| <i>ttrB</i>                                       | tetrathionate reductase subunit B          | K08358    | Thiofri_03969                           | Thiowin_00388                                  | Thiosp_04048                                 |
| <i>tusA</i>                                       | Sulfurtransferase                          | -         | Thiofri_03750                           | Thiowin_02127                                  | Thiosp_03274                                 |
| <i>tusE 1</i>                                     | Sulfurtransferase                          | -         | Thiofri_02930                           | Thiowin_00374                                  | Thiosp_00391                                 |
| <i>tusE 2</i>                                     | Sulfurtransferase                          | -         | Thiofri_03019                           | Thiowin_00383                                  | Thiosp_01069                                 |
| <i>tusE 3</i>                                     | Sulfurtransferase                          | -         | Thiofri_03974                           | Thiowin_01425                                  | Thiosp_01672                                 |
| <i>tusE 4</i>                                     | Sulfurtransferase                          | -         | Thiofri_03983                           | Thiowin_01970                                  | Thiosp_03114                                 |
| <i>tusE 5</i>                                     | Sulfurtransferase                          | -         | -                                       | Thiowin_01971                                  | Thiosp_03194                                 |
| <i>tusE 6</i>                                     | Sulfurtransferase                          | -         | -                                       | Thiowin_01990                                  | Thiosp_03228                                 |
| <i>tusE 7</i>                                     | Sulfurtransferase                          | -         | -                                       | Thiowin_03145                                  | Thiosp_03279                                 |
| <i>tusE 8</i>                                     | Sulfurtransferase                          | -         | -                                       | Thiowin_03310                                  | Thiosp_03380                                 |
| <i>tusE 9</i>                                     | Sulfurtransferase                          | -         | -                                       | Thiowin_03810                                  | Thiosp_04053                                 |
| <i>tusE 10</i>                                    | Sulfurtransferase                          | -         | -                                       | -                                              | Thiosp_04063                                 |
| <i>ydeM 1</i>                                     | Anaerobic sulfatase-maturing enzyme        | -         | -                                       | Thiowin_01440                                  | Thiosp_03823                                 |
| <i>ydeM 2</i>                                     | Anaerobic sulfatase-maturing enzyme        | -         | -                                       | -                                              | Thiosp_04706                                 |
| <i>ydeM 3</i>                                     | Anaerobic sulfatase-maturing enzyme        | -         | -                                       | -                                              | Thiosp_04736                                 |

**Table S8.** Hydrogenases related genes of *Thiorhodovibrio* spp.

| Gene                       | Description                                              | Trv.<br><i>frisius</i><br>006511 <sup>T</sup> | Trv.<br><i>winogradskyi</i><br>DSM 6702 <sup>T</sup> | Trv.<br><i>litoralis</i> stain<br>970 <sup>T</sup> |
|----------------------------|----------------------------------------------------------|-----------------------------------------------|------------------------------------------------------|----------------------------------------------------|
| <i>Coenzyme F420b</i>      | Reducing hydrogenase, subunit beta                       | Thiofri_01984                                 | Thiowin_01243                                        | Thiosp_02229                                       |
| <i>Coenzyme F420a</i>      | Reducing hydrogenase, alpha subunit                      | Thiofri_02317                                 | Thiowin_01546                                        | Thiosp_02302                                       |
| <i>hndA</i>                | NADP-reducing hydrogenase subunit HndA                   | Thiofri_01447                                 | Thiowin_02604                                        | Thiosp_03940                                       |
| <i>hndC</i>                | NADP-reducing hydrogenase subunit HndC                   | Thiofri_01446                                 | Thiowin_02605                                        | Thiosp_03941                                       |
| <i>hndD</i>                | NADP-reducing hydrogenase subunit HndC                   | Thiofri_01445                                 | Thiowin_02607                                        | Thiosp_03943                                       |
| <i>hoxG</i>                | Uptake hydrogenase large subunit                         | -                                             | Thiowin_04278                                        | Thiosp_04182                                       |
| <i>hoxH</i>                | NAD-reducing hydrogenase HoxS subunit beta               | Thiofri_01443                                 | Thiowin_02609                                        | Thiosp_03945                                       |
| <i>hoxK 1</i>              | Uptake hydrogenase small subunit precursor               | Thiofri_00584                                 | Thiowin_00538                                        | Thiosp_01890                                       |
| <i>hoxK 2</i>              | Uptake hydrogenase small subunit precursor               | Thiofri_02923                                 | Thiowin_03149                                        | Thiosp_04181                                       |
| <i>hoxK 3</i>              | Uptake hydrogenase small subunit precursor               | -                                             | Thiowin_04277                                        | -                                                  |
| <i>hoxY</i>                | NAD-reducing hydrogenase HoxS subunit delta              | Thiofri_01444                                 | Thiowin_02608                                        | Thiosp_03944                                       |
| <i>hupC 1</i>              | Putative Ni/Fe-hydrogenase B-type cytochrome subunit     | Thiofri_00586                                 | Thiowin_04279                                        | Thiosp_04183                                       |
| <i>hupC 2</i>              | Putative Ni/Fe-hydrogenase B-type cytochrome subunit     | Thiofri_00605                                 | Thiowin_04325                                        | Thiosp_04453                                       |
| <i>hyaB 1</i>              | Hydrogenase-1 large chain                                | Thiofri_00585                                 | Thiowin_00541                                        | Thiosp_01887                                       |
| <i>hyaB 2</i>              | Hydrogenase-1 large chain                                | Thiofri_02926                                 | Thiowin_03146                                        | Thiosp_02759                                       |
| <i>hyaC</i>                | Putative Ni/Fe-hydrogenase 1 B-type cytochrome subunit   | Thiofri_02696                                 | Thiowin_03157                                        | Thiosp_02350                                       |
| <i>hybB</i>                | Putative Ni/Fe-hydrogenase 2 b-type cytochrome subunit   | Thiofri_01455                                 | Thiowin_02597                                        | Thiosp_03934                                       |
| <i>hybC 1</i>              | Hydrogenase-2 large chain precursor                      | Thiofri_01454                                 | Thiowin_02598                                        | Thiosp_03935                                       |
| <i>hybC 2</i>              | Hydrogenase-2 large chain precursor                      | -                                             | -                                                    | Thiosp_04191                                       |
| <i>hybD 1</i>              | Hydrogenase 2 maturation protease                        | Thiofri_00587                                 | Thiowin_02599                                        | Thiosp_03936                                       |
| <i>hybD 2</i>              | Hydrogenase 2 maturation protease                        | Thiofri_00608                                 | Thiowin_04280                                        | Thiosp_04184                                       |
| <i>hybD 3</i>              | Hydrogenase 2 maturation protease                        | Thiofri_01221                                 | -                                                    | -                                                  |
| <i>hybD 4</i>              | Hydrogenase 2 maturation protease                        | Thiofri_01453                                 | -                                                    | -                                                  |
| <i>hybO</i>                | Hydrogenase-2 small chain precursor                      | Thiofri_01457                                 | Thiowin_02595                                        | Thiosp_03932                                       |
| <i>hydrogenase 3</i>       | Hydrogenase 3 maturation protease                        | Thiofri_01442                                 | Thiowin_02610                                        | Thiosp_03946                                       |
| <i>hydrogenase</i>         | Hydrogenase assembly chaperone                           | Thiofri_04418                                 | Thiowin_00323                                        | -                                                  |
| <i>hydrogenase</i>         | Hydrogenase nickel incorporation protein                 | Thiofri_04882                                 | -                                                    | Thiosp_00099                                       |
| <i>hyfB 1</i>              | Hydrogenase-4 component B                                | Thiofri_04365                                 | Thiowin_00048                                        | Thiosp_00423                                       |
| <i>hyfB 2</i>              | Hydrogenase-4 component B                                | Thiofri_04366                                 | Thiowin_01315                                        | Thiosp_00424                                       |
| <i>hyfB 3</i>              | Hydrogenase-4 component B                                | Thiofri_04367                                 | Thiowin_01316                                        | Thiosp_00425                                       |
| <i>hyfB 4</i>              | Hydrogenase-4 component B                                | -                                             | Thiowin_01317                                        | -                                                  |
| <i>hynB1</i>               | Periplasmic [NiFe] hydrogenase small subunit 1 precursor | -                                             | -                                                    | Thiosp_02758                                       |
| <i>hypA</i>                | Hydrogenase/urease nickel incorporation                  | -                                             | Thiowin_04705                                        | -                                                  |
| <i>hypB</i>                | Hydrogenase isoenzymes nickel incorporation              | Thiofri_04923                                 | Thiowin_04659                                        | Thiosp_00072                                       |
| <i>hypC 1</i>              | Hydrogenase isoenzymes formation protein                 | Thiofri_02316                                 | Thiowin_01241                                        | Thiosp_03280                                       |
| <i>hypC 2</i>              | Hydrogenase isoenzymes formation protein                 | -                                             | -                                                    | Thiosp_04364                                       |
| <i>hypD</i>                | Hydrogenase expression/formation protein                 | Thiofri_02315                                 | Thiowin_01240                                        | Thiosp_03281                                       |
| <i>hypE</i>                | Hydrogenase expression/formation protein                 | Thiofri_02314                                 | Thiowin_01239                                        | Thiosp_03282                                       |
| <i>Ni/Fe-hydrogenase</i>   | <i>b</i> -type cytochrome subunit                        | -                                             | Thiowin_02554                                        | -                                                  |
| <i>Soluble hydrogenase</i> | 42 kDa subunit                                           | Thiofri_03672                                 | -                                                    | -                                                  |

**Table S9.** Genes of *Trv. frisius* DSM111777<sup>T</sup>, *Trv. winogradskyi* DSM 6702<sup>T</sup>, *Trv. litoralis* 06511<sup>T</sup> involved in carbon metabolism annotated through KEGG online database.

| Gene                   | Description                                               | KO code | <i>Trv. frisius</i> 006511 <sup>T</sup>     | <i>Trv. winogradskyi</i> DSM 6702 <sup>T</sup>             | <i>Trv. litoralis</i> stain 970 <sup>T</sup> |
|------------------------|-----------------------------------------------------------|---------|---------------------------------------------|------------------------------------------------------------|----------------------------------------------|
| <i>IDH1, IDH2, icd</i> | isocitrate dehydrogenase                                  | K00031  | Thiofri_01855                               | Thiowin_01731                                              | Thiosp_03395                                 |
| <i>sdhA, frdA</i>      | succinate dehydrogenase flavoprotein subunit              | K00239  | Thiofri_02434, Thiofri_03072                | Thiowin_01093, Thiowin_02200                               | Thiosp_02571, Thiosp_03028                   |
| <i>sdhB, frdB</i>      | succinate dehydrogenase iron-sulfur subunit               | K00240  | Thiofri_02433, Thiofri_03073                | Thiowin_01094                                              | Thiosp_02570, Thiosp_03029                   |
| <i>sdhC, frdC</i>      | succinate dehydrogenase cytochrome b subunit              | K00241  | Thiofri_03070                               | Thiowin_01091                                              | Thiosp_03026                                 |
| <i>sdhD, frdD</i>      | succinate dehydrogenase membrane anchor subunit           | K00242  | Thiofri_03071                               | Thiowin_01092                                              | Thiosp_03027                                 |
| <i>metF, MTHFR</i>     | methylenetetrahydrofolate reductase (NADH)                | K00297  | Thiofri_04212                               | Thiowin_04055                                              | Thiosp_00923                                 |
| <i>ackA</i>            | acetate kinase                                            | K00925  | Thiofri_02256                               | Thiowin_03935                                              | Thiosp_03554                                 |
| <i>ppdK</i>            | pyruvate, orthophosphate dikinase                         | K01006  | Thiofri_02310                               | Thiowin_01234                                              | Thiosp_03286                                 |
| <i>pps, ppsA</i>       | pyruvate, water dikinase                                  | K01007  | Thiofri_04696                               | Thiowin_03492, Thiowin_04722                               | Thiosp_04666                                 |
| <i>fold</i>            | methylenetetrahydrofolate dehydrogenase (NADP+)           | K01491  | Thiofri_02694                               | Thiowin_01484                                              | Thiosp_02352                                 |
| <i>ppc</i>             | phosphoenolpyruvate carboxylase                           | K01595  | Thiofri_01788                               | Thiowin_02645                                              | Thiosp_01620                                 |
| <i>fumA, fumB</i>      | fumarate hydratase, class I                               | K01676  | Thiofri_01973                               | Thiowin_01540                                              | Thiosp_02230                                 |
| <i>ACO, acnA</i>       | aconitate hydratase                                       | K01681  | Thiofri_04001                               | Thiowin_04240                                              | Thiosp_01407                                 |
| <i>acs</i>             | acetyl-CoA synthetase                                     | K01895  | Thiofri_03923                               | Thiowin_02135                                              | Thiosp_03629                                 |
| <i>sucD</i>            | succinyl-CoA synthetase alpha subunit                     | K01902  | Thiofri_04775                               | Thiowin_05000                                              | Thiosp_00129                                 |
| <i>sucC</i>            | succinyl-CoA synthetase beta subunit                      | K01903  | Thiofri_04776                               | Thiowin_05001                                              | Thiosp_00130                                 |
| <i>accC</i>            | acetyl-CoA carboxylase, biotin carboxylase subunit        | K01961  | Thiofri_03602                               | Thiowin_01627                                              | Thiosp_01172                                 |
| <i>accA</i>            | acetyl-CoA carboxylase carboxyl transferase subunit alpha | K01962  | Thiofri_01789                               | Thiowin_02644                                              | Thiosp_01621                                 |
| <i>accD</i>            | acetyl-CoA carboxylase carboxyl transferase subunit beta  | K01963  | Thiofri_02412                               | Thiowin_01915                                              | Thiosp_02558                                 |
| <i>accB, bccP</i>      | acetyl-CoA carboxylase biotin carboxyl carrier protein    | K02160  | Thiofri_03601                               | Thiowin_01628                                              | Thiosp_01173                                 |
| <i>por, nifJ</i>       | pyruvate-ferredoxin/flavodoxin oxidoreductase             | K03737  | Thiofri_01572                               | Thiowin_02842                                              | Thiosp_01649                                 |
| <i>pta</i>             | phosphate acetyltransferase                               | K13788  | Thiofri_02257                               | Thiowin_03934                                              | Thiosp_03553                                 |
| <i>maeB</i>            | malate dehydrogenase                                      | K00029  | Thiofri_04337                               | Thiowin_00275                                              | Thiosp_00363                                 |
| <i>GAPDH, gapA</i>     | glyceraldehyde 3-phosphate dehydrogenase                  | K00134  | Thiofri_01882, Thiofri_03859, Thiofri_04206 | Thiowin_02026, Thiowin_04047                               | Thiosp_00075, Thiosp_00931                   |
| <i>tktA, tktB</i>      | transketolase                                             | K00615  | Thiofri_04207                               | Thiowin_01514, Thiowin_03464, Thiowin_04048                | Thiosp_00930, Thiosp_03193                   |
| <i>prkB</i>            | phosphoribulokinase                                       | K00855  | Thiofri_00011                               | Thiowin_00010                                              | Thiosp_00011                                 |
| <i>pgk</i>             | phosphoglycerate kinase                                   | K00927  | Thiofri_04204                               | Thiowin_04046                                              | Thiosp_00932                                 |
| <i>ppdK</i>            | pyruvate, orthophosphate dikinase                         | K01006  | Thiofri_02310                               | Thiowin_01234                                              | Thiosp_03286                                 |
| <i>ppc</i>             | phosphoenolpyruvate carboxylase                           | K01595  | Thiofri_01788                               | Thiowin_02645                                              | Thiosp_01620                                 |
| <i>rbcL, cbbL</i>      | ribulose-bisphosphate carboxylase large chain             | K01601  | Thiofri_00013, Thiofri_03064, Thiofri_04982 | Thiowin_00012, Thiowin_01572, Thiowin_01759, Thiowin_04628 | Thiosp_00041, Thiosp_00266, Thiosp_03020     |
| <i>rbcS, cbbS</i>      | ribulose-bisphosphate carboxylase small chain             | K01602  | Thiofri_03063                               | Thiowin_01760                                              | Thiosp_03019                                 |
| <i>xfp, xpk</i>        | xylulose-5-phosphate/fructose-6-phosphate phosphoketolase | K01621  | Thiofri_01636, Thiofri_02580                | Thiowin_01664, Thiowin_03240                               | Thiosp_01912                                 |
| <i>fbaA</i>            | fructose-bisphosphate aldolase, class II                  | K01624  | Thiofri_04202                               | Thiowin_04044                                              | Thiosp_00934                                 |
| <i>rpe</i>             | ribulose-phosphate 3-epimerase                            | K01783  | Thiofri_03927                               | Thiowin_03832                                              | Thiosp_03736                                 |
| <i>tpiA</i>            | triosephosphate isomerase (TIM)                           | K01803  | Thiofri_03015                               | Thiowin_01864                                              | Thiosp_03325                                 |
| <i>rpiA</i>            | ribose 5-phosphate isomerase A                            | K01807  | Thiofri_04351                               | Thiowin_01330                                              | Thiosp_00410                                 |
| <i>fbp</i>             | fructose-1,6-bisphosphatase I                             | K03841  | Thiofri_03755                               | Thiowin_04261                                              | Thiosp_01574                                 |

**Table S10.** Genes of *Trv. frisiaus* DSM 111777<sup>T</sup>, *Trv. winogradskyi* DSM 6702<sup>T</sup>, *Trv. litoralis* 06511<sup>T</sup> involved in nitrogen metabolism annotated through KEGG online database and Geneious.

| Gene                            | Description                                             | KEGG code | <i>Trv.<br/>frisiaus</i><br>006511 <sup>T</sup> | <i>Trv.<br/>winogradskyi</i><br>DSM 6702 <sup>T</sup> | <i>Trv.<br/>litoralis</i><br>stain 970 <sup>T</sup> |
|---------------------------------|---------------------------------------------------------|-----------|-------------------------------------------------|-------------------------------------------------------|-----------------------------------------------------|
| <i>Hydrolase</i>                | ADP-ribosyl-[dinitrogen reductase] hydrolase            | -         | -                                               | -                                                     | Thiosp_02089                                        |
| <i>can</i>                      | carbonic anhydrase                                      | K01673    | Thiofri_02566,<br>Thiofri_02875                 | -                                                     | Thiosp_04803                                        |
| <i>cah</i>                      | carbonic anhydrase                                      | K01674    | -                                               | -                                                     | Thiosp_04665                                        |
| <i>cowN</i>                     | CO weal-nitrogenase                                     | -         | Thiofri_01782                                   | Thiowin_02413                                         | Thiosp_01780                                        |
| <i>Dinitrogenase cofactor 1</i> | Dinitrogenase iron-molybdenum cofactor                  | -         | Thiofri_04121                                   | Thiowin_04191                                         | Thiosp_01060                                        |
| <i>Dinitrogenase cofactor 2</i> | Dinitrogenase iron-molybdenum cofactor                  | -         | Thiofri_03621                                   | Thiowin_04210                                         | Thiosp_01592                                        |
| <i>draG 1</i>                   | ADP-ribosyl-[dinitrogen reductase] glycohydrolase       | -         | Thiofri_01467                                   | Thiowin_02508                                         | Thiosp_03922                                        |
| <i>draG 2</i>                   | ADP-ribosyl-[dinitrogen reductase] glycohydrolase       | -         | Thiofri_03311                                   | Thiowin_02585                                         | Thiosp_00980                                        |
| <i>draT</i>                     | NAD(+)-dinitrogen-reductase ADP-D-ribosyltransferase    | -         | Thiofri_01194                                   | Thiowin_00052                                         | -                                                   |
| <i>glnA</i>                     | glutamine synthetase                                    | K01915    | Thiofri_04606                                   | Thiowin_04786                                         | Thiosp_00295                                        |
| <i>glnB 1</i>                   | Nitrogen regulatory protein P-II                        | -         | Thiofri_01494                                   | Thiowin_01382                                         | Thiosp_00128                                        |
| <i>glnB 2</i>                   | Nitrogen regulatory protein P-II                        | -         | Thiofri_04774                                   | Thiowin_04999                                         | Thiosp_02763                                        |
| <i>glnG 1</i>                   | Nitrogen regulation protein NR(I)                       | -         | Thiofri_04602                                   | Thiowin_00022                                         | Thiosp_00292                                        |
| <i>glnG 2</i>                   | Nitrogen regulation protein NR(I)                       | -         | -                                               | Thiowin_04783                                         | Thiosp_04410                                        |
| <i>glnL</i>                     | Nitrogen regulation protein NR(II)                      | -         | Thiofri_04603                                   | Thiowin_04784                                         | Thiosp_00293                                        |
| <i>gltB</i>                     | glutamate synthase (NADPH) large chain                  | K00265    | Thiofri_04701                                   | Thiowin_04758                                         | Thiosp_04700                                        |
| <i>gltD</i>                     | glutamate synthase (NADPH) small chain                  | K00266    | Thiofri_04700                                   | Thiowin_04759                                         | Thiosp_04701                                        |
| <i>hcp</i>                      | hydroxylamine reductase                                 | K05601    | Thiofri_03474                                   | Thiowin_04302                                         | Thiosp_01683,<br>Thiosp_02885,<br>Thiosp_03355      |
| <i>narI</i>                     | nitrate reductase gamma subunit                         | K00374    | Thiofri_03973                                   | Thiowin_00384                                         | Thiosp_04052                                        |
| <i>NtcA</i>                     | global nitrogen regulator                               | -         | -                                               | Thiowin_03210                                         | -                                                   |
| <i>nifD 1</i>                   | Nitrogenase molybdenum-iron protein alpha chain         | K02586    | Thiofri_01039                                   | Thiowin_00876                                         | Thiosp_00781                                        |
| <i>nifD 2</i>                   | Nitrogenase molybdenum-iron protein alpha chain         | K02586    | Thiofri_01329                                   | Thiowin_04854                                         | Thiosp_03837                                        |
| <i>nifH1 2</i>                  | Nitrogenase iron protein 1                              | K02588    | Thiofri_01038                                   | Thiowin_04855                                         | Thiosp_00780                                        |
| <i>nifK 1</i>                   | Nitrogenase molybdenum-iron protein beta chain          | K02591    | Thiofri_01040                                   | Thiowin_00875                                         | Thiosp_00782                                        |
| <i>nifK 2</i>                   | Nitrogenase molybdenum-iron protein beta chain          | K02591    | -                                               | Thiowin_04853                                         | Thiosp_03836                                        |
| <i>nifL 1</i>                   | Nitrogen fixation regulatory protein                    | -         | Thiofri_00864                                   | Thiowin_00699                                         | Thiosp_03825                                        |
| <i>nifL 2</i>                   | Nitrogen fixation regulatory protein                    | -         | Thiofri_01299                                   | Thiowin_00954                                         | Thiosp_04256                                        |
| <i>nifL 3</i>                   | Nitrogen fixation regulatory protein                    | -         | Thiofri_01450                                   | Thiowin_02314                                         | Thiosp_04626                                        |
| <i>nifL 4</i>                   | Nitrogen fixation regulatory protein                    | -         | Thiofri_04381                                   | Thiowin_02958                                         | -                                                   |
| <i>nifW</i>                     | Nitrogenase-stabilizing/protective protein              | -         | Thiofri_02033                                   | Thiowin_03920                                         | Thiosp_03511                                        |
| <i>nifX 1</i>                   | nitrogen fixation protein                               | -         | Thiofri_01043                                   | Thiowin_04850                                         | Thiosp_00785                                        |
| <i>nifX 2</i>                   | nitrogen fixation protein                               | -         | Thiofri_01330                                   | Thiowin_00874                                         | Thiosp_03835                                        |
| <i>P-II</i>                     | Nitrogen regulatory protein P-II                        | -         | -                                               | -                                                     | Thiosp_02267                                        |
| <i>nitrogenase</i>              | nitrogenase-associated protein                          | -         | Thiofri_01530                                   | -                                                     | Thiosp_01215                                        |
| <i>nreC 1</i>                   | Nitrogen regulation protein C                           | -         | -                                               | Thiowin_01945                                         | Thiosp_02664                                        |
| <i>nreC 2</i>                   | Nitrogen regulation protein C                           | -         | -                                               | Thiowin_03114                                         | Thiosp_04744                                        |
| <i>ntrC</i>                     | Nitrogen assimilation regulatory protein                | -         | Thiofri_02851                                   | Thiowin_01825                                         | Thiosp_03613                                        |
| <i>ptsN</i>                     | Nitrogen regulatory protein                             | -         | Thiofri_04725                                   | Thiowin_00316                                         | Thiosp_04352                                        |
| <i>N2 fixation</i>              | putative nitrogen fixation protein                      | -         | Thiofri_01332                                   | Thiowin_00872                                         | Thiosp_03833                                        |
| <i>FixT</i>                     | putative nitrogen fixation protein                      | -         | Thiofri_01041                                   | Thiowin_04852                                         | Thiosp_00783                                        |
| <i>rnfB 1</i>                   | Nitrogen fixation protein                               | -         | Thiofri_00862                                   | Thiowin_00956                                         | Thiosp_03600                                        |
| <i>rnfB 2</i>                   | Nitrogen fixation protein                               | -         | Thiofri_02816                                   | Thiowin_03587                                         | Thiosp_04258                                        |
| <i>rnfC 1</i>                   | Nitrogen fixation protein                               | -         | Thiofri_00861                                   | Thiowin_00957                                         | Thiosp_03599                                        |
| <i>rnfC 2</i>                   | Nitrogen fixation protein                               | -         | Thiofri_02815                                   | Thiowin_03586                                         | Thiosp_04259                                        |
| <i>rnfD 1</i>                   | Nitrogen fixation protein                               | -         | Thiofri_00860                                   | Thiowin_00958                                         | Thiosp_03598                                        |
| <i>rnfD 2</i>                   | Nitrogen fixation protein                               | -         | Thiofri_02814                                   | Thiowin_03585                                         | Thiosp_04260                                        |
| <i>rnfE 1</i>                   | Nitrogen fixation protein                               | -         | Thiofri_00858                                   | Thiowin_00960                                         | Thiosp_03596                                        |
| <i>rnfE 2</i>                   | Nitrogen fixation protein                               | -         | Thiofri_02812                                   | Thiowin_03583                                         | Thiosp_04262                                        |
| <i>rnfG</i>                     | Nitrogen fixation protein                               | -         | Thiofri_00859                                   | Thiowin_00959                                         | Thiosp_03597                                        |
| <i>rnfG 2</i>                   | Nitrogen fixation protein                               | -         | Thiofri_02813                                   | Thiowin_03584                                         | Thiosp_04261                                        |
| <i>Signal-histidine kinase</i>  | Signal transduction histidine kinase, nitrogen specific | -         | Thiofri_04893                                   | -                                                     | -                                                   |
