# Supplementary material for: Thiorhodovibrio frisius and Trv. litoralis spp. nov., Two Novel Members from a Clade of Fastidious Purple Sulfur Bacteria That Exhibit Unique Red-Shifted Light-Harvesting Capabilities
Source: MDPI journal article supplement (doi:10.3390/microorganisms11102394), 2023-09-25
Supplement: s1 [file s1]

|                                 |   | 16S rRNA gene (%) |      |      |      |      | dDDH (d <sub>4</sub> , %) |      |      |      |      | ANI (%) |      |      |      |      |
|---------------------------------|---|-------------------|------|------|------|------|---------------------------|------|------|------|------|---------|------|------|------|------|
|                                 |   | 1                 | 2    | 3    | 4    | 5    | 1                         | 2    | 3    | 4    | 5    | 1       | 2    | 3    | 4    | 5    |
| <i>Trv. frisius</i>             | 1 | -                 | 98.0 | 97.5 | 96.2 | 92.5 | -                         | 26.5 | 34.2 | 23.5 | 27.0 | -       | 81.9 | 83.7 | 77.6 | 68.8 |
| <i>Trv. winogradskyi</i>        | 2 |                   | -    | 97.5 | 96.6 | 92.2 |                           | -    | 25.3 | 22.7 | 29.0 |         | -    | 79.1 | 77.7 | 68.9 |
| <i>Trv. litoralis</i>           | 3 |                   |      | -    | 95.5 | 92.6 |                           |      | -    | 24.0 | 27.8 |         |      | -    | 76.9 | 68.9 |
| <i>Rhabdochromatium marinum</i> | 4 |                   |      |      | -    | 93.0 |                           |      |      | -    | 21.7 |         |      |      | -    | 68.9 |
| <i>Thiospirillum jenense</i>    | 5 |                   |      |      |      | -    |                           |      |      |      | -    |         |      |      |      | -    |

**Table S2. Genetic speciation characteristics of *Thiorhodovibrio* sp. and associated photosynthetic relatives.** A Comparison of three genome-sequenced *Thiorhodovibrio* strains, *Rhabdochromatium marinum* DSM 5261<sup>T</sup>, and *Thiospirillum jenense* DSM 216<sup>T</sup> using 16S rRNA gene similarity, Digital DNA-DNA hybridization values (dDDH) and Average Nucleotide Identity (ANI) values between the five genomes.
