# Supplementary material for: Thiorhodovibrio frisius and Trv. litoralis spp. nov., Two Novel Members from a Clade of Fastidious Purple Sulfur Bacteria That Exhibit Unique Red-Shifted Light-Harvesting Capabilities
Source: MDPI journal article supplement (doi:10.3390/microorganisms11102394), 2023-09-25
Supplement: s1 [file s1]

A) 16S rRNA gene

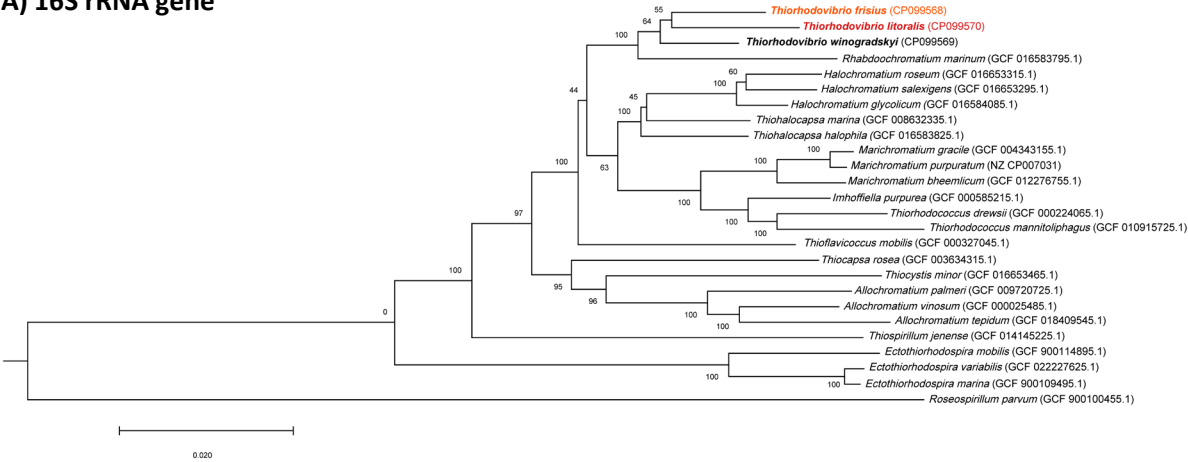

B) Genome

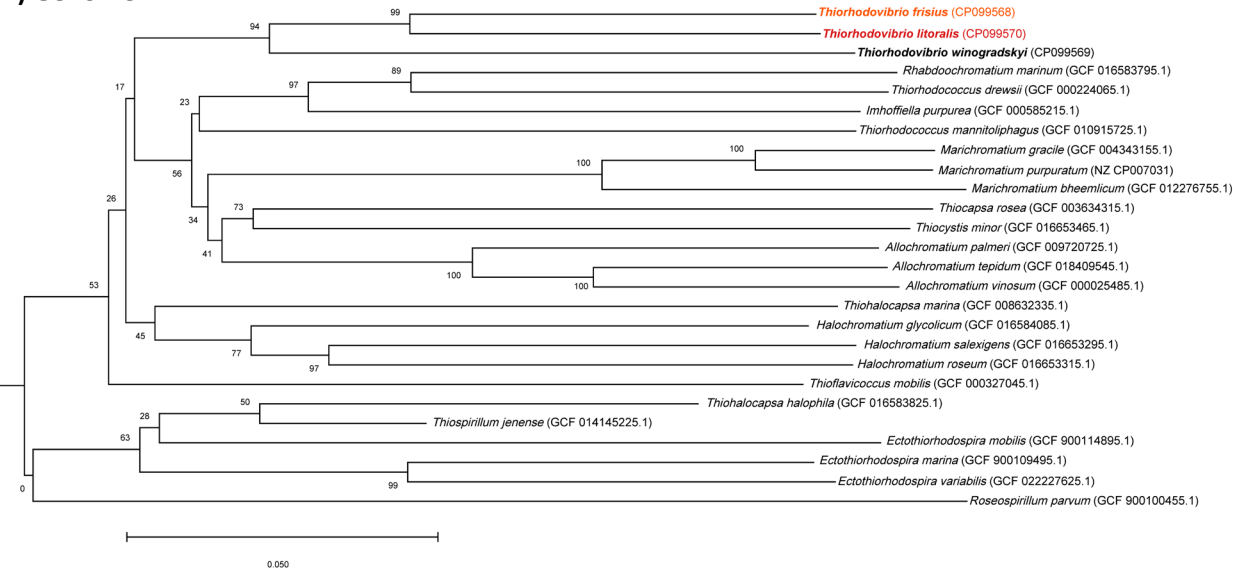

C) Proteome

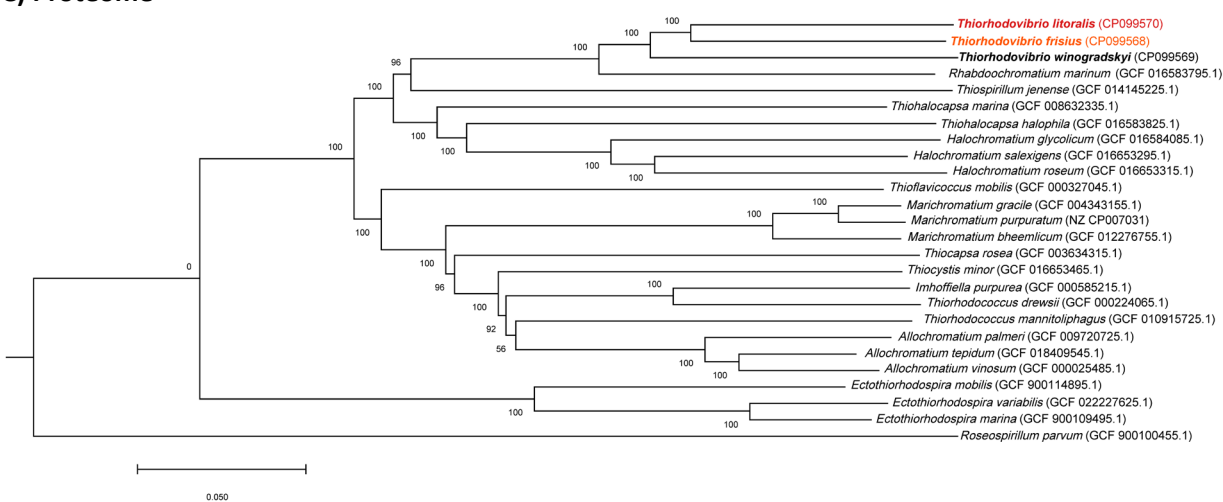

**Figure S3. TYGS based phylogenetic trees.** Trees rooted at midpoint were inferred with FastME 2.1.6.1 from GBDP distances calculated with formula  $d_s$  using **(A)** 16S rRNA gene, **(B)** genome, or **(C)** whole-proteome amino acid sequences. Pseudo-bootstrap support values >60% from 100 replications are depicted, with an average branch support of 87.8, 67.9, and 97.4% respectively.
