# Supplementary material for: Thiorhodovibrio frisius and Trv. litoralis spp. nov., Two Novel Members from a Clade of Fastidious Purple Sulfur Bacteria That Exhibit Unique Red-Shifted Light-Harvesting Capabilities
Source: MDPI journal article supplement (doi:10.3390/microorganisms11102394), 2023-09-25
Supplement: s1 [file s1]

**Table S3.** Genes of *Thiorhodovibrio* spp. involved in osmotic adaptation.

| "Glycine" related genes             | Description                                                 | Trv.<br><i>frisius</i><br>006511 <sup>T</sup> | Trv.<br><i>winogradskyi</i><br>DSM 6702 <sup>T</sup> | Trv.<br><i>litoralis</i><br>stain 970 <sup>T</sup> |
|-------------------------------------|-------------------------------------------------------------|-----------------------------------------------|------------------------------------------------------|----------------------------------------------------|
| <i>betL</i>                         | Glycine betaine-Na(+) symporter                             | -                                             | -                                                    | Thiosp_03236                                       |
| <i>gbuA</i>                         | Glycine betaine/carnitine transport ATP-binding             | -                                             | -                                                    | Thiosp_01381                                       |
| <i>gbuB</i>                         | Glycine betaine/carnitine transport permease                | -                                             | Thiowin_03044                                        | Thiosp_04329                                       |
| <i>gbuC 1</i>                       | Glycine betaine/carnitine transport binding precursor       | Thiofri_04750                                 | Thiowin_03045                                        | Thiosp_04328                                       |
| <i>gbuC 2</i>                       | Glycine betaine/carnitine transport binding precursor       | -                                             | Thiowin_03937                                        | -                                                  |
| <i>gcvH</i>                         | Glycine cleavage system H protein                           | Thiofri_02064                                 | Thiowin_03799                                        | Thiosp_02802                                       |
| <i>gcvPA</i>                        | putative glycine dehydrogenase [decarboxylating]subunit 1   | Thiofri_02063                                 | Thiowin_03800                                        | Thiosp_02803                                       |
| <i>gcvPB</i>                        | putative glycine dehydrogenase [decarboxylating]subunit 2   | Thiofri_02062                                 | Thiowin_03801                                        | Thiosp_02804                                       |
| <i>G/S N-methyltransferase</i>      | Glycine/sarcosine N-methyltransferase                       | Thiofri_00397                                 | Thiowin_05092                                        | Thiosp_00206                                       |
| <i>G/S/D N-methyltransferase</i>    | Glycine/sarcosine/dimethylglycine N-methyltransferase       | -                                             | Thiowin_02708                                        | -                                                  |
| <i>glyQ</i>                         | Glycine--tRNA ligase alpha subunit                          | Thiofri_04609                                 | Thiowin_04789                                        | Thiosp_00297                                       |
| <i>glyS</i>                         | Glycine--tRNA ligase beta subunit                           | Thiofri_04610                                 | Thiowin_04790                                        | Thiosp_00298                                       |
| <i>opuAB</i>                        | Glycine betaine transport system permease                   | Thiofri_04749                                 | -                                                    | -                                                  |
| <i>opuCA</i>                        | Glycine betaine/carnitine/choline transport ATP-binding     | -                                             | Thiowin_01936                                        | Thiosp_01005                                       |
| <i>opuCB</i>                        | Glycine betaine/carnitine/choline transport system permease | -                                             | Thiowin_01935                                        | Thiosp_01004                                       |
| <i>opuD 1</i>                       | Glycine betaine transporter                                 | Thiofri_02247                                 | Thiowin_01524                                        | Thiosp_03115                                       |
| <i>opuD 2</i>                       | Glycine betaine transporter                                 | -                                             | Thiowin_03936                                        | Thiosp_03560                                       |
| <i>proV</i>                         | Glycine betaine/L-proline transport ATP-binding             | Thiofri_04748                                 | Thiowin_03043                                        | Thiosp_04330                                       |
| <i>purD</i>                         | Phosphoribosylamine--glycine ligase                         | Thiofri_03608                                 | Thiowin_01621                                        | Thiosp_01166                                       |
| <i>N-methyltransferase</i>          | Sarcosine/dimethylglycine N-methyltransferase               | Thiofri_00398                                 | Thiowin_05093                                        | Thiosp_00205                                       |
| <i>thiO</i>                         | Glycine oxidase                                             | Thiofri_00930                                 | Thiowin_04410                                        | -                                                  |
| <b>"Sodium (Na+)" related genes</b> |                                                             |                                               |                                                      |                                                    |
| <i>Na+ SNF</i>                      | Na+-dependent transporters of the SNF family protein        | Thiofri_01513                                 | Thiowin_03606                                        | Thiosp_02360                                       |
| <i>NhaD 1</i>                       | Na+/H+ antiporter, NhaD family                              | Thiofri_01606                                 | Thiowin_02804                                        | Thiosp_02827                                       |
| <i>NhaD 2</i>                       | Na+/H+ antiporter, NhaD family                              | -                                             | -                                                    | Thiosp_02340                                       |
| <i>DASS 1</i>                       | transporter, divalent anion:Na+ symporter (DASS)family      | Thiofri_01961                                 | Thiowin_01270                                        | Thiosp_02339                                       |
| <i>DASS 2</i>                       | transporter, divalent anion:Na+ symporter (DASS)family      | Thiofri_02589                                 | Thiowin_01655                                        | Thiosp_01897                                       |
| <i>mrpF 1</i>                       | Sodium-cholate efflux protein MrpF                          | Thiofri_02888                                 | Thiowin_03711                                        | Thiosp_01848                                       |
| <i>mrpF 2</i>                       | Sodium-cholate efflux protein MrpF                          | -                                             | -                                                    | Thiosp_03149                                       |
| <i>nhaK</i>                         | Sodium, potassium, lithium and rubidium/H(+) antiporter     | Thiofri_04950                                 | Thiowin_01384                                        | -                                                  |
| <i>ntpD</i>                         | V-type sodium pump subunit D                                | -                                             | -                                                    | Thiosp_00061                                       |
| <i>SSS small</i>                    | putative solute:sodium symporter small subunit              | Thiofri_02774                                 | Thiowin_00883                                        | Thiosp_02403                                       |
| <i>sodium/calcium exchanger 1</i>   | sodium/calcium exchanger 1                                  | -                                             | Thiowin_03917                                        | -                                                  |
| <i>SSS</i>                          | transporter, solute:sodium symporter (SSS) family           | -                                             | Thiowin_03497                                        | -                                                  |

**Table S4.** Genes of *Trv. frisius* DSM111777<sup>T</sup>, *Trv. winogradskyi* DSM 6702<sup>T</sup>, *Trv. litoralis* 06511<sup>T</sup> potentially involved in the detoxification of oxygen and oxygen radicals.

| "Oxidase/ Peroxidase" related genes              | Description                                         | <i>Trv.<br/>frisius<br/>006511<sup>T</sup></i> | <i>Trv.<br/>winogradskyi<br/>DSM 6702<sup>T</sup></i> | <i>Trv.<br/>litoralis<br/>stain 970<sup>T</sup></i> |
|--------------------------------------------------|-----------------------------------------------------|------------------------------------------------|-------------------------------------------------------|-----------------------------------------------------|
| <i>bsaA</i>                                      | Glutathione peroxidase                              | Thiofri_01328                                  | Thiowin_03142                                         | Thiosp_01211                                        |
| <i>cbb3 subunit II</i>                           | cbb3-type cytochrome c oxidase subunit II           | Thiofri_01951                                  | Thiowin_01259                                         | Thiosp_02327                                        |
| <i>ccpA</i>                                      | Cytochrome c551 peroxidase precursor                | Thiofri_04511                                  | -                                                     | Thiosp_04559                                        |
| <i>coproporphyrinogen III oxidase</i>            | coproporphyrinogen III oxidase                      | Thiofri_04847                                  | Thiowin_00940                                         | Thiosp_03571                                        |
| <i>coproporphyrinogen III oxidase</i>            | coproporphyrinogen III oxidase                      | Thiofri_02232                                  | -                                                     | -                                                   |
| <i>coproporphyrinogen III oxidase</i>            | coproporphyrinogen III oxidase                      | Thiofri_04860                                  | -                                                     | -                                                   |
| <i>cpo</i>                                       | Non-heme chloroperoxidase                           | Thiofri_03789                                  | Thiowin_01227                                         | Thiosp_01564                                        |
| <i>cydA</i>                                      | Cytochrome d ubiquinol oxidase subunit 1            | Thiofri_01486                                  | Thiowin_01374                                         | Thiosp_02771                                        |
| <i>cydB</i>                                      | Cytochrome d ubiquinol oxidase subunit 2            | Thiofri_01485                                  | Thiowin_01373                                         | Thiosp_02772                                        |
| <i>CcoG</i>                                      | cytochrome c oxidase accessory protein CcoG         | Thiofri_01954                                  | Thiowin_01262                                         | Thiosp_02330                                        |
| <i>cytC oxidase, cbb3-type, subunit III</i>      | cytochrome c oxidase, cbb3-type, subunit III        | Thiofri_01906                                  | Thiowin_04603                                         | Thiosp_02334                                        |
| <i>Cyt oxidase complex assembly protein 1</i>    | Cytochrome oxidase complex assembly protein 1       | Thiofri_02898                                  | -                                                     | -                                                   |
| <i>Cyt oxidase maturation protein, cbb3-type</i> | cytochrome oxidase maturation protein, cbb3-type    | Thiofri_01957                                  | Thiowin_01265                                         | -                                                   |
| <i>fixN</i>                                      | Cytochrome c oxidase subunit 1                      | Thiofri_01950                                  | Thiowin_01258                                         | Thiosp_02326                                        |
| <i>fixP</i>                                      | Cytochrome c oxidase subunit III                    | Thiofri_01953                                  | Thiowin_01261                                         | Thiosp_02329                                        |
| <i>garA</i>                                      | Glutathione amide-dependent peroxidase              | Thiofri_01026                                  | Thiowin_04194                                         | Thiosp_01050                                        |
| <i>hemF</i>                                      | Coproporphyrinogen-III oxidase, aerobic             | Thiofri_02877                                  | Thiowin_03700                                         | Thiosp_01856                                        |
| <i>hemN 1</i>                                    | Oxygen-independent coproporphyrinogen-III oxidase 1 | Thiofri_02216                                  | Thiowin_00485                                         | Thiosp_00537                                        |
| <i>hemN 2</i>                                    | Oxygen-independent coproporphyrinogen-III oxidase   | Thiofri_04147                                  | Thiowin_00568                                         | Thiosp_00723                                        |
| <i>hemN 3</i>                                    | Oxygen-independent coproporphyrinogen-III oxidase   | Thiofri_04572                                  | Thiowin_00766                                         | Thiosp_01551                                        |
| <i>hemY</i>                                      | Protoporphyrinogen oxidase                          | Thiofri_01523                                  | -                                                     | Thiosp_02467                                        |
| <i>katG 1</i>                                    | Catalase-peroxidase                                 | -                                              | Thiowin_01079                                         | Thiosp_03123                                        |
| <i>katG 2</i>                                    | Catalase-peroxidase                                 | -                                              | -                                                     | Thiosp_03157                                        |
| <i>katG 3</i>                                    | Catalase-peroxidase                                 | -                                              | -                                                     | Thiosp_03162                                        |
| <i>livQ 1</i>                                    | 6"-hydroxyparomomycin C oxidase                     | Thiofri_03586                                  | Thiowin_02493                                         | -                                                   |
| <i>livQ 2</i>                                    | 6"-hydroxyparomomycin C oxidase                     | -                                              | Thiowin_04316                                         | -                                                   |
| <i>nadB</i>                                      | L-aspartate oxidase                                 | Thiofri_02565                                  | Thiowin_02216                                         | Thiosp_02585                                        |
| <i>neoG</i>                                      | Paromamine 6'-oxidase                               | Thiofri_02821                                  | -                                                     | -                                                   |
| <i>nox</i>                                       | NADH oxidase                                        | Thiofri_04519                                  | Thiowin_04469                                         | Thiosp_04602                                        |
| <i>pdxH</i>                                      | Pyridoxine/pyridoxamine 5'-phosphate oxidase        | Thiofri_01096                                  | Thiowin_04023                                         | Thiosp_03618                                        |
| <i>protoporphyrinogen oxidase 1</i>              | protoporphyrinogen oxidase                          | Thiofri_02110                                  | Thiowin_04300                                         | Thiosp_01920                                        |
| <i>protoporphyrinogen oxidase 2</i>              | protoporphyrinogen oxidase                          | -                                              | Thiowin_03758                                         | -                                                   |
| <i>protoporphyrinogen oxidase 3</i>              | protoporphyrinogen oxidase                          | -                                              | Thiowin_03595                                         | -                                                   |
| <i>sodB 1</i>                                    | Superoxide dismutase [Fe]                           | Thiofri_01934                                  | Thiowin_02877                                         | Thiosp_02682                                        |
| <i>sodB 2</i>                                    | Superoxide dismutase [Fe]                           | -                                              | Thiowin_03340                                         | Thiosp_03213                                        |
| <i>sodC 1</i>                                    | Superoxide dismutase [Cu-Zn] precursor              | -                                              | Thiowin_03453                                         | Thiosp_03187                                        |
| <i>sodC 2</i>                                    | Superoxide dismutase [Cu-Zn] precursor              | -                                              | Thiowin_03557                                         | -                                                   |
| <i>thiO</i>                                      | Glycine oxidase                                     | Thiofri_00930                                  | Thiowin_04410                                         | -                                                   |
| <i>wbpB 1</i>                                    | UDP-N-acetyl-2-amino-2-deoxy-D-glucuronate oxidase  | -                                              | -                                                     | Thiosp_00142                                        |
| <i>wbpB 2</i>                                    | UDP-N-acetyl-2-amino-2-deoxy-D-glucuronate oxidase  | -                                              | -                                                     | Thiosp_04203                                        |

**Table S5.** Motility related genes annotated through KEGG online database for *Trv. frisius* DSM111777<sup>T</sup>, *Trv. winogradskyi* DSM 6702<sup>T</sup>, *Trv. litoralis* 06511<sup>T</sup>.

| Gene                    | Description                                                                | KO code | <i>Trv. frisius</i> 006511 <sup>T</sup> | <i>Trv. winogradskyi</i> DSM 6702 <sup>T</sup> | <i>Trv. litoralis</i> stain 970 <sup>T</sup>                    |
|-------------------------|----------------------------------------------------------------------------|---------|-----------------------------------------|------------------------------------------------|-----------------------------------------------------------------|
| <i>flgA</i>             | flagellar basal body P-ring formation protein FlgA                         | K02386  | Thiofri_04680                           | Thiowin_04913                                  | Thiosp_00317                                                    |
| <i>flgB</i>             | flagellar basal-body rod protein FlgB, proximal rod                        | K02387  | Thiofri_04683                           | Thiowin_04910                                  | Thiosp_00314                                                    |
| <i>flgC</i>             | flagellar basal-body rod protein FlgC, proximal rod                        | K02388  | Thiofri_04684                           | Thiowin_04909                                  | Thiosp_00313                                                    |
| <i>flgD</i>             | flagellar basal-body rod modification protein FlgD                         | K02389  | Thiofri_04685                           | Thiowin_04908                                  | Thiosp_00312                                                    |
| <i>flgE</i>             | flagellar hook protein FlgE                                                | K02390  | Thiofri_04686                           | Thiowin_04907                                  | Thiosp_00311                                                    |
| <i>flgF</i>             | flagellar basal-body rod protein FlgF, proximal rod                        | K02391  | Thiofri_04687                           | Thiowin_04906                                  | Thiosp_00310                                                    |
| <i>flgG</i>             | flagellar basal-body rod protein FlgG, distal rod                          | K02392  | Thiofri_04688                           | Thiowin_04905                                  | Thiosp_00309                                                    |
| <i>flgH</i>             | flagellar L-ring protein FlgH                                              | K02393  | Thiofri_04689                           | Thiowin_04904                                  | Thiosp_00308                                                    |
| <i>flgI</i>             | flagellar P-ring protein FlgI                                              | K02394  | Thiofri_04690                           | Thiowin_04903                                  | Thiosp_00307                                                    |
| <i>flgJ</i>             | peptidoglycan hydrolase FlgJ                                               | K02395  | Thiofri_04691                           | Thiowin_04902                                  | Thiosp_00306                                                    |
| <i>flgK</i>             | flagellar hook-associated protein 1, hook-filament junction                | K02396  | Thiofri_04692                           | Thiowin_04901                                  | Thiosp_00305                                                    |
| <i>flgL</i>             | flagellar hook-associated protein 3 FlgL, hook-filament junction           | K02397  | Thiofri_04693                           | Thiowin_04900                                  | Thiosp_00304                                                    |
| <i>flgM</i>             | negative regulator of flagellin synthesis FlgM                             | K02398  | <b>(Thiofri_04678)</b>                  | Thiowin_04914                                  | Thiosp_00318                                                    |
| -                       | - unknown gene insertion -                                                 | -       | <b>Thiofri_04679</b>                    | -                                              | -                                                               |
| <i>flgN</i>             | flagellar biosynthesis protein FlgN                                        | K02399  | Thiofri_04677                           | Thiowin_04915                                  | Thiosp_00319                                                    |
| <i>flhA</i>             | flagellar biosynthesis protein FlhA                                        | K02400  | Thiofri_04665                           | Thiowin_04927                                  | Thiosp_00333                                                    |
| <i>flhB</i>             | flagellar biosynthesis protein FlhB                                        | K02401  | Thiofri_04664                           | Thiowin_04928                                  | Thiosp_00334                                                    |
| <i>fliA, whiG</i>       | RNA polymerase sigma factor FliA                                           | K02405  | Thiofri_04668                           | Thiowin_04924                                  | Thiosp_00330                                                    |
| <i>fliC, hag</i>        | Flagellin, filament                                                        | K02406  | Thiofri_01373,<br>Thiofri_01400         | Thiowin_03649                                  | Thiosp_00043,<br>Thiosp_01323,<br>Thiosp_01326,<br>Thiosp_01354 |
| <i>fliD</i>             | flagellar hook-associated protein 2, cap                                   | K02407  | Thiofri_01375                           | Thiowin_03647                                  | Thiosp_01328                                                    |
| <i>fliE</i>             | flagellar hook-basal body complex protein FliE, proximal rod               | K02408  | Thiofri_04467                           | Thiowin_04887                                  | Thiosp_04408                                                    |
| <i>fliF</i>             | flagellar M-ring protein FliF                                              | K02409  | Thiofri_04466                           | Thiowin_04886                                  | Thiosp_04407                                                    |
| <i>fliG</i>             | flagellar motor switch protein FliG, C-ring                                | K02410  | Thiofri_04465                           | Thiowin_04885                                  | Thiosp_04406                                                    |
| <i>fliH</i>             | flagellar assembly protein FliH                                            | K02411  | Thiofri_04464                           | Thiowin_04884                                  | Thiosp_04405                                                    |
| <i>fliI</i>             | flagellum-specific ATP synthase                                            | K02412  | Thiofri_04463                           | Thiowin_04883                                  | Thiosp_04404                                                    |
| <i>fliJ</i>             | flagellar protein FliJ                                                     | K02413  | Thiofri_04462                           | Thiowin_04882                                  | Thiosp_04403                                                    |
| <i>fliK</i>             | flagellar hook-length control protein FliK                                 | K02414  | Thiofri_04461                           | Thiowin_04881                                  | Thiosp_04402                                                    |
| <i>fliL</i>             | flagellar protein FliL                                                     | K02415  | Thiofri_02262                           | -                                              | Thiosp_03578                                                    |
| <i>fliM</i>             | flagellar motor switch protein FliM, C-ring                                | K02416  | Thiofri_04658                           | Thiowin_04934                                  | Thiosp_00340                                                    |
| <i>fliN</i>             | flagellar motor switch protein FliN, C-ring                                | K02417  | Thiofri_04659                           | Thiowin_04933                                  | Thiosp_00339                                                    |
| <i>fliO, fliZ</i>       | flagellar protein FliO/FliZ                                                | K02418  | <b>(Thiofri_04660)</b>                  | Thiowin_04932                                  | Thiosp_00338                                                    |
| <i>fliP</i>             | flagellar biosynthesis protein FliP                                        | K02419  | Thiofri_04661                           | Thiowin_04931                                  | Thiosp_00337                                                    |
| <i>fliQ</i>             | flagellar biosynthesis protein FliQ                                        | K02420  | Thiofri_04662                           | Thiowin_04930                                  | Thiosp_00336                                                    |
| <i>fliR</i>             | flagellar biosynthesis protein FliR                                        | K02421  | Thiofri_04663                           | Thiowin_04929                                  | Thiosp_00335                                                    |
| <i>fliS</i>             | flagellar secretion chaperone FliS                                         | K02422  | Thiofri_01376                           | Thiowin_03644                                  | Thiosp_01329                                                    |
| <i>motA</i>             | chemotaxis protein MotA, stator                                            | K02556  | Thiofri_04378                           | Thiowin_00702                                  | Thiosp_00325,<br>Thiosp_04621                                   |
| <i>motB</i>             | chemotaxis protein MotB, stator                                            | K02557  | Thiofri_04377                           | Thiowin_00703                                  | Thiosp_00324,<br>Thiosp_04620                                   |
| <i>rpoD</i>             | RNA polymerase primary sigma factor                                        | K03086  | Thiofri_02358                           | Thiowin_02014                                  | Thiosp_02643                                                    |
| <i>rpoN</i>             | RNA polymerase sigma-54 factor                                             | K03092  | Thiofri_04727                           | Thiowin_00314                                  | Thiosp_04350                                                    |
| <i>fliA, fleQ, flaK</i> | sigma-54 dependent transcriptional regulator, flagellar regulatory protein | K10941  | Thiofri_00976,<br>Thiofri_04469         | Thiowin_04859,<br>Thiowin_04888                | Thiosp_00860,<br>Thiosp_04410                                   |
