# Supplementary material for: Thiorhodovibrio frisius and Trv. litoralis spp. nov., Two Novel Members from a Clade of Fastidious Purple Sulfur Bacteria That Exhibit Unique Red-Shifted Light-Harvesting Capabilities
Source: MDPI journal article supplement (doi:10.3390/microorganisms11102394), 2023-09-25
Supplement: s1 [file s1]

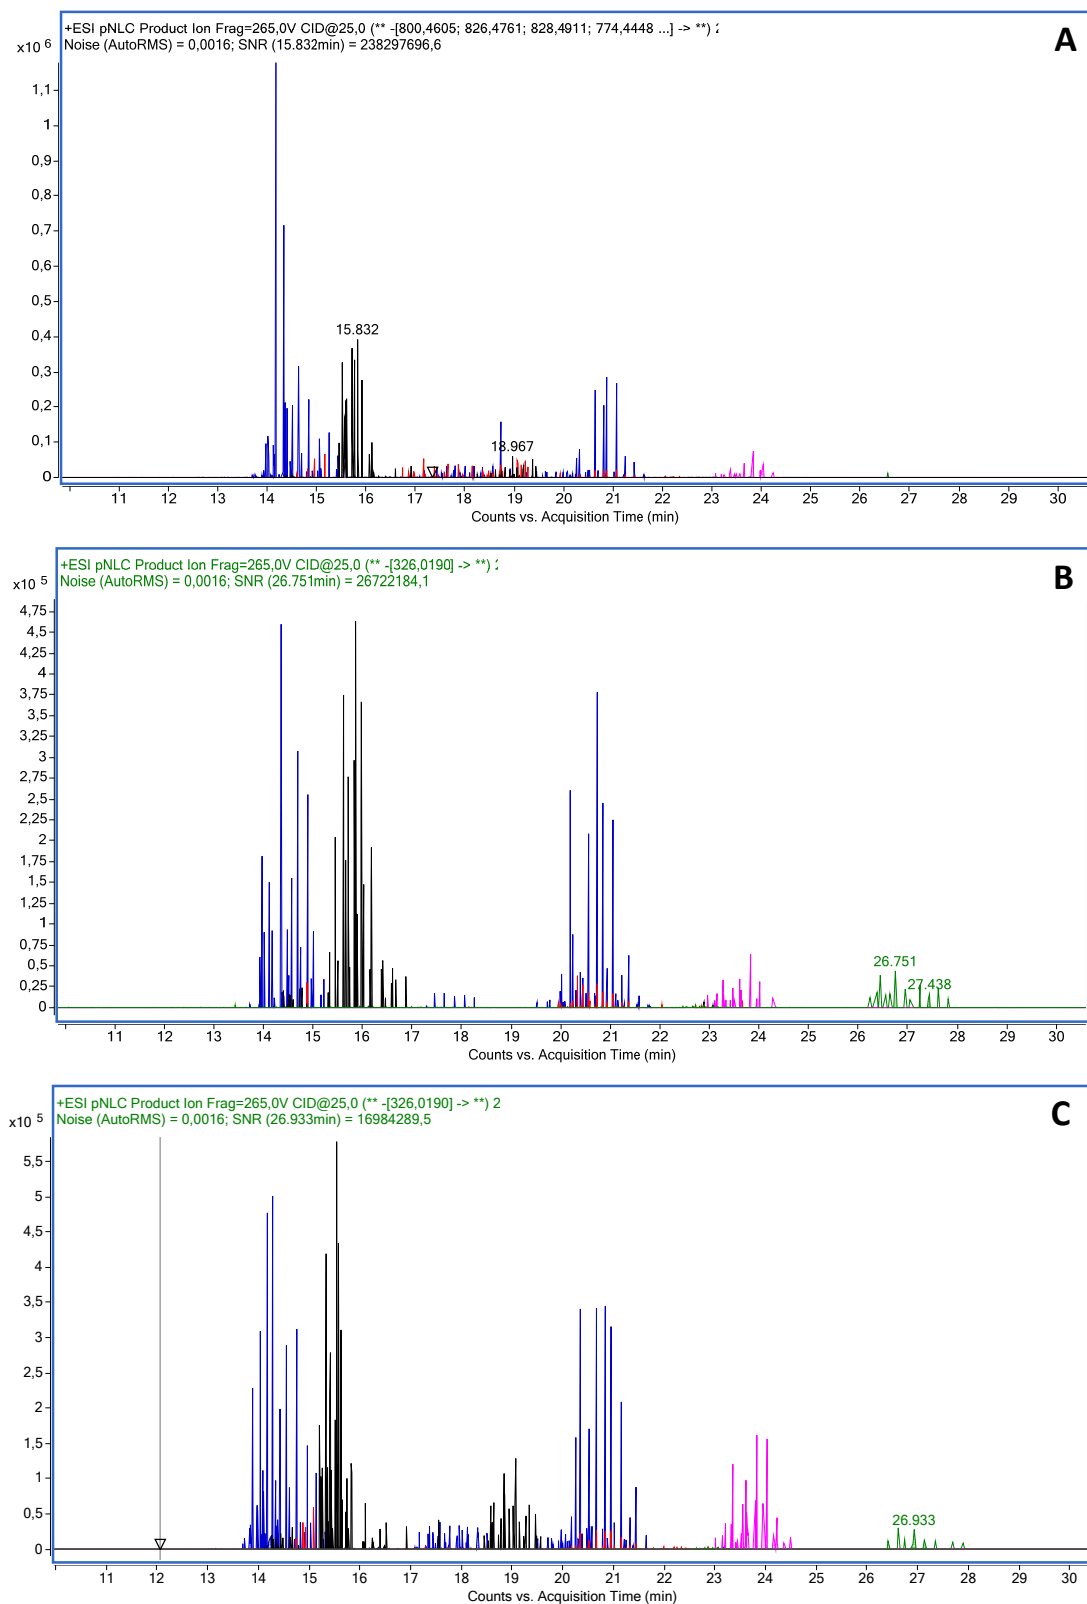

**Figure S2.** Neutral loss spectra of intact polar lipids found in **(A)** *Trv. frisius* DSM 111777<sup>T</sup>, **(B)** *Trv. winogradskyi* DSM 6702<sup>T</sup> and **(C)** *Trv. litoralis* strain 06511<sup>T</sup>. Blue: Neutral loss of m/z 141.0191 corresponding to phosphatidylethanolamine (~ 14 min) and lyso-phosphatidylethanolamine (~ 21 min); Red: Neutral loss of m/z 172.0137 corresponding to phosphatidylglycerol (~ 15 min) and lysophosphatidylglycerol (~ 20 min); Black: Neutral loss of one corelipid and phosphate, corresponding to diphosphatidylglycerol (~ 16 min). Pink: Neutral loss of m/z 270.06 (~ 23 min) corresponding to unknown glycolipids. Green: Neutral loss of m/z 326.02 corresponding to unknown glycolipids (~26 min).
