# Supplementary material for: Thiorhodovibrio frisius and Trv. litoralis spp. nov., Two Novel Members from a Clade of Fastidious Purple Sulfur Bacteria That Exhibit Unique Red-Shifted Light-Harvesting Capabilities
Source: Microorganisms. 2023 Sep 25;11(10):2394. doi: 10.3390/microorganisms11102394 (PMC10609205; doi:10.3390/microorganisms11102394)
Supplement: Supplementary file 1 [file microorganisms-11-02394-s001.zip]

Archive with 8 entries (8 files):
- Figure S1_2023.09.05.pptx
- Figure S2_2023.09.05.pdf
- Figure S3_2023.09.20.pdf
- Table S1_2023.09.05.xlsx
- Table S2_2023.09.05.pdf
- Table S6_2023.09.05.xlsx
- Tables S3-S5_2023.09.05.pdf
- Tables S7-S10_2023.09.05.pdf
