# Supplementary material for: Thiorhodovibrio frisius and Trv. litoralis spp. nov., Two Novel Members from a Clade of Fastidious Purple Sulfur Bacteria That Exhibit Unique Red-Shifted Light-Harvesting Capabilities
Source: Microorganisms. 2023 Sep 25;11(10):2394. doi: 10.3390/microorganisms11102394 (PMC10609205; doi:10.3390/microorganisms11102394)
Supplement: Supplementary file 1 [file microorganisms-11-02394-s001.zip › Table S1_2023.09.05.xlsx]

## Sheet: Table S1
Table S1: List of 43 photosynthetic taxa including 25 Chromatiaceae used for the phylogenomic analysis.
The order of taxa is corresponding to the phylogenomic UBCG tree in Figure S1. PS, photosynthesis genes. X, not available. *, not validly published.
	Taxonomy									Genome					References - Genome Paper
No	Species	Strain	Clade	Collection ID	Type Strain	Family	Order	Class	PS	Size (bp)	Contigs	Status	Accession	BacDive	Publication	Journal	DOI
01	Thiorodovibrio frisius	970	A	DSM 111777	yes	Chromatiaceae	Chromatiales	Gammaproteobacteria	yes	5,417,120	1	complete	CP099568	x	current study	current study	current study
02	Thiorhodovibrio winogradskyi	SSP1	A	DSM 6702	yes	Chromatiaceae	Chromatiales	Gammaproteobacteria	yes	5,478,625	1	complete	CP099569	https://bacdive.dsmz.de/strain/2475	current study	current study	current study
03	Thiorhodovibrio litoralis	06511	A	x	no	Chromatiaceae	Chromatiales	Gammaproteobacteria	yes	5,466,623	1	complete	CP099570	x	current study	current study	current study
04	Rhabdochromatium marinum	8315-5	A	DSM 5261	yes	Chromatiaceae	Chromatiales	Gammaproteobacteria	yes	4,363,877	214	draft	GCA_016583795.1	https://bacdive.dsmz.de/strain/2453	x	x	x
05	Thiospirillum jenense	1112	A	DSM 216	yes	Chromatiaceae	Chromatiales	Gammaproteobacteria	yes	3,217,111	123	draft	GCA_014145225.1	x	Imhoff et al. (2021)	Arch Microbiol	DOI: 10.1007/s00203-020-02006-7
06	Halochromatium roseum	JA134	A	DSM 18859	yes	Chromatiaceae	Chromatiales	Gammaproteobacteria	yes	5,173,123	88	draft	GCA_016653315.1	https://bacdive.dsmz.de/strain/2441	x	x	x
07	Lamprobacter modestohalophilus	INMI RO-1	A	DSM 25653	yes	Chromatiaceae	Chromatiales	Gammaproteobacteria	yes	5,693,679	209	draft	GCA_016583905.1	https://bacdive.dsmz.de/strain/132052	x	x	x
08	Halochromatium salexigens	6310	A	DSM 4395	yes	Chromatiaceae	Chromatiales	Gammaproteobacteria	yes	3,828,867	100	draft	GCA_016653295.1	https://bacdive.dsmz.de/strain/2439	x	x	x
09	MAG: Chromatiaceae bacterium	GEM2.Bin25	A	x	no	Chromatiaceae	Chromatiales	Gammaproteobacteria	yes	4,164,312	186	draft	GCA_007693535.1	x	x	x	x
10	Thiohalocapsa halophila	4270	A	DSM 6210	yes	Chromatiaceae	Chromatiales	Gammaproteobacteria	yes	5,738,447	303	draft	GCA_016583825.1	https://bacdive.dsmz.de/strain/168750	x	x	x
11	Thiohalocapsa sp.	ML-1	A	x	no	Chromatiaceae	Chromatiales	Gammaproteobacteria	yes	6,305,354	137	draft	GCA_001469165.1	x	Hamilton et al. (2014)	Geobiology	DOI: 10.1111/gbi.12092
12	Allochromatium vinosum	D	B	DSM 180	yes	Chromatiaceae	Chromatiales	Gammaproteobacteria	yes	3,669,074	3	complete	GCA_000025485.1	https://bacdive.dsmz.de/strain/2439	x	x	x
13	Thermochromatium tepidum	MC	B	ATCC 43061	yes	Chromatiaceae	Chromatiales	Gammaproteobacteria	yes	2,958,290	1	complete	GCA_009664085.1	https://bacdive.dsmz.de/strain/23848	x	x	x
14	Thiorhodococcus drewsii	AZ1	B	DSM 15006	yes	Chromatiaceae	Chromatiales	Gammaproteobacteria	yes	5,524,189	141	draft	GCA_000224065.2	https://bacdive.dsmz.de/strain/2471	x	x	x
15	Imhoffiella purpurea	AK35	B	JCM 18851	yes	Chromatiaceae	Chromatiales	Gammaproteobacteria	yes	4,766,665	151	draft	GCA_000585215.1	https://bacdive.dsmz.de/strain/162311	x	x	x
16	Thiorhodococcus minor	CE 2203	B	DSM 11518	yes	Chromatiaceae	Chromatiales	Gammaproteobacteria	yes	6,204,626	389	draft	GCA_010820565.1	https://bacdive.dsmz.de/strain/2470	x	x	x
17	Thiobaca trueperi	BCH	B	DSM 13587	yes	Chromatiaceae	Chromatiales	Gammaproteobacteria	yes	4,073,386	21	draft	GCA_004342175.1	https://bacdive.dsmz.de/strain/2463	x	x	x
18	Thiocystis minor	1211	B	DSM 178	yes	Chromatiaceae	Chromatiales	Gammaproteobacteria	yes	5,296,679	198	draft	PRJNA335146	https://bacdive.dsmz.de/strain/168934	x	x	x
19	Chromatium okenii	LaCa	B	x	no	Chromatiaceae	Chromatiales	Gammaproteobacteria	yes	3,784,749	45	draft	GCA_002958735.1	x	x	x	x
20	Thiocapsa rosea	6611	B	DSM 235	yes	Chromatiaceae	Chromatiales	Gammaproteobacteria	yes	6,111,855	2	complete	GCA_003634315.1	https://bacdive.dsmz.de/strain/2478	x	x	x
21	Marichromatium gracile	8611	B	DSM 203	yes	Chromatiaceae	Chromatiales	Gammaproteobacteria	yes	3,830,035	30	draft	GCA_004343155.1	https://bacdive.dsmz.de/strain/2445	x	x	x
22	Lamprocystis purpurea	ThScb 12	B	DSM 4197	yes	Chromatiaceae	Chromatiales	Gammaproteobacteria	yes	6,908,745	213	draft	GCA_000379525.1	https://bacdive.dsmz.de/strain/168286	x	x	x
23	Candidatus Thiodictyon syntrophicum	Cad16	B	JCM 15483	yes	Chromatiaceae	Chromatiales	Gammaproteobacteria	yes	7,738,984	3	complete	GCA_002813775.1	https://bacdive.dsmz.de/strain/161593	x	x	x
24	Thiococcus pfennigii	8320	B	x	no	Chromatiaceae	Chromatiales	Gammaproteobacteria	yes	4,076,754	180	draft	GCA_016583835.1	x	x	x	x
25	Thioflavicoccus mobilis	8321	B	ATCC 700959	no*	Chromatiaceae	Chromatiales	Gammaproteobacteria	yes	4,137,521	2	complete	GCA_000327045.1	x	x	x	x
26	Ectothiorhodospira haloalkaliphila	A	x	x	no	Ectothiorhodospiraceae	Chromatiales	Gammaproteobacteria	yes	3,460,134	137	draft	GCA_000583815.1	x	x	x	x
27	Ectothiorhodospira magna	B7-7	x	DSM 22250	yes	Ectothiorhodospiraceae	Chromatiales	Gammaproteobacteria	yes	2,721,342	59	draft	GCA_900110965.1	https://bacdive.dsmz.de/strain/4280	x	x	x
28	Ectothiorhodosinus mongolicus	M9	x	DSM 15479	yes	Ectothiorhodospiraceae	Chromatiales	Gammaproteobacteria	yes	1,990,961	6	draft	GCA_900156225.1	https://bacdive.dsmz.de/strain/4302	x	x	x
29	Thiorhodospira sibirica	A12	x	ATCC 700588	yes	Ectothiorhodospiraceae	Chromatiales	Gammaproteobacteria	yes	3,196,878	88	draft	GCA_000227725.3	https://bacdive.dsmz.de/strain/169132	x	x	x
30	Halorhodospira halophila	SL 1	x	DSM 244	yes	Ectothiorhodospiraceae	Chromatiales	Gammaproteobacteria	yes	2,678,452	1	complete	GCF_000015585.1	https://bacdive.dsmz.de/strain/4283	x	x	x
31	Halorhodospira halochloris	A	x	DSM 1059	yes	Ectothiorhodospiraceae	Chromatiales	Gammaproteobacteria	yes	2,834,560	1	complete	GCA_002356555.2	https://bacdive.dsmz.de/strain/4282	x	x	x
32	Congregibacter litoralis	KT71	x	DSM 17192	yes	Halieaceae	Cellvibrionales	Gammaproteobacteria	yes	4,351,117	6	complete	GCA_000153125.2	https://bacdive.dsmz.de/strain/17910	x	x	x
33	Gammaproteobacterium	NOR5-3	x	x	no	Halieaceae	Cellvibrionales	Gammaproteobacteria	yes	4,208,084	9	draft	GCA_000158155.1	x	x	x	x
34	Pseudohaliea rubra	CM41-15a	x	DSM 19751	yes	Halieaceae	Cellvibrionales	Gammaproteobacteria	yes	3,212,303	90	draft	GCA_000764025.1	https://bacdive.dsmz.de/strain/496	x	x	x
35	Chromatocurvus halotolerans	EG19	x	DSM 23344	yes	Halieaceae	Cellvibrionales	Gammaproteobacteria	yes	3,910,325	45	draft	GCA_004340525.1	https://bacdive.dsmz.de/strain/17923	x	x	x
36	Luminiphilus syltensis	NOR5-1B	x	DSM 22749	yes	Halieaceae	Cellvibrionales	Gammaproteobacteria	yes	3,261,541	29	draft	GCA_000158175.1	https://bacdive.dsmz.de/strain/23448	x	x	x
37	Nevskia ramosa	Soe1	x	DSM 11499	yes	Nevskiaceae	Nevskiales	Gammaproteobacteria	yes	4,515,285	13	draft	GCA_000420645.1	https://bacdive.dsmz.de/strain/17659	x	x	x
38	Methyloversatilis universalis	Fam500	x	x	no	Sterolibacteriaceae	Nitrosomonadales	Betaproteobacteria	yes	4,220,164	1	complete	GCA_000478565.1	x	x	x	x
39	Rhodocyclus gracilis	x	x	DSM 112	no	Rhodocyclaceae	Rhodocyclales	Betaproteobacteria	yes	2,980,846	27	draft	GCA_011881425.1	x	x	x	x
40	Rubrivivax gelatinosus	x	x	DSM 1709	yes	Comamonadaceae	Burkholderiales	Betaproteobacteria	yes	5,075,359	37	draft	GCA_004340905.1	https://bacdive.dsmz.de/strain/17933	x	x	x
41	Dinoroseobacter shibae	DFL12	x	DSM 16493	yes	Rhodobacteraceae	Rhodobacterales	Alphaproteobacteria	yes	4,417,868	6	complete	GCA_000018145.1	https://bacdive.dsmz.de/strain/13662	x	x	x
42	Roseobacter litoralis	OCh 149	x	DSM 6996	yes	Rhodobacteraceae	Rhodobacterales	Alphaproteobacteria	yes	4,745,450	4	complete	GCA_000154785.2	https://bacdive.dsmz.de/strain/13764	x	x	x
43	Rhodovulum sp.	PH10	x	x	no	Hyphomicrobiaceae	Hyphomicrobiales	Alphaproteobacteria	yes	4,831,432	273	draft	GCF_000293785.1	x	x	x	x
