# Supplementary material for: Thiorhodovibrio frisius and Trv. litoralis spp. nov., Two Novel Members from a Clade of Fastidious Purple Sulfur Bacteria That Exhibit Unique Red-Shifted Light-Harvesting Capabilities
Source: Microorganisms. 2023 Sep 25;11(10):2394. doi: 10.3390/microorganisms11102394 (PMC10609205; doi:10.3390/microorganisms11102394)
Supplement: Supplementary file 1 [file microorganisms-11-02394-s001.zip › Table S6_2023.09.05.xlsx]

## Sheet: Table S6A PGC-Tfrisius
Table S6A: Operons of the photosynthesis gene cluster of Thiorhodovibrio frisius strain 970 = DSM 111777 (T)
Order of genes in the PGC and localization on the plus and minus strand. The color code and numbering of proteins is corresponding to those of Dinoroseobacter shibae DSM 16493 (Brinkmann et al. 2018). Protein accession numbers are highlighted in blue, corresponding locus tags are shown in black.
Operons of the "Photosynthesis Gene Cluster" (PGC) - Thiorhodovibrio frisius strain 970 (Chromosome; 5,417,120 bp [Accession pending]).
No	Gene	Strand	Accession	Locus Tag	Range	Size (AA)	Protein	AA	Comment
x	TgpA_1	plus	pending	Thiofri_00869	814115..816160	681	Protein-glutamine gamma-glutamyltransferase	MKIKRNATRRLAPRSTGEPAPDFLQIGLLTALLGLAAVPLLFYM KAPVAGYIALVLLARVAVLFRPALTPGRWPLVALAFLGMGVVLAAYRELAGQDAGTAL LLTMMVLKTLEIRAMRDLRVSLLLFGFLLVVAFLFNQSPLFAVYLGALLLGSFALLAD LSAVRRDAGRQAWIKRLRAAGRRAVVLSGQAVPLAALLFVLFPRLDSPLWSLGLERDR AQTGVSDSLELGNFSELVRVGAVAFHAYFDQPLPVEPSELYWRGPVLWQTDGRGWEPG PKELMTDLPADIESLGEELDYAIVMEATEQRWIFALDLPLAAPADAQLTRDARLVARE PLQELKRFELRSALKYRSLALTSPERELALELPERMITPRMRLLVGAWQEQGGGARAI …	x
x	x	plus	pending	Thiofri_00870	816463..817962	488	HDOD domain protein	MTLNAWTNFLTDTELPAFARTVSDVTRISNDPEASAYKLSNAIA KDAAMAARLVKLANSPLFPSSHGNIQTVDRGVVLLGFDAVRDLAISLSVIEQVLRGQS RAALLEEMALAFHTATQAQTLARMAQDDVVAEIFVAGLLYRIGGLAALSSSDPRVNNY LAEKAEFGDDEAVQIARLEKRTFGCDMTQLSLRLAQHWSLGQVLQKALSSEPGQAGER IATGRRIAEVAMRRGWESNEIQQLLSRVARNMGLNLADMREKVHQSSDVAREMAVQFG ATKVAPLIPETARAKAKRDKAERKAAAEASAAEAGDETALGEDGYPAGLLRPNPMLQL EMLGRMAELLNGKPDINRLLTTVVEGVHRGIGMDRTVFALLTTKKDAIAAKYVLTEVE …	x
15	crtC	minus	pending	Thiofri_00871	RC_818052..819281	409	hydroxyneurosporene dehydrogenase	MRRAHLRPAQPLWATAASSAGFHPPGLTDPVRAAVPDQRWRHLW PRIPRLDGVFQSTGSTHQAAGPVSGGGRPPPGTGTAEGDPIRPSDSADRARGPAFDQS IPKNGYLWWYIDALSDDGQHGLTIIALLGSVFSPYYARARQRGPADPEHFCALNAVIY GASGKRWAMTERGRQRLSRTPTELRIGPSQLHWDGDDLVIDIHETAAPIPLPLRGQVR VRPQTMTRHVEQLDQHGRHHWWPIAPDSRVSVQLSHPHLHWSGDGYLDSNWGSEPLEQ GFTDWDWSRAKRRQGGAVVLYEANRRDGSALSLALQVNRDGSVEPFEPPARVPLPTTT VWRIARATRSEHPVTGETRAQVLETLEDTPFYARSTIATRLLGEPVTAVHESLSLDRF …	Removal of CrtD
18	crtEF	plus	pending	Thiofri_00872	819825..821879	684	geranylgeranyl pyrophosphate synthetase & hydroxyneurosporene methyltransferase	MDVMSRIEQTLKRAIAQGSGEAAPPLLEAATRHAVFPGGGRVRPRLCLAVALACGDDAPA	Fusion of CrtE & CrtF
19	bchC	plus	pending	Thiofri_00873	822096..823070	324	2-desacetyl-2-hydroxyethyl bacteriochlorophyllide A dehydrogenase	MPIDMNTLAVVLEQPEQLAVRRLDLTPPSPADCVVGIHWSGIST GTERLLWSGRMPPFPGLAYPLVPGYESVGQILAAGEDSGRVEGEQVFVPGARCYGEVA GLFGGAASRVVAPGNRLLPLPANMGEKGVLMALAATAHHAIAPEVATGQAHSGQTPDL IIGHGVLGRLLARLAVVMGGKPVVWERNPERVAGAEGYQVIDPASDERRDYRCICDVS GDSKLLDILIARMAPGGEIVLGGFYEAPLSFDFPPAFMRELRLRVAAEFKEPDLIAVK SLIESGRLSFDGLITHRLPADQAAEAYVTAFSDPSCLKMILDWRHVDV	x
20	bchX	plus	pending	Thiofri_00874	823063..824070	335	chlorophyllide a reductase iron protein subunit X	MFNPAGHFAPGQPFEQPSGLPEAGGAGSGGNGSGKRPEIIAIYG KGGIGKSFTLANLSYMFAQLGKKVLLIGCDPKSDTATLLFGGRSCPTIIETSSKKKLA GEPVEIGDVCFKRDGVFAMELGGPEVGRGCGGRGIIHGFELLESLGFNDWDFDYVLLD FLGDVVCGGFGLPIARDMCQKVMLVGSNDLQSLYVANNVCSAVEYFRGLGGNVGVAGM VINKDDGTGEAQRFAEKVGVPVLAEIPQDDDIRRKSAAYQIIGKLDSPWAGLFKGLAE QVAIAPPLQTTPLAHEDLLGLFASDAVGRDVVLEPAKPEDMCSVQKTVKPSLEVLYDD A	x
21	bchY	plus	pending	Thiofri_00875	824120..825634	504	chlorophyllide a reductase subunit Y	MIRLASDNHAPRAPELVPDQIAAASAGACHAGEDHIRRTAEVAG QSELLDRFAADYPAGPHDRPQTMCPAFGSLRIGLRMRRTASVLCGSACCVYGLSFTSH FYGAKRSVGYVPFDSETLVTGKLFEDLREAVEQLADHELYDAIVVMNLCVPTASGVPL RLLPQSINGVRVIGIDVPGFGVPTHAEAKDVLCGAMLKRARGEAETGPVQAPRGGRSQ KPTVTLLGDMFPADPVGIGMLLEPLGLAAGPVVPTREWRELYGALDCAAVAAIHPYYV ASIREFEQAGRPIVGSAPVGHDGTEAWLSAIGDACNIKADLVAAAKNAVLPAIKGALS QASIKGTITVSGYEGSELLVARLLVESGANVPYVGTATSRTRWADADLAWLEDKGVKV …	x
22	bchZ	plus	pending	Thiofri_00876	825634..827115	493	chlorophyllide a reductase subunit Z	MFVLDLDRAGGYWGAVYVFTAVKGLQVIIDGPVGCENLPVTAVL HYTDALPPHELPVVVTGLGEEELGQEGTENAMKRAFATLDPKQPAVVVTGSIAEMIGG GVTPAGTNIQRFLPRTIDEDQWQSADRAMVWLWTQFGAKGKHAAGKAKTKADSAKTCK PSVNIIGPAYGCFNTASDLAEVRRLVEGMGAEINMIFPLGAQLDELPRLADADVNICM YREYGRKLCEALEKPFLQAPIGLHSTVAFLRKLGELLGLDPEPFIEREKHTTIKPIWD LWRSVTQDFFGTASFGIAATETYSRGVRHYLEDELGMPCHFAIARRPGVKTDNAATRE AVRGKTPLVVFGGYNERMYLAEAGGRAAFIPASLPGTLVRRHTGTPFMGFSGATYLVQ …	x
24	pufB_1	plus	pending	Thiofri_05041	827366..827504	46	light-harvesting protein, PufB	MAEKSTTGLTEAESKEFHGIFMASMTLWFGLVVLAHILSWLYRPWL
25	pufA_1	plus	pending	Thiofri_00877	827590..827811	73	light-harvesting protein, PufA	MNAKSFDGMHKLWMIMNPVSTLWAIFIFQIFLGLLIHMVVLSSD LNWHDDQIPVGYQLQGETLPVNLEMKAAQ	x
26	pufL_1	plus	pending	Thiofri_00878	827944..828765	273	photosynthetic reaction center, subunit L	MALLNFEKKYRVRGGTLVGGDLFDFWVGPFYVGFFGVSAVFFAT LGTMLILFGAAIGPTLNIWQISIAPPDLSVGLGFAPIREGGLWQVITICAVGAFVSWA LRQVEIARKLGMGLHVPFAFSFAILAYLTLVFFRPVLLGAWGHAFPYGLFSHLDWVSN VGYQTLHFHYNPAHMLAISFFFINTLALAMHGSLILSVVNPQKGEEVKTAEHENTVFR DIVGYSIGALAIHRLGLFLAINAAFWSAVCMILTGPFWTRGWPEWWMWWPNLPIW	x
27	pufM_1	plus	pending	Thiofri_00879	828781..829755	324	photosynthetic reaction center, subunit M	MPEYQNIFNKVQVREPAYPGVELPKGSLPRVGKPIFSYWLGKIGDAQIGPLYLGGWGIAS LISGFIALEVIGLNMLASVGWDPRLFLKEFFWLGLEPPPPAYGLSIPPLAEGGWWLIAGL FLTMSLLLWWVRVYKRAKDLGMGTHLSWAFAVAILFFLTLGFIRPVLMGSWGEAPPFGIF PHLDWTAAISIRYGNFYYNPFHGLSIAFMYGSAVLFAMHGGTILAVSRYGGDREIDQITD RGTAAERAMLFWRWCMGFNASMESIHRWAWWFAVFCIINSILGIILTGTVVDNWYLWAVK HGVAPSYPSELTIDNPYLTQGVAQ	x
28	pufC_1	plus	pending	Thiofri_00880	829752..831080	442	photosynthetic reaction center, cytochrome	MKQRNHHALALLSLGVAAFITGCDFPPQDVVQTGYRGLGMQQNY NPKLLQKVIDATQVPDAIPAATPGGALAKDVYKNVQVLGDLSVNEFNRTMVALTTWVA PNEGCTYCHEGTNWESDGVYTKIASRRMLEMTRDTNSNWKGHVADTGVTCYTCHRGKP VPEHVWTTDPGPDIPSVFPSNGQNTIGYNVAYTALPFDPFTPFLLGENEIRVSGNTDL RNTNRKSIKQAEWTFALMTHFSEALGVNCTYCHNSRAFMDWNQSTPKRVPAWHAIRNV RDINIQYVEPLGEVLPASRKGPLGDPFKVNCLTCHQGAYKPLFGVPMAKDYPALYETA AVEEEAPAAEAEAAPAEAAPVAEAPAEAAPAEAEAAPAAEAEAAPAEVAPVAEAPAEA …	x
24	pufB_2	plus	pending	Thiofri_00881	831170..831310	46	light-harvesting protein, PufB	MAEKPSTGLTESEAKEFHGLFMASMTLWFGLVVLAHILSWMYRP WL
25	pufA_2	plus	pending	Thiofri_00882	831407..831667	86	light-harvesting protein, PufA	MNSDKFAGMYKLWTFIDPRRTLIFIVAFQIMLGILIHMIVLGSD LNWHNDGIPRFYSPRPVDVAVGPAGIPLEIPGSPMPQARNYN	x
x	hpnJ	minus	pending	Thiofri_00883	RC_831865..833676	603	hopanoid biosynthesis associated radical SAM protein	MMRKPTTSDSDREIFHLIMIVPARYDEEGYPLQWWRSCMPANSL ATLNGLGRDCRERQVLGPNVDIRLTAIDETNYIIQAPKLIRMIRRDGGKALIAMVGVQ SNQFPRSLDLAQPFVAAGVPVCIGGFHVSGIMATLKEPTPDMQAAMDQGIGFFLGEAE EGRLDQVLLDAYAGRLQPTYNYLEKLPEIAGAPIPILSEGDISRTIGWISSFDVGRGC PYQCTFCTIINVHGRKSRFRTKEDLEKIIVENNDQGIRQFFVTDDNLARNKNWPELLD HLIRVQREMGIQLELSIQVDTRCHQVPNFIPKAVEAGTKIVFVGLENVNPDNLAAAGK PQNRITDYREMLLEWKKYPVAISAGYIVGFPFDTKESLKHDVEIIKRELPVDHIYFTQ …	x
x	hpnJ	minus	pending	Thiofri_00884	RC_833748..835538	596	hopanoid biosynthesis associated radical SAM protein	MHAPPQAAHSDGNIFHLILITPTKYDEDGYPLVWWRSVLPSNSL ATLNGLGRDCRDRHVLGADVKIQLTAIDEANRIVQPRKIIKMVQRDGGKCLIALVGVQ SNQFPRAIDLAQPFLSAGLPVCLGGFHVSGCFAMLPETTPEIQAAMDQGIALFLGEAE EGRLDEILRDAYANQLKPVYDYLGKLPSIAGAPIPILDEEDIKRTMGWISSFDVGRGC PYTCSFCTIINVHGRKSRFRTAEDLEKIVIENDVQGIRQFFVTDDNLARNKNWAALFD TLIRLREERGIVLELSVQVDTRCHQIPGFIDKAAAAGVNTVFIGLENINSDNLATTGK AQNRITDYREMLLAWKKYPVTICAGYIVGLPFDTVESLMRDVEIIKRELAIDHIFFTM …	x
x	psrA	plus	pending	Thiofri_00885	836014..838179	721	sulfur reductase chain A	MSRTVEATCPLCEACCGLLFTLEGDQVTRVRGDRDDPLSCGFMC TKGAALPELHADPDRLRRPLRRTATGWEELDWPAALDFAAAGLRAVKQAHGPDAVAVY RGNPNAHSLGLLLFGHGVIRALGTHNLYSATSMDQLPHMLVALRMYGHQLLMPVPDLD RTGFLLILGANPLASNGSTMTSPAVGQRLRAIQQRGGRVVVVDPRRTRTAELADQHLF IRPSRDALLLAALLQVIFAERLERLGRLGAFVNGLDAVRAAVAPFTPARVAERIGIAA EVITALAREFAAAQTAVVYGRIGTSVQAHGVLCQWLIQLLNLVTGNLDHPGGNLFSSP AVDPIGILRLSKQGTVGRWHSRVRGLPEICGELPVAVLAEEMQTPGAGQVRALLTVAG …	x
x	x	plus	pending	Thiofri_00886	838489..839841	450	hypothetical protein	MDKRVVKANFRTVDFDNHKKLNSVVVYGAVRNHLRTHTYFIFDL WHSKCHIVDLSNLYTLQNFYRCLKTVERNNYKDYKSFPLLRTLFQDGTYTLKQFGVLV GANIPHHIRYIGDKRFWIGNVGTHNALICDLEKQQVTSIIPDTEDVLLGPQISYDEKT GEVFFLTYGINGHLQLTLVDPQFKNRFSIRKWNPKTDEITTVWSDDINCMLVDGFRVT ADQSYAIFSDLRFALDKDCQFDLNAVYVVDLKTQKTWEIPGLKGSAHVEPDPDDPSVF YISEHQIGIIVRDHVTEEEATKNEDLTLIARVKFVTKEVGGFVGAAALHKYRMTPEGP VLLGTYAAGKDFLRATWHFAFKNRGRKYIASISSPYIVIIDAETMTLHKKIDTGLKPL …	x
x	x	plus	pending	Thiofri_00887	840250..841257	335	Endoribonuclease L-PSP	MECLVGNHLVLEYIVDTDALGGNLVNHLCDNDLLVLQERIVSPP EKLSLVKPVSDNPLVILNDSSLPVQRSVVAVQKAGIDSFERLDSGVLLASDDIRLLFS YPFLTGKDISFDSFNEAYRGLEALLLQTGFTETNIARTWFLVKDILRDYDLLNQVRDQ WFAKWFKKGDFIPASTGIQSRINQEGYFSLECLAVDGAGIAVEQMHCSLQNEPIEYGK MFSRGILLSMAQSRIALISGTASTDKFGEVKYFGDIARQCQHMLDSVSDLLNGVGMDF ENVAQAMLWLKHGEDRELCLDILSRNGFPLERCVLQLDCDVCRDEWLCEMEITAVKNA S	x
x	x	minus	pending	Thiofri_00888	RC_841457..841672	71	hypothetical protein	MDLPKNVGDQDRNIRFAVGGLLVLAGLFTVNAIVTVLGFIVVGT GYMRTCLAYVPLNINTMKKGDGKTESK	x
x	x	minus	pending	Thiofri_00889	RC_842007..842117	36	hypothetical protein	MNALQCFAIGVIKLISDGTLAAAIQRLARLPRLVFD	x
24	pufB_3	plus	pending	Thiofri_00890	842866..843006	46	light-harvesting protein, PufB	MAEKSTTGLTEAESKEFHELFMASMTLWFGLVVLAHVLSWMYRP WL	x
25	pufA_3	plus	pending	Thiofri_00891	843089..843322	77	light-harvesting protein, PufA	MNAKSFDGMHKLWMIMNPVSTLWAIFIFQIFLGLLIHMVVLSSD LNWHDDQIPVGYQLQGETLPVNLEMKAALKDAQ	x
26	pufL_2	plus	pending	Thiofri_00892	843446..844267	273	photosynthetic reaction center, subunit L	MALLNFEKKYRVRGGTLVGGDLFDFWVGPFYVGFFGVSAVFFAT LGTMLILFGAAIGPTLNIWQISIAPPDLSVGLGFAPIREGGLWQVITICAVGAFVSWA LRQVEIARKLGMGLHVPFAFSFAILAYLTLVFFRPVLLGAWGHAFPYGLFSHLDWVSN VGYQTLHFHYNPAHMLAISFFFINTLALAMHGSLILSVVNPQKGEEVKTAEHENTVFR DIVGYSIGALAIHRLGLFLAINAAFWSAVCMILTGPFWTRGWPEWWMWWPNLPIW	x
27	pufM_2	plus	pending	Thiofri_00893	844283..845257	324	photosynthetic reaction center, subunit M	MPEYQNIFNKVQVREPAYPGVELPKGSLPRVGKPIFSYWLGKIG DAQIGPLYLGGWGIASLISGFIALEVIGLNMLASVGWDPRLFLKEFFWLGLEPPPPAY GLSIPPLAEGGWWLIAGLFLTMSLLLWWVRVYKRAKDLGMGTHLSWAFAVAILFFLTL GFIRPVLMGSWGEAPPFGIFPHLDWTAAISIRYGNFYYNPFHGLSIAFMYGSAVLFAM HGGTILAVSRYGGDREIDQITDRGTAAERAMLFWRWCMGFNASMESIHRWAWWFAVFC IINSILGIILTGTVVDNWYLWAVKHGVAPSYPSELTIDNPYLTQGVAQ	x
28	pufC_2	plus	pending	Thiofri_00894	845254..846444	396	photosynthetic reaction center, cytochrome	MKQRNHHALALLSLGVAAFITGCDFPPQDVVQTGYRGLGMQQNY NPKLLQKVIDATQVPDAIPAATPGGALAKDVYKNVQVLGDLSVNEFNRTMVALTTWVA PNEGCTYCHEGTNWESDGVYTKIASRRMLEMTRDTNSNWTGHVADTGVTCYTCHRGKP VPEHVWTTDPGPDIPSVFPSNGQNTIGYNVAYTALPFDPFTPFLLGENEIRVSGNTDL RNTNRKSIKQAEWTFALMTHFSEALGVNCTYCHNSRAFMDWNQSTPKRVPAWHAIRNV RDINIQYVEPLGEVLPASRKGPLGDPFKVNCLTCHQGAYKPLFGVPMAKDYPALYETA AVEEEAPAEAAPAAEAEAAPAEAVPVAEAPAEAAPVEAAPAAEAEAAPAEAAPAAPPV …	x
24	pufB_4	plus	pending	Thiofri_05042	846533..846673	46	light-harvesting protein, PufB	MAEKTATGLTESEAKEFHGLFMASMTLWFGLVVLAHILSWLYRPWL	x
25	pufA_4	plus	pending	Thiofri_00895	846771..847016	81	light-harvesting protein, PufA	MSNDNFTGTYKMWMFIDPRRALLFIASFQILLGILIHMIVLGSD LNWHSDGIPKFYFPNAAEASAPIDMSPIPSARNFKFD
25	pufA_5	plus	pending	Thiofri_00896	847207..847413	68	light-harvesting protein, PufA	MHKVWKMIDPGRVVLTIFGFQAMLGLLVHSIVLGADPNWPDDGS APISSPSEMLSELDPKNQSERLAR	x
x	x	minus	pending	Thiofri_00897	RC_847595..847876	93	hypothetical protein	MHDLSKEQQILIAMRKTLAAIVKDVTPPPGMKHPLSEATIEDVR QCFGLISAREKELADLDGRGGERPYYPDQDQPAQVISVTKIGKKTPGIH	x
x	pigA_1	minus	pending	Thiofri_00898	RC_848032..850080	682	DNA ligase	MKDKIPAGSSAARASELRTLLEHHNYRYYVLDDPEIPDAEFDAL LRELQQIEEQHPDLRTPDSPTQRVGASPAERFAPAEHLAPMLSLGNARTADDLRDFDQ RIRRELGIEQVHYVAEPKLDGLAISLVYEDGLLTRAATRGDGRTGEDVTAQVRTIGAV PLRLRGTGWPRLLEVRGEVYLPLAGFEALKQRMLDNGQTPVKNPRNAAAGSLRQLDPT ITASRPLAIFCYGFGAVEGGNLGSTQSDALAHLRAFGLRISPESTCVTGAEGCIQYQE AMAARRDGLDYEIDGVVFKVDDLTAQRRLGFRARDPIWAIAFKYPAREEQTRVRAVEF QVGRTGAVTPVARLEPVDVAGVTVSNATLHNIDEVHRKDVRVGDTVIVRRAGDVIPEV …	x
x	rplU	minus	pending	Thiofri_01150	RC_1134322..1134699	125	50S ribosomal protein L21	MYAVIRTGGKQYRVAEGDKLRVEKLVADEGAEISFDEVMMLADG DQVQVGKPFLSGQQVQARVLSHGRGKKVKIIKFRRRKHHLKRQGHRQSFTEVRITGIG GASSAASARPAAVSAPVEAAAAA	x
x	pglF	plus	pending	Thiofri_01151	1135090..1136925	611	UDP-N-acetyl-alpha-D-glucosamine C6 dehydratase	MVPLAWLAAYWVRFNLEAVPVWFFDQALVALPLLMLVQGGVFWF FGLYRGVWRFASIPDLQRIGKAVLAGVILGTVILFMLNRLEAMPRSVPLLYSVFLLFL LGGSRFAYRGYKDRRLYGRDTKNVLIVGAGRAGEILVRDLLRQPELGFSPVAFVDDDH SKEGKEIHGVRVVGSVDRVPFFAKNHSVELILIALPGGSSRQVRRVVEVCERSGVPFR ILPQTRDLVSGQVSIKELREVAIEDLLGRDPIRLSWGTVTEHVARKCVLVSGGGGSIG SELCRQLAGLDPSSLVIVENGEHNLYKVEQELRGSFPCLALHAHLVDVRDRVALEWVF AHHRPDLVFHAAAYKHVPMLEGQVREAIRNNVLGTVTAAQTADRYGCGAFILISTDKA …	x
42	pucC	minus	pending	Thiofri_01152	RC_1137131..1138570	479	PucC family protein	MSTNNTQRNEFKQLGMELLQRFLPFADAATDDLPLPRLLRLSLF QISVGAAIVLLNGTLNRVMVVELGMPVWVVSLMVALPLVFAPLRALIGHRSDYHRSAF GLRRVPYIWWGTALQFGGFTFMPFALLLLSDPGNNAAAVGYVAAAVAFLFVGAGLHTT QTAGLALATDLAPVEARPRVVALLYVTLLLGMMLSAILYGLFLQDFDQVRLVQVIQAT AAMTVALNLVALWRQEAIDRKRAANPVRAPKFSATWKAFIKDRYAARLLVVVGLGTAA FSMQDILLEPYGGEVLGLTVSQTTLLTAIWAGGTLIAFSLAGWLLTKGGNPNRMAAIG AALGLFAFVAVIVAGLLSMPWLFRTGAGLIGFGGGLFAVGTLTAAMGLAQGGHTGLAL …	x
38	bchB	minus	pending	Thiofri_01153	RC_1138614..1140218	534	ferredoxin:protochlorophyllide reductase (ATP-dependent), subunit B	MELTVWTYEGPPHIGAMRIAASMDAVHLVLHAPLGDSYADLLFT MIARSPARPPVSYTSFQARDLGGDTAQLVKTRLAETVARFKPQALLVGEACTAELLQD QPGALATGMGFDIPVIPLELPAFTRKESWGASETFHQLVRSLLSGRPVPEGAGDPASR AKAEGRRPRANLLGPTALGFRCRDDVAEVTKLLDTLGVDVHLVAPAGATPADLVRIPE ADFNLCLYPEIAHSTCIWLERMFKQPWVRTVPIGVGATRDFLLEVARLAGADPEPALA QARTRLPWFSRSVDSTYLTGKRVFIFGDATHVMAAVRIAREELGFDVVGLGSYSREFA RELRALAEEIGVEALITDDYLAVEAQVAELHPELVLGTQMERHIAKRLGIPCAVISSP …	x
37	bchN	minus	pending	Thiofri_01154	RC_1140232..1141527	431	ferredoxin:protochlorophyllide reductase (ATP-dependent), subunit N	MTETASSSSTTAHPAGSSSALPIRQERGERQAFCGLSGIVWLHR KMQDSFFLVVGSRTCAHMMQSAAGVMIFAEPRFGTALLQDRDLAGLADANDELDRVVR ELLARRPDIGTLFLVATCPSEVIKLDLDTAAARLQQSHNGRVRILAYSGSGLDTSFTQ GEDTCLQALVPHLPELPAMERSLLVVGSLADVVEDQFKRLFDKLGIGPLHFLPPRRAA DLPPVGPGTFLIAAQPFVGETIDALRERGAHLIAAPFPLGIQGTRAWLHAVAAAWGVA PELVDEVIAAPAARAETALARYREQLSGKRVSFLPDSQLEIPLGRFLARECGMQLGEL GVPYLDRRLMEPELALLPANTRLTEGQDLEPQLERLRAERPDITVCGLGLANPLEAEG …	x
36	bchF	minus	pending	Thiofri_01155	RC_1141524..1142015	163	2-vinyl bacteriochlorophyllide hydratase	MTRPIPPLYTPEERRRRDESPWTLVQGILAPVQFLVFLVSLVLV LRYLATGSGELAATWSIVIKTLILYTIMITGSIWEKVVFGKYLFARSFFWEDVFSMLV LAQHTAYLGALLTGWLDTRGQMWLALAAYATYVVNATQFLLKLRAARLSSQANATAGE NAA	x
34	ppsR	plus	pending	Thiofri_01156	1142679..1144109	476	transcriptional regulator PpsR	MFDAPESALGELGTDAAAELIAAASDIALIIDGEGRILDLAFGN DELSNQIGDWVGLNWADTVTNDSRARLEQLLDSARADEQPPHWEQIEHVALSGDELPV RYCAASLGDRHRIVAVGRSQQGIAALQQRLVDAQQSLERDYWRLRQLETRYRLLFRSM SEAILIVDPVNGKIVEANPAASLLLATDSRKLVGRPFPEGFDTKSTEAIKSLLAGVRS AGRGSDVRARLRESETEFLVSAAPVRQENATLLLVRLTPVETNNNSGMLGEPRSRLFK MLENAPDGVVITRQDGRILSANNAFLELAQLSTEEQARGESLDRWLGRPGVDLNVLIA NLRQHGAVRLFATTVRSDYGSSTEVEISAVAVQNADQPSFGFIIRNVDRRVSASSGAG …	x
33	bchG	plus	pending	Thiofri_01157	1144126..1145049	307	bacteriochlorophyll synthase 33 kDa chain	MSEASSPPSQAPTQIEPTRIKPADVLEFMHPITWFPPMWAFTCG VVSSGQPILTNMLVLIAGVILAGPLLCATSQAVNDWFDRHVDAINEPDRPIPSGRIPG RWGLYIAIIWSAMSLLWSLWLGPWVIVATLLGIALAWAYSAPPARLKQNGWWGNAAVG FSYEGLAWVTGTAVMLGGMMPDWRSLTLAFLYSIGAHGIMTLNDFKAIEGDKQLGVRS LPVQLGADRAALLACIVMIAPQLIVIGLLFGWGQPWHGWAVTALVAGQSAMMLRFLQA PIERATWLSAFGVTLSVSGMMISAFAARALV	x
x	x	plus	pending	Thiofri_01158	1145072..1145194	40	hypothetical protein	MMTDTEIRVAGLQAPISALGSIEAERFLATMSRERFDYTK	x
31	bchP	plus	pending	Thiofri_01159	1145312..1146556	414	geranylgeranyl diphosphate reductase	MSELETFDVVVIGGGPAGATAATDLARRGRSVLLLDRPGRIKPC GGAIPPIAISEFEIPDEQLVAKINSARMVAPSERHVDMPINGGYVGMVDRAPFDEWLR ERAAAAGATRRNGSYQRIDRDSDGTAIVHFQPEEAGSKAEAKPAPEQVRARAIIGADG AMSRVAKDCVPGAKELPHVAAYHEIVRSPDANHGDFDPTRCDVYYQGKISPDFYGWVF PHGETTSVGVGTELKGFSLKQATADLRKAAGLEDCETLRCEGAPIPLHPLKKWDNDRD LVLAGDAAGVVAPASGEGIYYALTGGRLAADAVEQFLITGDAKALAQARKRFMKAHGR VFWILGIMQRFWYKSDKRRERFVSLCDDPDIQHLTWEAYMHKRLVRAKPAAHLRIFLK …	x
x	x	plus	pending	Thiofri_01160	1146815..1147099	94	hypothetical protein	MESLFASGRIIDPILIMVLVEAVVLWLLHRATGRGPGLKPLLPL LASGFLLLLAVRAALVQAPWPLIALPLAAALLTHILDLLLRWPREHPSRQ	x
x	gmr	plus	pending	Thiofri_01161	1147099..1149723	874	Cyclic di-GMP phosphodiesterase Gmr	MASPPSQSPTASHRGNEQRFRTLVEVNQVAIMELDTQGRFRYAN PAACRMLGYTHERLVQMEVADLLPAEEAEQLHRDLAYFVAEQPEPFTYTNHNRTGDGR WIEVQVDWNYLRDDSGAVIGFVSISSDITAFRLSQRLLDGRNAVLERLARGAPLEEML RAIVDYSQDIMRDAWISIHLLDAECGKLHSAISSRLPTSYLQAVEGVRIGPNVGSCGH AAFTGERTIASDLRSDPKWDGYRDLVLPLGLLACWSEPILGRDGHVLGTFAIYLPDAR APEPADLQLIASAAELASIVIEHQEDANARRVAEERAQLLLNSTVEGIFGIDLDERIS FANPSTARLLGGSAEAITTADLIGRDPHALFHYANAAGEPLPRSECRMLRAAREACQQ …	x
x	x	plus	pending	Thiofri_01394	1431319..1432866	515	putative AAA-ATPase	MSRKKLPIGVQTFATMREDDYYYVDKTGFALRLIDEGSHYFLSR PRRFGKSLFLDTLAELFSGNREFFNGLVAENQWDWSRRHPVIRLSFGGGVLRSRAKLE EKIDELLTDNLERLGLSATHRSPSGRLQQLIKSAATAYGEKVVVLVDEYDKPILDNLG DKETARAMRDGLRDLYSVIKDSDAHLRFVFLTGVSKFSKVSLFSGLNNLKDITVDSRY SALCGYTEKDMDEVFGPELEGLDREKIRAWYNGYNWTGDAVYNPFDVLLLFDSRLFRP WWFETATPSFLIEVLTARQTFAPKLGRLIANDRLLSAFDVDYIATEALLFQTGYLTID SMRERGATTEYRLRYPNLEVRASLNGALLDALSARSSAVAEHSSRLYDLLLANDFSGL …	x
x	x	minus	pending	Thiofri_01395	RC_1432961..1434388	475	Ribonuclease	MHIKHHGAINGVTGSCHELGLEDGSSLLIDCGLFQGAEAGADGA GAAHLEIGFDVAPVRALVLTHVHIDHCGRLPYLLAAGYRGPILCSPASSELLPLVLED ALEIGVTRNRKLIEQVLAVVKERTIALPYGQWHQVTDKLRIRLQPAGHILGSAYVECD VHDSDKGMRSAMDGSGDKSGRRVVFSGDLGAPDTPLLPGPQPPERADVLVLESTYGDH NHQDCSARVERLRAAIEHALADGGTVLIPAFSIGRTQELLYELEELFHQLGETAATWR DLQIVLDSPLAADFTRGYQRLRKHWDAEAKSRIRQGRHPLAFEQLITVDTHDAHQRMV NYLAHSRQPAVVIAASGMCAGGRMVNYLKAMLGDPRHDVLFVGYQAAGTPGRDIQRYG …	x
52	bchE	minus	pending	Thiofri_01396	RC_1434445..1436211	588	magnesium-protoporphyrin IX monomethyl ester anaerobic oxidative cyclase	MRILFIHPNYSAGAADIAGNWSPAWVAYIAGYLKSGGYQDYQFI DGLVDKLDDEQMRAAIRAAQPDIIATTAMTPMIYAAQRVLQIAKEEHPNAITVLGGIH GTFMYNQVLDEAPWIDVIVRGEGEAVTLNLVRCIDEGRWPAERESVRGIAFLDENGKV IAPEAEPSISDVDAIWPDWGILEWKKYIYIPLGVPVATPNMARGCPFTCSFCSQWKFW RDYRVRNPKRMVDEIEELVKVHGVGFFILADEEPQINKKMFVDFCQELIDRDLGIHWG INTRVTDVMRDEDLLPFYRKAGLVHVSLGTEAAAQLNLDRFVKETTIEQNKRAVRLLQ ENGIVTEAQFIVGLENETRETLEETYNMVMDWGADMANWSMYTPWPFSDMFTEMGDKV …	Singleton
x	cobD	plus	pending	Thiofri_01397	1436408..1437457	349	Threonine-phosphate decarboxylase	MTQGFVDSCHSGEGDALAHGGRLQEAAARFGIARADWLDLSTGI NPSGWPVPPVPASSWQRLPEDNDGLETAALDYYGCDALLPVAGSQAAIQALPWLRGPS RVALLAPAYAEHAAAWRAGGHQVTGVDALCGRQALAPRVDELVDGSDVLILVQPNNPT GLRFSHEQLLDWRRRLAERGGWLIVDEAFMDVTPEHSLAACCPQPGLMVLRSLGKFFG LAGARVGFVLAEPDLLARLRRRLGPWTLTGPARWVATQALCDQDWQLQTRAALVAAGQ RLSDLLSRHGLPPAGGCALFSWVCDDRAEAIWVQLAGQGILTRLFREPPSLRFGLPGD EQAWQRLERALRGLG	x
x	pyrF	plus	pending	Thiofri_01398	1437507..1438232	241	Orotidine 5'-phosphate decarboxylase	MTQDSLSTKAIPVDERLIVALDLPDADAAKDLVRGIGPACRFYK VGLELFMAGGYFELVEWLRAQDKRVFCDLKFFDVPETVGRAVRRLRDREVDFATVHGN DTMLEAAAREKGEVKILAVTVLTSLDRSDLDSLGFACDVEELVLSRARKALRLGCDGV ISSGLEAPRLRADLGENFLVVTPGIRPVDNRPVDDQKRTVDIEQAFRNGADYVVIGRP IRDAADPRLAAEQAQRQIAGVFG	x
x	barA	plus	pending	Thiofri_01407	1448132..1451404	1090	Signal transduction histidine-protein kinase BarA	MGSEISDKVASREEHDRFRLVFDNSLIGIFVVDCDRRIIEINDR ACQLFGHDAAELLGESVEVLHLSRASFQRFGQEVFSRIRSTGVADVHYELKRANGEVF QAALSGRPLNGVDRADGVIWVIDDISRTARAENALRASEERFALAVAGSNAGIWDWDI PTNRVYFSPRWKELIGYRDEEIPNRFEEWVERVHPDDLSGANAAIEAHLRGETELLAT EFRMRCKDGSWRWILGHGLCVRDEQGRPLRMAGSNSDVDARRRAEDRARAQEAHLAAV LDTVQTGIVVIDHDLREVVDANEQAARILGTVREELIGSLCSEHLCLNPNACPFERGV PENWRSVSNDESVFVRADGTQVSVLKSLAPLQTAESNLLIESFVDVTPMKQTEQALRR …	x
x	pleD	minus	pending	Thiofri_01408	RC_1451397..1452665	422	Stalked cell differentiation-controlling protein	MISAPPEKALLVEDSRSLRQYLAEAIHEIADIQVTSAGSLKQAR QLIDDQPQEYFVGILDLNLPDAPDGEIVDLVAKAGIPIIVLTGFMDDSLRERILAKPN VIDYVVKTNASEIDYVARLVRRVHRNHQIKVLIVDDSSSFRLYLQQLLSTHRYQTLEA ANGEEALKVLQQHPDIRLMLTDFHMPKMDGQTLIAQARRHFDRNQLGIIGMSDQSAPI TSAKLLKAGANDFIAKPFLIEEFYCRITQNIETLEFIHFMRDSAVRDFLTQLYNRRYL FDVGTKAYTHAKAQNSGFAAVVVDIDHFKQVNDTHGHFIGDRVLQHVAKAMQKSTHKE DLLVRYGGEEFCLLIHGERASEHLAEELERIRRAIAELEVPNGNEVLKVTASLGATVN …	x
29	dxs1	plus	pending	Thiofri_01409	1452928..1454856	642	1-deoxy-D-xylulose-5-phosphate synthase	MPDASAADAALATYPLLEQIQDPADLRSMSSEQLKELAAELRAF LIDSVSRTGGHLAAGLGVVELTVAIHHVFDTPHDRLVWDVGHQAYPHKILTGRRDRMH RMRMKGGLSGFPKRSESRYDTFGVGHSSTSISAALGMSIAARVKGEQRQVIAVIGDGS LGAGMAFEALNHGGPLDPDLLVILNDNEMSISPPVGAISRHLSRLLSSRVYTSVREGS KTALRSMPHLRHLVGRWEEHMKGMVMPSTMFEEMGFNYIGPIDGHDMDDLVATLNNMK AMPGPRFLHVSTQKGRGYEPAEGQPVQFHGVTPFDSKTGRMHKKAGGKTYTQIFGDWL CEAAEKEPRLLAITPAMREGSGMVAFSERFPERYFDVGIAEQHAVTLAAGMACEGMKP …	Singleton
x	gloB	plus	pending	Thiofri_01410	1454862..1455650	262	Hydroxyacylglutathione hydrolase	MRIEPIPAFADNYIWLLRQPQDPRVAVVDPGDAQPVLDYLAAQH LELTAILITHHHRDHIGGVAALQSAWPRAEVIAPEDPRIPGATHSVGDGERFRLEGLE IDLQVLAVPGHTSSHIAYLTAEADHPALFCGDTLFSVGCGRVFDGTVEQLAVSLRRIA ALAPETRCYCAHEYTLENIGFARWVEPENPALAERALEAERLRAAQKPTVPTILASEL ATNPFLRVDQPEVMVAAERAAGHKLNGPTEIFAALRRWKDDDYD	x
x	lnt	plus	pending	Thiofri_01411	1455667..1457184	505	Apolipoprotein N-acyltransferase	MPFLTRLSPRWCWLLAPAAGAATVLAFAPFGWYPLGILALALWY QCLRGRSGRGAFVHGWLYGAGLLGVGVAWIRISLNEFASLPAIAANGMMLLFVAAMAL YYGLAGWLMGRVQPALQRAGHDWAGAVLLLPAVWVLGEWLRSWFLTGFPWLLLGNTQV DSPLAGWAPILGVHGLSLLAALSAGLLWLAVAERRARVAALIALLLLWTSGGLLRMIE WTQPAGQPFTAALVQANIAPSLKWQPDALEPTLEAHLELTREHLGAGLIVWPETAIPS FLHEVRRPLIDPLSERARAEGSEIVIGVPIMENDRRYYNGLLSIGTSEDSYYKRHLVP FGEYLPLRGLIGPLVDWFEVPMSSFSPGHAEKPLLRVGDHFAGASICYEDVFPDQVRQ …	x
x	x	plus	pending	Thiofri_02234	2325556..2326485	309	putative protease	MTPAETQAASRPGPRLSLGPIGYYWPKETVDAFYAQVAQLPVDI VYLGETLCSKHKELKFEDWLAIGERLVESGKEVVLSTLSLLEAESELIRLRSICDNGR FLVEANDMGAVNLLQGKPFVVGHSVNIYNDRSLALLARQGLKRWVLPVELTAETLADM QRQRPNGVETEVLAYGRLPLAYSARCFTARARNLPKDDCQYCCIDYPDGLVVATQDDQ SFLALNGIQTLSARTANLLAELPRMRELNVDILRISPQAEHTDEIIRLFDQALRGELT PADAGAKATELTPSGACDGYWHGGAGMALQGAA	x
x	x	minus	pending	Thiofri_02235	RC_2326549..2327043	164	Putative lipid carrier protein	MPLPVQVNSPKKTPTIPRLFTWPLGFVPAKLQTGALTQILNRVF APELSDGELDFLDEKVMRIRVEDVGLEYRLTLTNGKLRAAQPGQAEDLSIEGNAYEFL LLATRQEDPDTLFFNRRLRLGGSTELGLYVKNFLDGLELEPRLGPLLPVMKGATSLMG RLAR	x
30	idi	minus	pending	Thiofri_02236	RC_2327082..2327669	195	isopentenyl-diphosphate delta-isomerase	MSTHATVSFDDEPLILVDSDDTVTGYQNKAQAHEGGGVLHRAFS IFLFNPRGEVLLQQRSGEKPLWPLFWSNSCCSHPRRGESYQEATHRRLREELAVDTEL DFIYRFEYHAPFQDIGSERELCSVYIGRLDDTQAIDVNPSEIADWRWLSLTDTDALVA THGQAEPPERITPWFVMEWQRLRSDFPERIVQLAL	Singleton
x	x	plus	pending	Thiofri_02237	2328411..2328776	121	hypothetical protein	MAIRISAPAENNILEVVYGAEAIGDWEWARDREDVANAISSTNR SRVLIDASALPSFPGLVLIQEHNEQVAANEVLSAAKFAVLFACVGEPEQFLHITGSNR GIRIQCFTSKDDALVWLSF	x
x	x	plus	pending	Thiofri_02238	2329073..2329174	33	hypothetical protein	MIEQTNTTSDATAETARDVDRVAQALKQEIERF	x
x	cbiQ	plus	pending	Thiofri_02476	2599174..2599752	192	ABC-type cobalt transport system, permease component CbiQ	MKDRLLLLGYAIAVVAATSVHNPWWLAAGLLLVAALAGRQVPTI GWRALRAVLFFSLVISIGYAAGALFGQAVSLDYLILVNIRVYLLIFLTFTLAAKIDIL RALSFSRNLTYLVTLVLSQIIPFRRLFEDLRLAAESRRLRRLRLRERYLQSAAAAVHL FDRAEHDAREIALAMRSRGFFQPDAPDNAPGD	x
x	nikO	plus	pending	Thiofri_02477	2599736..2600512	258	Nickel import ATP-binding protein NikO	MLQAIEVSYRLPEGQEILRAIDFRLGREEKVVLLGANGTGKSTL LKVLNGLLPPTTGTVCYDGRVVNRAALREAAFHQRFRRELVLLFQNPDTMLFNPTVFD EIAFGPRQLGLDDVDERVHHWAGELGVAPLLDRTPFKLSGGEKQRVCLAALLILEPKV LLLDEPTANMDPRSTGWLVDFLADLKQTTLVTTHNLSLAGELGERCLVLGEDHRLLYD GPIQDFLSDHDRLTAANLVHRHRHRHGATEHSHFHTHDWD	x
16	crtD	minus	pending	Thiofri_02478	RC_2600647..2602185	512	phytoene desaturase family protein	MSTKRIVVIGAGVGGLVTAIDLARQGMEVTVVEKAQGPGGKMRE IDVAGAPIDGGPTLFTMTWVFEELFADAGASFTDYLSLRQAEILARHAWGADEWLDLY ADQARSADAIARLAGPREGERFRAFCAHARRVYETLEYPYLRSSRPTPLSLVSRIGFT RLGALLEIKPYTTMWRLLGQYFSDPRLLQLFGRYTTYVGASPMLAPATLMLMAQVEQN GIFLVDGGMYQITAALARLAEERGVTLRYATEAQRIEVAGGRAHGVVLASGERLAADA VVFNGDAAALGAGLLGDDASRATTPTRPSERSHSLMAWTITARTEGFPLVRHSYFYSA DYPAEFQDVFERQRLPQGPTVYLCAQDRNDHDGIGPDGPERLQCLTYAPSNGDTHSYD …	Singleton
x	crt	minus	pending	Thiofri_02479	RC_2602379..2603839	486	8'-apo-beta-carotenal 15,15'-oxygenase	MMPEPDSRMIQGVIAEIMRTLTTEVTDQSLPVEGVMPASIDGVY FRNGPGRFERGGQRYAHPFDGDGHITRLDIGPTGVRYSNRFVRTREYLAEEHSGRMRY RSFGTNLPGGLLANLFRVRFKNPANTSVIWHGGRLLALWEGGPPHRLDPDTLDTLGIE TFDGRLRNPYPPPSSWLSPVLPFSAHPRLDPASGELINFGLVSGAPNRLLIYQVDHNG GLSLNQTHALPRFSFIHDFGVTRRWLCFLIPHADFDLASAMLGLKTPVGSLRIRTKQP MQALLIPRSPAQGRPTLIDCDSGFVFHVAQAFDSDDGALVLDVIRYPKYPDFRQFEAI FQHPDPEIMPRLERMVIDPTKGRATTRRLSDHAAEMPISAPEPFGESRRILYSLGAPP …	x
x	acrB	minus	pending	Thiofri_02480	RC_2603874..2606975	1033	Acriflavine resistance protein B	MPRFFIDRPIFAWVIAILITLAGSIAIFELPVSAYPPIAPPQVS ISASYPGASAEVVEKTVTSVIEQQLTGVDDLLYFNSTSRSNGTVTITLTFLSGTDPDI AQVQVQNRLSLAEPRLPEEVVRNGITVAKANNDFLMVVALKSDDPSIDSYALNNIIAA QVLDPIRRLPGVGGATQFGSGYAMRIWLDPDKLRGYGLSAAQALAAVRAQNVQIAAGA IGSEPALPGQGFTASVSAATRFTSADQFGEIILHAKADGSNVRLKDVARIDLGAEAYG HDVHLAGDPIAGFAIQLAPDANALDVAASIRTKMDQLVDYFPAGVGWITPYDSTQFVR ISIQEVVKTLAEAVVLVVLVILLFLQNVRATLIPALVVPVALTGAFAGMYIAGFSINV …	x
x	acrA	minus	pending	Thiofri_02481	RC_2606988..2608199	136	Acriflavine resistance protein A	MMNPMSLRTLAFCVGALFLAGCDKPSGQGVGSGAGGPQMPPPEV SVVTAHPQSTPIMRELVGRLAATRTAQVRARVAGIVLKRVYTEGTDVKSGQVLFQIDP AHLKAKLNAEEAALAKAEADAVNAALTAKRYAELRQKKTISQQDLDTAHANERTTAAA VKEARANVESAQLDLSYATVRAPIAGRAGRALVTEGALVGQNEATLLTTVEQIDPIYV NFSQSGAELQELRHLAAKTQNAKHPATEDAGQVELLLNGKDPYPATGSVDFSDLAVDP GTGAVSLRAVVPNPDRRLLPGMFVTLRLTAGQLDNAFTLPQPVLARDSEGAYVMVVGA EGKVEQRRVETHGMTRTDWILTGDLAEGDRVIVTGLQKVKPGAVAKVAEPRDQIPPTE …	x
x	menH	plus	pending	Thiofri_02992	3197548..3198342	264	2-succinyl-6-hydroxy-2,4-cyclohexadiene-1-carboxylate synthase	MMPGYHTKALGPALDAGISQQPRWLLLHGFTGSHLDWIDLWPRD FPALVMDLPGHGRSPDPKGDFAQEIARLLAALPSSIERIAGYSLGGRIALALMAQAPA RFQELLILSAHPGLEDASERAARCRQDQIWIDLLRDQGIKRFASAWQRQALFRAQHLR APMAVAIQHRRRLSQRPEGLARALACFGLGQMPPTWPAIPVYNGHLHWISGAQDAKFC ALGEQVCQIRPATTHDILPDCGHNPLIEAPDMLKERLETLCGHPGR	x
x	x	plus	pending	Thiofri_02993	3198541..3198798	85	hypothetical protein	MQLDRDSSRAIGFQVVLRGGSTAPTAILLRRARRLIRPLIERIT RLTIANPCDSPGPQLPCARCDSFVDSRFDSGFPSLLALRMA	x
05	bchI	plus	pending	Thiofri_02994	3198801..3199829	342	magnesium-chelatase 38 kDa subunit	MPLAFPFSAIVAQEEMKLAILIAATDQSIGGVLVFGDRGTGKST AIRALAALLPPMRVIEKCTYNCDPEANDAGLCESCRSRRTKDDIKVRKAPVPVVDLPL GATEDRVIGALDLESALTRGEKAFEPGLLARAHRGFLYIDEVNLLEDHLVDSLLDVAA SGENVVEREGLSVRHPAKFVLVGSGNPEEGELRPQLLDRFGLSVEVKTPQDLKTRVQV VRLRDEFEHDPDAFIAKWKRKDGKVRNQIVKAKERLDKVEVPDAALERAAELCMKLGT DGLRGELTLIRAARALAALDGDDAVTDDHLRRVAPPALRHRLRRNVLDDAGSTTRVER AIQELFGS	x
06	bchD	plus	pending	Thiofri_02995	3199826..3201733	635	magnesium-chelatase 60 kDa subunit	MMPAARSESGAPAAQHPPEPAPAQRPDLWQDACMAAALFAVDPA GVAGLSVRALPGPVRDLWLEMLREFLPPETPLRRIPLHIADGRLLGGLDLSATLRAGR PIAERGLLAEVDGGVVLLAMAERVARSTAAHLSAVLDAGEILLERDGLTARTPTRFGV VALDEGADDDERLPNTLIDRFSLLIDLNPLSWRDVQTLPPDVELADILAARARLPKVR VDDDALDALCGTALALGVDSLRPTLAAVRVARVAAALAGREQLAPEDISLAARLVLAP RATRLPMPEQPEDEMPEEPPPPEENQDDSEQDKSPEQEIDKPLEDQVLESAEAAIPAD LLAQLQLGALRARSRTSGKSGATQSGSLRGRPAGTRRGEPSATARLNVIETLRAAAPW …	x
07	bchO	plus	pending	Thiofri_02996	3201780..3202667	295	magnesium-chelatase 30 kDa subunit	MTSTRVLNDKPDWERDAQAWPNRQYSRFLEAGGLRWHVQIAGEG PVLLLIHGTAAANHSWGALLPLLAKQYCVIAPDLPGHGFTSAPDPARLSLPGMAAALK ALLLALDQSPQVAVGHSAGAAILARMCLDGQIDPQLFVSLNGALLPLRGLPGKVFSPV AKLLARSSLVPRIVGHDAKRQGAVERLVDSTGSHLDARGVALYRLLVSSPGHVAAALN MMANWNLDSLARDLPRLQCNLLLLVGSQDQTIPPSEAERLHRLLPGARIQRLDGLGHL AHEEQAETVAQAILNFPAC	x
x	ydjH	plus	pending	Thiofri_02997	3202780..3203775	331	putative sugar kinase YdjH	MPAYDLYALGNALVDMEYSVTPEDLNRLEIDKGVMTLVDEAHQL RIMNHLREHDHHRGSGGSAANSIIALSQFGGQGYYSCKVADDELGHFYLKDLVTGGIA TRDSSFLDQGDTGRCVVLVTPDSDRTMCTYLGISGNLSVHEVDTDALRASKWFYTEGY LVTSDTARVAAIEARKVAEQAGVKTALSLSDPNMVNFFKDGLKEMIGEKVDLIFANEA EAMGMADTDDLNQAVDYLKSVAREFAITRGPEGALIFDGKELIDIDPVPVKAVDTVGA GDMFAGAFLYGLTQGWSHARAGRLASAASAKLVTSLGPRISREESQAILKQVEAA	x
x	nuoN	minus	pending	Thiofri_02998	RC_3203922..3205364	480	NADH-quinone oxidoreductase subunit N	MAFEPVFLATILPELILLTTACAVLVLDLYLNDEQRGWNHNLSI LGLAATLGCVGLVGGSESTLAFSDSFVRDPFGDLLKGVILILTILTFVYSRDYMRERG LWVGEYHVLILFATLGMLIMVSAHSFLTLYLGLELLALCLYPLVALERDSKPGAEAAM KYFVLGALGSGMLLYGISMLYGATGSFGFADVAEVVTAEGIENKILVFGLVFVLIGVA FKFGAVPFHMWLPDVYQGAPMPVVLFLSSAPKIAAFAMASRILIDSLGALQPDWGEIL IILSVLSMGLGNLVAIAQTNIKRMLAYSTISHVGFIFLGLLAGTPEGYAAAMFYTLVY ALMAAGAFGVLAMISVQGVEIQNLDDLKGLNDRDAWLAAMLALMMFSMAGVPPAVGFF …	x
x	mtnA	minus	pending	Thiofri_03782	RC_4063445..4064515	356	Methylthioribose-1-phosphate isomerase	METTKALVAHPDHAVLWHDERLYLLDQRLLPETTAFVACESVQD TAQAITDMVVRGAPAIGVAAAYGVVLAARARVADAGNHWRERIEEDLQRLAAARPTAI NLFWAIERMRAFMAPLDHLDPVPALLAEAKRIHAEDLAANQRIGELGAALIASPTAVV THCNAGALATGGYGTALGVVRSAHAAGKITRVYADETRPWMQGSRLTAWELMESGIPV TLQADGAAASLMAGGEIGWVIVGSDRIAANGDVCNKIGTFGLAILARHFGVKFMVAAP TSTIDLSVASGADIPIEERAAAEVLACGGKRLAPQAAEARNPVFDVTPAALVDAIVTE RGVIERPDGEKIARLMEGECDS	x
x	mtaD	plus	pending	Thiofri_03783	4064823..4066139	438	5-methylthioadenosine/S-adenosylhomocysteine deaminase	MDVELLIHADWILPVDAEDRTLAQHSIAIERGRIAALLPSAEAH EQIQAKTTLKLEGHALIPGLINAHTHAPMALLRGLADDLPLMTWLHEHIWPAEGRWVD PDFVADGTRLALLEMLRGGITCFNDMYFFPEVTARVAAEAGMRAVIGMIVVDFPTRYA ENPEQYFSRGLALHERYRDHHLIRTAFAPHSPYAVSEEPLRRIATLAEELQVPVHIHL HETRDEVTQSLRDHGERPLARLDHLGLLSPLLVAIHMTQLNDEEIDRLAQSGAQVVHC PESNLKLASGFCPVTKLLKAGVNIALGTDGAASNNDLNLLGEMRTAALLAKGVAQSAS ALPAATALRMATLNGARALGLDEETGSLEPGKAADLVALDLRDPHTQPLYNACSQIVY …	x
11	crtI	plus	pending	Thiofri_03784	4066311..4067849	512	phytoene dehydrogenase	MADAAPASSSAKPLAVVIGSGFGGLAAAIRLGARGYHVTVLEKL DAPGGRAYVHHIDGFSFDAGPTIITAPFLLEELWQLCGRRFEDDIDLRPMDPFYRIRF DNGDTFDTNGDAEAMREQVRRFSPEDVEGYERFLETSKKIFDVGFKELGHLPFTHWTD MARIAPKMVALQSYRSVYSMVSSFVKDERLRVALSFHPLLIGGNPLSVTSIYTLISYL ERHWGVHSAMGGTGAIVDGMVKLINGQGGSIRYNTEVAEITTAKNQGPGKGKPRTNGV RLTDGDYVPAEVVVCNADVAWTYQHLLPSIKRRHWTDKKLKNAKYSNGLFVWYFGTKR QYPEVKHHSILLGPRYRGLLDDIFNRKVLAEDFSLYLHRPTATDPSLAPEGCDTFYAL …	x
12	crtB	plus	pending	Thiofri_03785	4067830..4068906	358	phytoene synthase	MPLFIRDSSFADPADLLACRKLLSNGSKSFYAASFFLPKRLREP ATALYAFCRLADDAIDDNPEDHQVALAGLRERLERAYRGNPIDDPADRAFAGAIERFD IPRELPEALLEGFEWDAEGRVYQDLSGVYAYSARVAAAVGGMMAAIMGARSTSELARA CDLGTAMQITNICRDVGEDARNGRIYLPLEWLREAGLDPDAWLQRPVFNEVIGDIVKR LLDTAETLYQRAEAGIAKLPTTCRPGIYAARLLYAEIGQEIARNGYDSVSQRAFVSPT RKLTLLGRAMAVTPLPIKAVCTAAPLEENRFLVDALAVPDPGEVDGAVSAKVLWVLEL FQQLEERERAANAEFGPTTAVSNG	x
x	x	plus	pending	Thiofri_03786	4068913..4069404	163	hypothetical protein	MPSFIGISLTLIGAFFLFQALKTRGIALKLHAARENADQSSEEA PQSSEGAQSDEDAQSGEDGLSEQELFIAARRRRGQEIQSVASGCAPVAAAGFFLLALA VGAIAMVAKGPGRLSLFDALSIPFFAGMFLMKTYYSSLLAQAESTPEAAPTDSKGDSQ NES	x
x	x	minus	pending	Thiofri_03787	RC_4069714..4069998	94	splicing factor, CC1-like family	MNIYVGNLAYGVTQDELRDAFAAYGDVESANLITDKFTGQSKGF GFVEMPNNSEADAAIKALNETPLKGRPIRVNQAKPRAERAPRSGGGGERW	x
x	eutE	plus	pending	Thiofri_04144	4399740..4400771	343	ectoine utilization protein EutE	MNQTPLQIAEQQILPGRRTRVDIPLPSLFTQNRVVLPVHVIHGR LAGPRLFVTAAIHGDEINGLEIIRRLLATSILRHLRGTLLAVPVVNAYGFVRLSRYLP DRRDLNRSFPGSESGSLAARLAATLMQEVVRDSDLGIDLHTGAAHRENLPQIRAALDD FGMLELASAFGAPVMINAEVRDGSLRAESAALGVPVMVYEGGEALRFNELAIRAGLRG ILAVMRYLGMLRGRRSATPTPAIARSTQWARAGQSGVLRQIKPLGSRVVKGAHLATIA DPFGDFDTPVPAPTGGIIIGRTNLPLVTEGEALFHIARFEQTAAAAESVEQLQSLLDP PDDLFVDSN	x
x	degU	minus	pending	Thiofri_04145	RC_4400880..4403702	940	Protease production enhancer protein	MLSPLAFLLTGVLLGALPVSLLWLRARWLQRNPVSASEPVNAAR WSCRLPDHFAESVIVLDGEGVLRFATPSLYKLLGVETPALLGRNMLDFVHPQEHGEII EVLQWLDGDAECEENVTLDTLGVRSRLYSEQRLSTRAGWCWFGWSYTRLPAGDGADAA IIGVGRDISARRRVEQELRQVESILAAVGDPVSFVDTDYIYRYVNAVYERVFGKPRSM IVGHHVADMLGEGVFSARVKPQLDRCFDGEIVSYDAWFELQPGAQSFMSVTYRPCREN AGRVIGAAVIGRDNSALRRARDQTGLALGKFRILFEHFPLGILVVDAAGFITEANPVA HRLLDSAFGRYQGRHIEESYWRLVDANQQPFPIEHSATVRAFRERRVVTDEVVGCPRS …	x
51	bchJ	minus	pending	Thiofri_04146	RC_4403788..4404414	208	bacteriochlorophyll 4-vinyl reductase	MTVSGGQAPQPGAQPARIGPNAIIRVGEALLALESAETADRVFA TAGLSHYRQNLPSEMVPEAEVIALQQALRAELSIEAAGAVSRDAGLRTGDYLLAHRIP KPAQRVLKWLPPGPACRMLLKAVANNAWTFVGSGHYGFEMGRPVRVSIAQCPICRGAT ASLPVCDFYAGAFERLCQILVSPRARVRETQCQALGAPACQFEIDWRR	x
x	hemN	minus	pending	Thiofri_04147	RC_4404411..4405769	452	oxygen-independent coproporphyrinogen III oxidase	MTNMVSVDISPELLTRFSCFDRPDPPAADAWSEGFTGADYRQAL RDVGRNPDDTLALYLHIPFCPGRCLYCGCNTTVTHNSQRIDGYLDALEREVEMVGDAI GAGRDVLQLHVAGGTPNYLNDAQLTRLVELVNDRFRILPETDASIECDPRRTSAGQLE LLYALGFRRVTFGVQDLEPRVQRSIGRIQSIDLVRDVYWMAREVGFDSIGFDLIYGLP EQTPDSFQATLDAVIEMAPDRVACFGYSRGTSLAMHQHAIDIHRLPDDMGRQGLFEQA VKSFLGSGYVWVGLDTFVLDTDELAIAQDEGRLGRNCIGYTTMRADHTIGLGTGAAGD VHGHCVQNEPNLSAWEATIERGEFPIARGHLLNSTDRRRREAIGYLICNLELPLELAE …	x
48	puhE	minus	pending	Thiofri_04148	RC_4406279..4407094	271	photosynthetic complex assembly protein	MLSLALAILYALFLWWFSTGVILFLDRLPARTYRFSLLGATLLG GASVAVVIWVADRADTLGAYLGFTSGVLIWGWIEMTYFMNALTGPRKADCPHDCHQRQ RFWLAIQTSLYHELAIVSVGLLLFALSWGQVNQMAAWTFAVLWWMRWSSKLNLFFGVP NLNEDWLPAHLRFLTSYLAKRPMNLLFPISVTVATVVMALLIEHALDFPPGSFTAQAA VLGASLLALAILEHWFLVLPVADSALWDWVFEPNEVSASKEKQKGSPSETSAQ	x
45	puhC	minus	pending	Thiofri_04149	RC_4407113..4407625	170	photosynthetic complex assembly protein	MSDAFEGRQFPRPLLIGAALLIGFTIAAAAFVRLTGIGKSETEF APVVVERKLFFREIDQSTIEVIAEGAPIAVLDSKEDGFIFGVLRGLGHYRKVSETGKD RPYIVSLRASGRLVLEDPTTGEQLDLRAYGVDNAAAFRELLEAKHLDTSSSSAADPAT GYPTQPDVPR	x
44	puhB	minus	pending	Thiofri_04150	RC_4407654..4408349	231	PH domain-containing protein	MSEFEVEPIPGLPALLPDGEELLWQGTPLWVPLAKRAFHVREVG IYFGVLILLRAGFILSDGDGWDVVLGSALWLVFVGLVTVAILSMLAWFYARSTIYSIS SKRVIFRHGVVVPIAVNLPFKSIESAGLRVHSDGSGDIPLALIAKQKVSYLLMWPNVR PWHFSKAQPMLRAIPDVEDVAELLADALKAEAEAVPSDVAPHHPNSASPESGSTSGAE TASADPLATSSSS	x
43	puhA	minus	pending	Thiofri_04151	RC_4408346..4409122	258	photosynthetic reaction center, subunit H	MEFGYITQYFDLAQVTLWAFWLSLLSVIFFNRREDKREGYPQEA VQIFGKTILTEGFPFMPAPKTFKLPHNGGDVVKPGPERPQYDFKLEQVDRFAGAAYRP VGNPMLAGVGPGAYAVRANKPDLTNAGDPRIVPMRVAKHFAVVDKDPDPRGMTVIGAD GQVGGKVTEIWVDRAEPQVRYLELEAGNKKKVLVPIALCVIKGQKREVKVRSINGIHF NDVPTLSNYDQITLAEEDKVSAYYGAGTLYATPNRAESVL	x
42	lhaA	minus	pending	Thiofri_04152	RC_4409151..4409633	160	LhaA/PucC family protein	MMAAYCLLAQKWLRTASQYPHAADVSTRKLPSGWAQVFRANEAL IGFGGGLFAVGALTTAIHLAHNGQSGLALGVSGAVQGAALGIAIVLGGVPSDLFSWLA VESALEPALTGLSAWYLLVYHLESLFLFATLIAVGLLVRCTGAAKAPSSSRLGLTELP	x
41	bchM	minus	pending	Thiofri_04153	RC_4409630..4410334	234	magnesium protoporphyrin IX methyltransferase	MANASYQQRRSQIETYFDRTAADGWKRLTSDAPLGRIRETVRQG RELMRQTLLDWMPQDLSGCRLLDAGCGTGLFSLAAARRGADVVAVDLSATLIDLARER APGELGGGSVNFSVGDMLDAERGTFDYIVAMDSLIHYEPEDALALIRGFAAQARCAVI FTFAPRTRALALMHAVGQFFPRSDRSPAIVPIAEKRLRALIEQDSALKPWHIGRCERI IRGFYTSQGLELVTAS	x
40	bchL	minus	pending	Thiofri_04154	RC_4410335..4411261	308	ferredoxin:protochlorophyllide reductase (ATP-dependent), iron-sulfur ATP-binding protein	MSLDRLPPGLFGAGSNPPRRPPPDGEGSVQVQLDPDITIGKAKV FAVYGKGGIGKSTTSSNLSVAFSNLGKRVVQIGCDPKHDSTFTLTKSLVPTVIDVLET VNFHPEELHLDDFVFEGYNGVMCVEAGGPPAGTGCGGYVVGQTVKLLKQHHLFDDTDV VIFDVLGDVVCGGFAAPLQHADRAVIVTANDFDSIFAMNRIASAILAKAKNYKVRLAG VIANRSDETNEIDRFNEAVGLKTLAHLRNLDIIRRSRLKKSTLFELDSTPELEQAKAQ YMGLAQALWDGVDPLTVSPMKDRNLFDFLGFD	x
39	bchH	minus	pending	Thiofri_04155	RC_4411258..4415088	1276	magnesium chelatase subunit H	MATKTSTSRSSSRGQSGTTQTCINVVIVTLDSHLAGAAERAQAL LKDEIPGLRLTLHAATEWEADPKALARCHQDIAQGDIILSTMLFMDDHINAVLPALEA RRDQCDALVGCMSAGEVTKLTRMGNFDMTAKQSGVMSILKRLRGGAKKPAGQEGESES SSSNAGASNSSASNSSDGARQMAMLRRIPKILRFIPGTAQDVRAYFLVLQYWLAGSDE NVANLVRQLVDRYATGPRAALRGTIKVSAPAEYPDVGLYHPRLRGRITDKLAKLPTKP PKNADIKGQVGLLVMRSYVLAGNTGHYDGVIKALEARGLRVIPAFASGLDARAAIEKF FFNKGKSSVDAVVSLTGFSLVGGPAYNDSAAAQELLARLDVPYLAAHPVEFQTLEQWE …	x
x	x	plus	pending	Thiofri_04156	4415930..4416475	181	hypothetical protein	MSSDPSPALVQTAENARLAILGWREWIGLPELGLPLIKAKLDTG ARTSALHAFDLDTETDAEGRVWALFGVHPLQDRLDVVVRCRALVLDQRLVSDSGGHRE QRFVIATQLQLGANAWPIELTLTNRDTMRFRMLIGRTALAGRALVDSGHSYAFGRPHD AIARYQPSPNGYNQTTEPSQT	x
x	hisA	plus	pending	Thiofri_04157	4416531..4417295	254	1-(5-phosphoribosyl)-5-[(5-phosphoribosylamino)methylideneamino]imidazole-4-carboxamide isomerase	MLLIPAIDLKDGCCVRLRQGRMDDETRFSDNPVEMAGRWSSAGA RRLHLVDLNGAFAGTPVNGAAIRAIATAYPELPIQVGGGIRDLDTIGAYLDAGVHFCI IGTQAVIEPEFVARACKSFPGHILVGLDAKDGQVAIRGWAETTEHRVEELARRFASDG IGAVIYTDIGRDGMLTGPNLEATARLADAIDVPVIASGGITTLDDVRALAGIAAQLTK GGISGAITGRAIYEGTLDFAEGQRLADSLSAGDRAA	x
PGC proteins of Rhodobacterales without homologs in Thiorhodovibrio frisius strain 970
No	Gene	Strand	Accession	Locus Tag	Range (original)	Size (AA)	Protein	AA	Comment
32	pucC1	x	x	x	x	x	PucC family protein	x	x
47	acsF	x	x	x	x	x	magnesium-protoporphyrin IX monomethyl ester aerobic oxidative cyclase	x	x
04	crtA	x	x	x	x	x	spheroidene monooxygenase	x
13	crtK	x	x	x	x	x	CrtK protein	x
49	hemA	x	x	x	x	x	5-aminolevulinic acid synthase	x	BioF paralog
23	pufQ	x	x	x	x	x	protein pufQ	x
35	ppaA	x	x	x	x	x	regulatory protein Ppa	x
46	PS gene	x	x	x	x	x	hypothetical protein	x
50	cycA	x	x	x	x	x	cytochrome c-551	x
60	pucB	x	x	x	x	x	light-harvesting protein B-800/850, beta chain	x	x
61	pucA	x	x	x	x	x	light-harvesting protein B-800/850, alpha chain	x	x
62	pucC3	x	x	x	x	x	light-harvesting complex assembly protein PucC3	x	x
63	pucDE	x	x	x	x	x	light-harvesting protein B-800/850, gamma chain	x	x
									x
									x
Marker proteins of the Calvin cycle in Thiorhodovibrio frisius strain 970
x	ribH	minus	pending	Thiofri_00008	RC 10516..10983	155	6,7-dimethyl-8-ribityllumazine synthase	MIQSLEGSFRPASLRFCLIVARWNSFIVDHLEAGALDTLKRHGV EEQNITILRVPGAFEIPLVLQKVAAKGGYDAMIALGAVIRGGTPHFDYVAGECVKGIA QVSLAHGVPVGFGVLTTDTIEQAIERAGTKAGNKGAEAALSALEMANLFGQLG	x
x	ribBA	minus	pending	Thiofri_00009	RC 11021..12172	383	Riboflavin biosynthesis protein RibBA	MSLNSTEEIIQDLRDGRMVIIMDDEDRENEGDLLLAAECVTPES INFMAKYGRGLICLTLSKERSERLRLPLMVDNNRAPHSTAFTVSIEAAVGVTTGISAA DRARTVQAAVAADACPTDLVQPGHVFPLIAQPGGVLVRAGHTEAGCDLARLAGFEPAA VIVEILNEDGSMARRPDLERFATDHGLKIGTIADLIHYRVANEKAVVRLDRCNLPTEF GPFVLTAYRDTIDGAIHLALTHGEISPDRPTLVRVHLQNSLCDLFAGAHAACGWPLTD VMRQIVAEGEGVIVVLRNRDTNHDILDKVRQIREATDSEQQFIPRTDGSELRTYGIGA QILADLGLRQMRVMSAPKTMHAISGFDLEVVEYVGGAEKGPAANGSSIP	x
x	ribE	minus	pending	Thiofri_00010	RC 12215..12871	218	Riboflavin synthase	MFTGIIQAMGRIARVEKREGDARLSIQCPEFDLKQTQIGDSIAV NGVCLTLVGLMSDGFSADVSRETLSLTTLGDISAGSAVNLERALTLATPLGGHLVSGH VDGVGTLVDVHEDARSLRLQIHAPAELAPYIARKGSIAIDGISLTVNDITGSLFSLNI VPHTRQMTTVAHYRNGWRVNVEVDLVARYLERLMLGPHSCTRDGSSLSKELLARHGFL	x
x	prk	minus	pending	Thiofri_00011	RC 12874..13764	269	phosphoribulokinase	MSKKHPIVAVTGSSGAGTTTVKRAFEHIFHRDGIRSAVIEGDSF HRYNRVEMKAEMAKAAAEGRNLSHFGPEANSFDLLAELFQTYGDTGMGKRRYYLHSDE EAAHHNEQLGTQLKAGEFTPWNDLESGTDLLFYEGLHGLVVTEEDNVAQHVDLGVGVV PIVNLEWIQKIHRDNLERGYSAEAIVDTIMRRMPDYIRHITPQFSLTDINFQRVPTVD TSNPFIARDIPLPDESFVIIRFRDPEQLHIDFPYLLSMIHDSFMTRRNTMVVPGGKMG FAMEVILQPIIERMMDARNV	x
x	x	plus	pending	Thiofri_00012	13890..14318	142	secondary thiamine-phosphate synthase enzyme	MQMVLDELTLATHHPIEIIDVGQQVRERCNRAGIRSGLATLISR HTTARVNLNEREPQLQQDMLTFLKRFIPRDGDYQHNIAPVDDRDNAHAHLLGLFMNAS ESIPIVDGELLLGEWQSVFFVELDGPRPSRTLTLQFLGQD	x
x	rbcL	plus	pending	Thiofri_00013	14322..15617	431	ribulose-bisphosphate carboxylase	MKASDARAFFASPESLALDDYLLLDYVFECQDDPELAAAHLCSE QSTAQWKRVDVSEDYRPRFAAKVLDLNIEPVPTGFSVPMPEFGDQQVHRCRIRIAHPH ANFGPRLPNLLSAVLGEGAFFAPGIPLIKLLDIAFPDAFLSAFQGPRFGIGGIREQLK VFDRPIFFGVIKPNIGLPPEPFAELAYEAWRGGLDIAKDDEMLADPDWSPLAERARLL GAARRRAEQETGVPKIYLANITDEVDRLLELHDTAVAAGAGAVMLNAWPTGLSAARML RQHTKVPLVAHFPVIAAMSRLPFYGVHSRVLTKLQRLAGFDVIIMPGFGNRMMTPAEE VRACIHACVDPAFGQLKPSLPVPGGSDSAATLESVHAQVGSADFGFVPGRGVFSHPQG …	x
x	x	minus	pending	Thiofri_00014	RC 15600..15881	93	putative Fe(2+)-trafficking protein	MSRMVQCIKLGREAEGLERLPYPGPLGQRIFEQVSKEAWGSWLK HQTMLINENRLSPMDPKARRFLEQQMEQFFFGDGAEVPEGFVPPSTKGG	x
x	mutY	minus	pending	Thiofri_00015	RC 16074..17186	370	A/G-specific adenine glycosylase	MTAAWLPEAFANAVLEWFAHFGRKNLPWQLEPTPYRVWVSEVML QQTQVAVVIPYFERFMGRFPSVSALAKAEPDEVLQLWAGLGYYARARNLHRAARVVID QHGGMLPQELELLMALPGIGRSTAGAILSLAGGQAHAILDGNVKRVLARCFAIAGWPG ASRVQKRLWVLADDLLAAANRVGSTQMQPGRLSAAGAYNQGMMDLGATVCTRTAPDCD PCPLSRHCLALGTDSVRRYPESKPRRPLPRRATRWLLVQDSDGRILLEQRPPTGLWGG LWTLPEVALQESSADWCAQHLGQAANRVEKLANRRHSFSHFQLDIHPERLAIAALADR VGEDDARLWMALESASKMAIPAPVKALLLELLAADL	x
									x
									x

## Sheet: Table S6B-Twino-DSM6702
Table S6B: Operons of the photosynthesis gene cluster of Thiorhodovibrio winogradskyi DSM 6702 (T)
Order of genes in the PGC and localization on the plus and minus strand. The color code and numbering of proteins is corresponding to those of Dinoroseobacter shibae DSM 16493 (Brinkmann et al. 2018). Protein accession numbers are highlighted in blue, corresponding locus tags are shown in black.
Operons of the "Photosynthesis Gene Cluster" (PGC) - Thiorhodovibrio winogradskyi DSM 6702 (Chromosome; 5,478,625 bp [Accession pending]).
No	Gene	Strand (RC)	Accession	Locus Tag	Range	Size (AA)	Protein	AA	Comment
x	frzCD	minus	pending	Thiowin_00722	RC_767861..769738	625	Frizzy aggregation protein FrzCD	MFKNQSLSIKRLFLLLAVAGVLLVLLLLIALWTASQAQTELARV YEQRYQSYLLADQLRQSSDDLTRMARTYVVTGDPGFERQYWEVLAIRNGEHPRPEHYE RIYWDFVAAGDQQPRPDDETIALRELMRQAGFTEAEFAKLAEAQANSDALVDTEMVAM NAMKGHYRDDSGDFSQRDQPDPALARRLMHDQDYHAFKARIMRPVDEFFVLLDARTGM AVAEAREHSRTSYRQVIVLVSLGLVLGILVLFLLYRWLRAQLGGEPAYVRGIVETIAD GDLQAPIKRHARDHDSLLAAMASMRASLAKMLGDIDNHTEQLTDSAERLADTAGIIAR SGDMRAGANQSIAAAVEEMSSSVAEITSTMEELSASSTQIADHSQAVVDVASRTLDSS …	x
x	gmr	minus	pending	Thiowin_00723	RC_769751..772663	970	Cyclic di-GMP phosphodiesterase Gmr	MDSLFTSGRIIDPILIMVLAEAVLLWFLRRATGRGPGLKPLLPL LASGFLLLLAVRAALVGASWPLIALPLAAALVTHLADLLLRWPREPPPPAVMSGSASH TLPASHRDSDQRFRTLVEVNRVAIMELDTRGRFRYANPAACRMLGYSHERLTQMEVAD LLPAEEAERLHRDLAHFVAEQPEPFTYTNHNRTGDGRWIEVQVDWNYLRDDKGAVIGF VSISYDITAFRLSQRLLDGRNAVLERLARGAPLEEMLRAIVDYSQDIMRDAWISIHLL DAERGQLHSAISSRLPPSYLQAVEGVRIGPNVGSCGHAAYTGERTIASDLRSDPKWEG YRDLVLPLGLLACWSEPIRGRDGQVLGTFAIYLRDARAPEQADLRLIASAAELASIVI …	x
31	bchP	minus	pending	Thiowin_00724	RC_772750..774030	426	geranylgeranyl diphosphate reductase	MSEIQTYDVVVIGGGPAGATAATDLARRGRSVLLLDRPGRIKPC GGAIPPIAITEFEIPEEQLCAKIHSARMVAPSERHVDMPINGGYVGMVDRGPFDEWLR ERAAAAGATRRDGSYKHISQDSDGTSIVHFQPEPERKPADAQSGAKTDTKPALEQVRA RAIIGADGAMSKVAKDCVPGAKELPHVAAYHEIIRSPSSSQTAGQTAGQSSTDHADFD PTRCDVYYQGKISPDFYGWIFPHGETTSVGVGTEQKGFSLKQATADLRKAAGLADCET LRCEGAPIPLHPLKKWDNDRDLVLAGDAAGVVAPASGEGIYYALTGGRLAADAVEQFL ITGDAKALASARKRFMKAHGRVFWILGIMQRFWYKTDKRRERFVSLCDDPDIQHLTWE …	x
33	bchG	minus	pending	Thiowin_00725	RC_774090..774992	300	bacteriochlorophyll synthase 33 kDa chain	MTESTSKAVPHRIKPADVLEFMHPITWFPPMWAFTCGVVSSGQP ILANILVLIAGVILAGPLLCATSQAVNDWFDRHVDAINEPNRPIPSGRIPGRWGLYIA IIWSLMSLLWSLWLGTWVIIATLLGIALAWAYSAPPARLKQNGWWGNAAVGFSYEGLA WVTGTAVMLGGMMPDWRSLTLAFLYSVGAHGIMTLNDFKAIEGDKQLGVRSLPVQLGP DRAAFLACLVMLVPQALVVALLYGWGQSWHGLAVSLLVAIQAAMMVRFLKAPIERATW LSAFGVTLYVSGMMISAFAARALV	x
34	ppsR	minus	pending	Thiowin_00726	RC_775102..776565	487	transcriptional regulator PpsR	MFDAPESALGELGTDAAAELIAAASDIALIIDSEGRILDLAFGN DELSNQIGDWIGLNWADTVTNDSRTRVEQLLEHARAEEQPPHWEQVEHLAISGDELPV RYCAASLGDRHRIVAVGRSQQGIAALQQRLVDAQQSLERDYWRLRQLETRYRLLFRSM SEAILIVDPVNGKIVEANPAASLLLATDSRKLVGRPFPEGFDTAGTEAIKSLLAGVRS AGRGNDVRARLREPETEFLVSAAPVRQENATLLLVRLTPVETNTNSSMIGEPRSRIFK MLEKAPDGVVITRQDGRILSANNAFLELAQLSTEEQARGESLDRWLGRPGVDLNVLIA NLRQHGAVRLFATTVRSDYGSSTEVEISAVAVQNADQSSFGFIIRNVDRRVSASSGPG …	x
36	bchF	plus	pending	Thiowin_00727	777234..777719	161	2-vinyl bacteriochlorophyllide hydratase	MPRSIPPLYTPEERRRRDQSPWTLVQGILAPLQFLVFLVSLVLV LRYLATGNGELAATWSIVIKTLLLYTIMITGSIWEKVVFGKYLFARAFFWEDVFSMLV LALHTAYLAALLTGWLDTRGQMWLALAAYATYVVNATQFLLKLRAARLSSEAAVEGGA A	x
37	bchN	plus	pending	Thiowin_00728	777716..779023	435	ferredoxin:protochlorophyllide reductase (ATP-dependent), subunit N	MTDIPSASSTAGFSSSPNVLAGSSLAVRHERGERQAFCGLSGIV WLHRKMQDSFFLVVGSRTCAHMMQSAAGVMIFAEPRFGTALLQDRDLAGLADANDELD RVVRELLARRPDIGTLFLVATCPSEVIKLDLDTAAARLQQAHGGRVRILAYSGSGLDT SFTQGEDSCLRALVPHLPELPAMQRSLLVVGSLADVVEDQFQRLFDKLGIGPVHFLPP RRAADLPPVGPGTFLIAAQPFVGETMDALRERGSQLITAPFPFGIEGTRAWLLAIAAA WGISTQQVDEVIAAPAARAKTALARYREQLGGKRVSFLPDSQLEIPLGRFLARECGMQ LGELGVPYLDRRLMEPELALLPKDTQLTEGQDLEPQLERLRAERPDITVCGLGLANPL …	x
38	bchB	plus	pending	Thiowin_00729	779037..780653	538	ferredoxin:protochlorophyllide reductase (ATP-dependent), subunit B	MELTVWTYEGPPHIGAMRIAASMDAVHLVLHAPLGDSYADLLFT MIARSAARPPVSYTSFQARDLGGDTAQLVKTRLAETVARFKPQALLVGEACTAELLQD QPGALALGMGFDIPVIPLELPAFTRKESWGASETFHQLVRALLSGRPMPEGAGDPAGR AQAEGRRPRANLLGPSALGFRCRDDVAEVTKLLDSLGVDVHLVAPAGATPADLTGMLA ADFNICLYPEIAHSTCVWLERMFKQPWVRTVPIGVGATRDFLLEVARLTGLDPEPALA RARTRLPWFSRSVDSTYLTGKRVFIFGDATHVMAAVRVAREELGFDVVGFGSYSREFA RELRALGEDIGVEALITDDYLAVEARVAELHPELVLGTQMERHIAKRIGIPCAVISSP …	x
42	pucC	plus	pending	Thiowin_00730	780699..782138	479	PucC family protein	MATNKPTLDDFKQVGMQLLLRFLPFADAATDDLPLPRLLRLSLF QISVGAAIVLLNGTLNRVMVVELGMPVWLVSLMVALPLVFAPLRALIGHRSDYHHSAF GLRRVPYIWWGTLLQFGGFTFMPFALLLMSAEGNQMAVVGYIAAAIAFLMVGAGLHTT QTAGLALATDLAPKEARPRVVALLYVTLLLGMLVSAVLYGLFLRDFTQVKLIQVIQAT AAATIVLNIVALWRQEAVDRKRAANPVRAPKFSATWKAFVEDRYAARLLIAVGLGTAA FSMQDILLEPYGGEVLGLSVSQTTLLTAIWAGGTLIAFSLAGWLLTKGGNPNRMAAIG AALGLFAFAAVIAAGVLSLPWLFRGGAGLIGFGGGLFAVGTLTAAMGLAQGGHTGLAL …	x
x	x	plus	pending	Thiowin_00731	782183..783571	462	Fumarate reductase flavoprotein subunit precursor	MKAPGVLVVGGGIAGLCAAISARRAGARVLLVESAPRWRRGGNS RHARNFRFCHDRPSALVAGSYPADVFADDLARATAGGADAALSRLLIERSRAAPQWLR DAGVALQALGRGRLPVSSKTAFLLGGGQAMVNALYACAEGLGVEIRYGCAAGQARLSG NRLVGIDLRSACQATHPGQQLAETVAPDAVVLACGGAQGNAHWLRQHCGERVEGFINR GTPDARGDILIELLAAGAQAVGDPGRLYLVAVDARSPAEDGGIVTRIRGMPLGLVVDR EGRRRHDEGADQGSTRYALWGQRLADYPGQIGYLLLDAKGLNAAPAALYPPLIAPDVQ GLARQTGINADALESTWLAYNAAMRACPSLHSPPLDPPRTGPAAVLETPPFAAYPMRP …	x
x	x	plus	pending	Thiowin_00732	783555..784736	393	tricarballylate utilization protein B	MLPVPDPLPTDPRAVTEEARRMLAICNICGYCNGFCPVFDAARE RPALRAGDLAYLAHLCHACRNCLDACQYAPPHAFGVNVPRTLERLRWRNYADFAWPRA LAALFRARVGARRPGVGPTPFLLPLLPPALAMLLPMLLGLWWLPWSRLMQGALAPGDF YRILPFSVMVGLGLLTLGWALLSMGISLINFWRAISLGRPPARLTWSGLRAALWDIAS LRHLDGGGPGCTDSHTPLAPMRRWLHQLLVLGFLLCLAATLVAAVWHHGLGRAAPYAA ASLPVVLGLLGGLLMLPAGLGLWWLRRRTNPLTLAPEMQGGETSATLWLLAVVLSGLA LLAGRATPAMGLLLLAHLGAVYGFFLLLPASKFVHAGYRLLAVSRLRLEPKALARTDP T	x
x	hisA	minus	pending	Thiowin_00751	RC_805400..806170	256	1-(5-phosphoribosyl)-5-[(5-phosphoribosylamino)methylideneamino]imidazole-4-carboxamide isomerase	MLLIPAIDLKDGACVRLRQGRMDDETRFSDNPVETAGRWSAAGA RRLHLVDLNGAFAGTPVNGEAIRAIATAYPELPIQVGGGIRDLDTIGAYLNAGVQFCI IGTQAVIEPEFVARACLSFPGHILVGLDAKDGQVAIRGWAETTEHRVEDLARRFASDG IGAVIYTDIGRDGMLTGPNLEATARLAEAIEVPVIASGGITSLEDVRALAEIAAQLTK GGISGAITGRAIYEGTLDFTEGQRLADSLSASAGDSPS	x
x	x	minus	pending	Thiowin_00752	RC_806215..806763	182	hypothetical protein	MPMPRPDASASSPTGSPSGSPSGARLGILGWREWASLPELGLPL IKAKLDTGARTSALHAFDLDTESDSEGHLWARFAVHPLQDRLDLVIQCRALVLDQRLV SDSGGHREQRLVIATQLRLGRDSWPIELTLTNRDTMRFRMLIGRTALAGRALIDSGHS FALGQPQDAIGYYQSLPDETTN	x
25	pucA_2	minus	pending	Thiowin_00753	RC_806914..807084	56	light-harvesting protein, PucA	MAEIARPQNPQDDWKVWLVVNPSTWLMPMMFSLLVLGIAVHAAV FAIAPAGMLFVN	x
24	pucB_2	minus	pending	Thiowin_00754	RC_807141..807266	41	light-harvesting protein, PucB	MSGLTPDQAKEFHEQFKITYTAFCGLAAVAHILVIAGKPWF	x
25	pucA_1	minus	pending	Thiowin_00755	RC_807373..807603	76	light-harvesting protein, PucA	MQDVFNYKPNEQDYRIWLVVNPSTWLMPIMLSLLVLGIAVHAAV FSVAPEGMLFVNDAPPAVAAPAPAAAPAPAAE	x
24	pucB_1	minus	pending	Thiowin_00756	RC_807680..807823	47	light-harvesting protein, PucB	MAESKGVSGLTPDQAKEFHEQFKITYTAFVGLAAVAHILVIGAQ PWF	x
39	bchH	plus	pending	Thiowin_00757	809188..812943	1251	magnesium chelatase subunit H	MTAQTPVNVVIVTLDSHLAGATERAQALLKNEIPGLRLTLHAAA EWEQDPEALQRCRQDIAQGDIIVSTMLFMDDHIKAVLPALEARRDHCDALVGCMSAGE VTKLTRMGKFDMTAKQGGVMSLLKRLRGSSRKAEQEEGQSSGGASSNASDGAKQMAML RRIPKILRFIPGTAQDVRAYFLVLQYWLAGSDENVANLVRQLIDRYADGPRSALRGTL KVPAPTEYPEVGLYHPRLRGRISDKLAKLPAKLPKNAEIKGQVGLLVMRSYVLAGNTG HYDGVIKALEARGLRAIPAFASGLDARAAIEKFFFNKGKPSVDAVVSLTGFSLVGGPA YNDSAAAQELLARLDVPYLAAHPVEFQTLEQWQASDRGLMPVEATMMVAIPELDGSTG …	x
40	bchL	plus	pending	Thiowin_00758	812940..813941	333	ferredoxin:protochlorophyllide reductase (ATP-dependent), iron-sulfur ATP-binding protein	MSLDRLPPGLFGSGNGANADPLANAASQQSTQDSSQDSTQDSTQ HPPLDGQGSVQVQLDPSIQIGKAKVFAVYGKGGIGKSTTSSNLSVAFSKLGKRVVQIG CDPKHDSTFTLTKSLVPTVIDVLETVNFHPEELRLDDFVFEGYNGVMCVEAGGPPAGT GCGGYVVGQTVKLLKQHHLLDDTDVVIFDVLGDVVCGGFAAPLQHADRAVIVTANDFD SIFAMNRIASAILAKAKNYKVRLAGVIANRSDQTDEIDRFNAAVGLKTLAHLPNLDII RRSRLKKSTLFELDSTPELEAAKQQYMNLAQALWDGVDPLCVSPMKDRDLFDFLGFD	x
41	bchM	plus	pending	Thiowin_00759	813942..814646	234	magnesium protoporphyrin IX methyltransferase	MANPSYQQRRGQIETYFDRTAADAWKRLTSDAPLGRIRETVRQG RELMRQTLLEWMPQDLSGCRLLDAGCGTGLLSVAAARRGAEVVAVDLSATLIDLARER VPVDLNSGSVAFSVGDMLDAERGTFDYIVAMDSLIHYEPEDALALIRGFAAQARRAVI FTFAPRTPALALMHAVGQFFPRSDRSPAIVPIAEKRLQGLIEQDDGLQNWRVGRSERI IRGFYTSQGLELVAKS	x
42	lhaA	plus	pending	Thiowin_00760	814643..815180	-	lhaA/PucC family protein	-	lhaA divided in two proteins (frameshift?)
43	puhA	plus	pending	Thiowin_00762	815207..815983	258	photosynthetic reaction center, subunit H	MPSGFITQYIDVAQLTLWAFWFFFFGVVYFIRREDKREGYPVES QRMFGAIKMMEGFPPLPKPKTFVLPHNGGEVVKPSPDRPQYDFKLEPVDNFPGAAFRP VGNPMLAGVGPGSYAVRSDKPDLTHGGEPRIVPMRVAKHFSVVDKDPDPRGMTVIGAD GEVGGKVTEIWVDRSEPQVRYLELETSNKKKVLLPINMCVVKGKKQQVKVQSINGAHF NDAPTLASYDQISLAEEDKVTAYYGGGTLYATPDRAEPFL	x
44	puhB	plus	pending	Thiowin_00763	815980..816711	243	PH domain-containing protein	MSEYEVEPVPGLPGLLPEGEELLWQGTPLWVPLAKRAFYVRSVL IYFGILILLRCAFILADGDGFVVALQSALWLGFLGLVAGSILTLLAWLYARSTIYSIT SRRVVIRFGVVVPMAVNLPFKSIESAGLRVYNDGSGDIPLALVPSQKVNFLIMWPNVR PWHFSKAQPMLRALPEIESVAELLADALKAASAAEANAQSGYSSESGSEKDRQDDDSR QLESVTSSSGAEARATESLATSPSP	x
45	puhC	plus	pending	Thiowin_00764	816740..817252	170	photosynthetic complex assembly protein	MSDPFEGRGFPRPVLIGAAILISFTIAVAAFVRLTGIGKSENEF AAIAAERELHFREINPSTIEVIAEGQRIALLDSNEDGFIFGVLRGLGHHRKVSEADID RPYIVSMRVDGRLVLEDPTTGEQLDLRAYGADNASAFRELLQAGHQESTSPSVAVPAT GLPGQPDPAR	x
48	puhE	plus	pending	Thiowin_00765	817271..818059	262	photosynthetic complex assembly protein	MLSLALAILYALFLWWFSTGVILFLDRLPPRTYRFSLLGATLLG GASVVVAVWVADRADTLGAYAGFTSGVLIWGWLEMTYFMNAITGPRKVACPRDCHRRQ RFWLAIQTSLYHELAIVAVGLLLFAVTFGQANQMAAWTFAVLWWMRWSAKLNLFFGVP NLNEDWLPGHLRFLTSYLAKRPMNLLFPVSVTVATVVMTLLIEHALDFPPGSFTAQAA VLAASLLALAILEHWFLVLPVADAALWDWVFEPVDASRAGTEQE	x
x	hemN	plus	pending	Thiowin_00766	818679..820043	454	oxygen-independent coproporphyrinogen III oxidase	MTSMMPVEISPELLTRFSRFDRPGMPPPAPDAWAESFSGEDYCR TLKEVGRHPDETLALYLHIPFCPGRCLYCGCNTTVTHNSQRIDSYLDALEREVGMVGD AIGTGRDVLQLHVAGGTPNYLNDAQLTRLVELVSSRFRILPETDASIECDPRRTSAGQ LELLHALGFRRVTLGVQDLEPRVQRSIGRIQSIDLVRDVYWMAREIGFDSIGFDLIYG LPEQTAASFQSTLDAVIEMAPDRVACFGYSRGTSLAMHQHAIDIHRLPDDMERQRLFE QAVKSFLASGYVWVGLDTFVLDTDELAIAQDEGRLGHNCIGYTTMKADNTIGLGTGAA GEVHGHCVQNEPNLAIWEAMIERGEFPIARGHLLNPTDRRRREAIGYLICNLELPLEL …	x
51	bchJ	plus	pending	Thiowin_00767	820061..820717	218	bacteriochlorophyll 4-vinyl reductase	MSQSDFQPDSQLYSQLHSQPDKEQPARIGPNAIIRVGEALLALE NAEVAERIFAVAGLSRYRQTPPSEMVPEAEVIALQQALRAELPVDAAAAVSRDAGLRT GDYLLAHRIPKPAQRVLKLLPPGPACRMLLKAVAKNAWTFVGSGHYGFEMGRPVRVSI AQCPICRDATASFPVCDFYAGAFERLCQSLVSPRAQVRETQCQALGAAACQFEIDWRR	x
x	degU	plus	pending	Thiowin_00768	820812..823649	945	Protease production enhancer protein	MLPSLASLFTALLLGALLPGLWLGARHRQKSHLSSVGRSDAPLW TSSSLIDHLAESVIVLDGEGELRFASPSFQELLGIESPALLGRNLLDFVHPDEQSAVM EVLQWLKDADAEHVERLMPEPLGARPRLYSEQRLFTLAGWCWFGWSYTRLPADKGAAS SIIGVGRDIGARKRVEQELRKTESILASVGDPVSLVDTNYVYRYVNTIYERLIGKPRV AIMGHRVSDILGEKVFNNQIKHRLDRCFEGETVTFDDWFELQPGSRSFMSMTYRPYRD DAGKVIGAAVTGRDNSALRRARDQVELALEKFRVVFEHFPLGILLIDALGNIAEANPV AHRLLEHGFNSYLGPYQGPQIEDPAWAFVDANQQPLTTSYLPMVRALRERCLVADEIL …	x
x	eutE	minus	pending	Thiowin_00769	RC_823725..824759	344	ectoine utilization protein EutE	MTPAPLKISDQLIAPGSRTRVDITLPSLFTQNPVVLPVHVLHGR RPGPRLFVTAAVHGDEINGIEIIRRLLAMTALRHLHGTLLAVPVVNVYGFIRLSRYLP DRRDLNRSFPGSESGSLAARLAAIVLNEVVKDSDLGIDLHTGAAHRENLPQLRAALDD IGLLDLASAFGAPVIINSELRDGSLRAESAALGVPVLVYEGGEALRFNELAIRAGLRG ALGVMRHLGMLRRSRRAPSTQPALARSTQWARAGQSGVLGQVKRLGARVGRGEQLATI SDPFGDSDTPVNAPVSGIIIGRTNLPLVTEGEALFHIARFGQTDAAVESVEQLQSLLD PPDDLFVDAT	x
x	x	plus	pending	Thiowin_01229	1299988..1300278	96	splicing factor, CC1-like family	MNIYVGNLAYGVTQDELRDAFAAYGDVESANLITDKFTGQSKGF GFVEMPNNSEADAAIKALNETPLKGRPIRVNQAKPRAERAPRGGGGGGGQRW	x
x	x	minus	pending	Thiowin_01230	RC_1300539..1301084	181	hypothetical protein	MPTFVGLGFTLVGVWFLFQAFSSRREALERQAAEASTSQASGLT EHHHHDSPAHDNEAQNNQAHDHQVVAEALVDSQLTAEQHRHNRELQKFASGCAPVVAI GVVLMALGVSAIALMMNLTMKETMDRPGLLSIFDIVSILFFAGAFAYSLLTRTYYSTV ALTESKPNHLIANSPDNNNRP	x
12	crtB	minus	pending	Thiowin_01231	RC_1301091..1302167	358	phytoene synthase	MPLFIRDSSFADPADLLACRKLLSNGSKSFYAASFFLPKRLREP ATALYAFCRLADDAIDDNPEDHQVALAGLRERLDRAYRGQPINDPADRAFAGAIERFD IPRDLPEALLEGFEWDAEGRVYQDLSGVYAYSARVAAAVGGMMAAIMGARSPSVLARA CDLGTAMQITNICRDVGEDARNGRIYLPLEWLRDAGLEPEAWLRRPVFNEVIGDIVKR LLDTADTLYQRAEAGIAKLPTACRPGIYAARLLYAEIGQEIARNGYDSVSQRAFVSSA RKLTLLGRAMAVTPLPIKAVCTADPLEENRFLVDALAIPDPVTINATVGDKVVWVLDL FQQLEERERANAEFGRAAAAVSNG	x
11	crtI	minus	pending	Thiowin_01232	RC_1302148..1303689	513	Phytoene desaturase (lycopene-forming)	MADAASASSSAKPLAVVIGSGFGGLAAAIRLGARGYRVTVLEKL DAPGGRAYVHRIDGFSFDAGPTIITAPFLLEELWQMCGRRFADDIDLRPMDPFYRIRF DNGDTFDTNGDAEAMREQVRRFAPEDVEGYERFLEASKKIFQVGFEELGHVPFTHWTD MARIVPKMVALQSYRSVYSMVSSFVKDERLRVALSFHPLLIGGNPFSVTSIYTLISYL ERHWGVHSAMGGTGAIVDGMVKLIQGQGGSIRYNAEVAEITTVKGPGDQDKAKPRTNG VRLTDGEYVPAEVVVCNADVAWTYQHLLPSIKRRHWTDNKLKNAKYSNGLFVWYFGTK CQYPEVKHHSILLGPRYRGLLDDIFHHKVLAEDFSLYLHRPTATDPSLAPAGCDTFYA …	unique for T. wingradskyi
x	cph2	minus	pending	Thiowin_01233	RC_1304125..1306002	625	Bacteriophytochrome cph2	MTLQNHDTPEHGILKHLLSPAPFPRASDSADPSGILPSVGAGGS IASFDTDSRHQQLSLTAARVGTYQLVLSDGLVHGDAQFFRLLGLPLDTRPNTDPNQST SQSTVSLEAFQQQLNHDDRYQLQNALDAIRHNHSKAFELCFRIPSDAGKTIPVLDRGR VFREDGRLLIAGALVDLTGFVAPVQQFQHLTSHDPLTGLLSRHGIWRLVEQAHQQTHE TKRECAIALLDVDHLKDINDMHGPTLGDRVLSALAERLHERLRPKNITIGRWGGDEFL AVAADTDEAALVQEIDGARQMLAEKPLNIDGQDISVTLSAGVTSARRLMDSTEQALAR ADVALYRAKKDGYNRVYGGSTGAGTDNRTLSLAILVQDAVRTARVTPVFQPVVRLRDR …	x
x	ppdK	minus	pending	Thiowin_01234	RC_1306832..1309615	927	Pyruvate, phosphate dikinase	MSTQQKWAFAFEDGDGKNKKLLGGKGANLCEMTQIGLNVPPGFV ISTEACLAYLEDTSHALPTGVMDQVRAEMTALEQKTGKGFGNPEKPLLVSVRSGSAMS MPGMMDTILNLGLNQDTLQGEIRATGDARFGYDAYRRFVQLFGKVALGVPDEKFDHEF DEVKRAAHAKQDVDLSAADLKDISERFLKVVEEFTGRPFPSDPYEQLEIAIKAVFNSW SGKRAVDYRTQFKITPDMANGTAVNVCTMVFGNRGDDSATGVGFTRNPGTGENKLYGE YLVNAQGEDVVAGIRTPKPLDRLRVEMPQMAKELDELRDKLETHYKEVQDFEFTIERG QLYCLQTRNGKMNATALVRTSVEMEQEGLITKDQALLRIDPTALEQMLFPRLDPSFKA …	x
x	x	plus	pending	Thiowin_01235	1310153..1310815	220	hypothetical protein	MIGSGMRQLLLGVGFIGVSIRSVAAESAAMGARVVGLDGAWLLV ILTGAVALAVALMLGERPGVVHHQPASGRNSKLGGRRLLVALLALSGLALLVLADRFF VAPLAGGALLALAWGLHLSARPAGRLSATPTLWLASLVVLMAIIALVGVLLESHAWGA QADQGALMTALRWMLSLPLTVWLAALLFGAMLVEIAGMLLDGLPARRLDSPGDQNRDG RG	x
x	bla	plus	pending	Thiowin_01800	1969583..1970356	257	Beta-lactamase OXA-2 precursor	MKYLLVVASLLLSVSARAEDPSLAKVFAERDIQGTIVISSLDGK QRYIHDEARAQQRFPCASTFKILNTLIALEEKVVSGKDDRLEWDGQVHDFPDWNQDQT LESAFKVSCVWCYQDFARAIGAETYRRYLAASAFGELHEPFDETTFWLDGSLQISAVE QVRFLQKMYRRELPFSPHAYATLREIMLVEERPGYRLWAKTGWAMRADPPIGWYVGYV ETPNNVWFFATNIDIRDQEDLSLRQKLTREALYAKGVIQ	x
x	fac-dex	minus	pending	Thiowin_01801	RC_1970424..1971419	331	5-dehydro-2-deoxygluconokinase	MPAYDLYALGNALVDMEYSVTPEDLQRLDIDKGVMTLVDEAHQL RIMEHLHEHDHHRGSGGSAANSIIALSQFGGQGYYSCKVADDELGHFYLKDLVNGGIS TRDASFLDQGDTGRCVVLVTPDSDRTMCTYLGISGNLSVHELDTDALRASKWFYTEGY LVTSDTARIAAIEARKIAEQAGVKTALSLSDPNMVNFFKDGLREMIGEKLDLIFANES EAMGMADTNDLNQAVDYLKSVSREFAITRGPEGALVFDGKDIIDIDPVPVKAVDTVGA GDMFAGAFLYGLTQGWSHARAGRLASAASAKLVTSLGPRISREESQAILKQVDTA	x
07	bchO	minus	pending	Thiowin_01802	RC_1971529..1972458	309	magnesium-chelatase 30 kDa subunit	MTSTRVLNDKPDWERDAKAWPNRQCSRFLEAGGLRWHVQIAGEG PALLLIHGTAAANHSWGALLPLLAKDYCVIAPDLPGHGFTSAPDSARLSLPGMAAALN ALLLALHQSPQVAVGHSAGAAILARMCLDGLINPRLLISLNGALLPLRGLPGKVFSPV AKLLARSSLVPRIVGHDAKRQGAIERLVDSTGSHLDARGVALYRLLVSSPGHVAAALN MMANWNLEPLARDLPRLACDLRLLVGSRDQTVPPSEAAHVRALVPRATIQRLEGLGHL AHEEQAETVAQGIFRAIKDTSATNQPKSNTKNS	x
06	bchD	minus	pending	Thiowin_01803	RC_1972505..1974445	646	magnesium-chelatase 60 kDa subunit	MMPTARSESGAPAAHHPHQSAEQSAAQPASQPAPPQRPDPWQDA CMAAALFAVDPAGVVGLSVRALPGPVRDLWLEMLRDYLPPETPLRRIPLHIADGRLLG GLDLSATLRAGRPIAERGLLAEVDGGVVLLAMAERVAGSTAAHLSAVLDAGEILLERD GLTARTPTRFGVVALDEGADDEERLPNTLIDRFSLLIDLNPLAWRDVQQLPPDMELAD ILAARERLAAVTVDDDALDALCGTALALGVDSLRPTLAAVRVARVAAALAGREQPAPE DVSLAARLVLAPRATRLPMPEQPEDEMPEEPPPPEENQDDSEQDKSPEQEIDKPLEDQ VLESAEAAIPANLLAQLQLGALRARSRTSGKSGATQSGSLRGRPAGTRRGEPSATARL …	x
05	bchI	minus	pending	Thiowin_01804	RC_1974442..1975470	342	magnesium-chelatase 38 kDa subunit	MPLAFPFSAIVAQEEMKLAILIAATDQSIGGVLVFGDRGTGKST AIRALAALLPPMRVIDKCTYNCDPEANDAGLCESCRTRRSKDDIKVRKAPVPVVDLPL GATEDRVIGALDLESALTRGEKAFEPGLLARAHRGFLYIDEVNLLEDHLVDSLLDVAA SGENVVEREGLSVRHPAKFVLVGSGNPEEGELRPQLLDRFGLSVEVKTPQDLKTRVQV VRLRDEFEHDPDAFIAKWKRKDGKVRNQIVKAKERLDQVEVPDAALERAAELCMKLGT DGLRGELTLIRAARALAALEGDDAVTDDHIRRVAPPALRHRLRRNVLDDAGSTTRVER AIQELFGS	x
x	x	minus	pending	Thiowin_01805	RC_1975806..1976009	67	hypothetical protein	MQLKSVELMRNIRDRMSQETQGMSWTQENEYLKAHSGTLDVLLE KMPNKAIHPTATVAGAPSASGDG	x
x	x	minus	pending	Thiowin_01806	RC_1976754..1977170	138	hypothetical protein	MSDIETFANFIQELADREPEVFKDLVGATSDRVVKIADARGVSV SRETVHEFARMTVDLLERHDQSQYEMSDDALQHVSGGVLSLIDSAAGAIINTALHTAN TALNIVSASAPVTGPLINEFGPAIKEAKTLIVNWAT	x
x	x	plus	pending	Thiowin_03628	3883687..3884361	224	hypothetical protein	MSQFLWALLLSLYVLGILFLTRLPYRWMLARGMEPIRAVYYNRK IVHMAAGGVGSLAVPLVFTSPWLPLISGLLLTALTWATHQSGWRFYWFQTPENRNDVK FALMWALSVSALWWLLNDPWLAIVPALYMAFGDGVTGIARNALIRRRSKNLIGNVFML LVCLPIGYAAGLHAQPAMPLWGVLSALVATAVEPFEFGPIDDNVLITVASSLTLLLGL WLGPLY	x
x	gloB	minus	pending	Thiowin_03629	RC_3884399..3885187	262	Hydroxyacylglutathione hydrolase	MHIEPIPAFADNYIWVLHQPQDSRVVVVDPGDARPVLDFLAVRR LELAAILITHHHRDHIGGVAALQSAWPRAEVLAPEDPRIPGATRRLGEGERFRLPGLE FDLQVLAVPGHTSSHIAYLRVDADQPALFCGDTLFSVGCGRVFDGTPEQLAASLRRIA ALAPETLCYCAHEYTLENLGFARWVEPENPALAERATEAERLRAAQQPTVPSSLAVEL KTNPFLRVDQPGVIAAAERAAGHQLNGPTEVFAALRRWKDEDYD	x
29	dxs1	minus	pending	Thiowin_03630	RC_3885193..3887121	642	1-deoxy-D-xylulose-5-phosphate synthase	MPDASAADAALATYPLLAQIQDPADLRSMSSEQLKQLAAELRGF LIDSVSRTGGHLAAGLGVVELTIALHHVFDTPHDRLVWDVGHQAYPHKILTGRRDRMH RMRMKGGLSGFPKRSESRYDTFGVGHSSTSISAALGMSIAARVKGERRQVIAVIGDGS LGAGMAFEALNHGGPLDPDLLVILNDNEMSISPPVGAISRHLSRLLSSRVYTSVREGS KSALRGMPHLRHLVGRWEEHMKGMVMPSTMFEEMGFNYIGPIDGHDMDDLIATLNNMK AMPGPRFLHVSTQKGHGYEPAEGQPVQFHGVTPFDSKTGRMHKKAGGKTYTQIFGDWL CEAAEIEPRLLAITPAMREGSGMVAFSERFPERYFDVGIAEQHAVTLAAGMACEGMKP …	Singleton
x	pleD	plus	pending	Thiowin_03631	3887363..3888667	434	Stalked cell differentiation-controlling protein	MTYRHTQGESHSTNRSNTERALLVEDSRSLRQYLAEAIHDIADI QVASAGSLEEARRLIRDQPKEYFVGILDLNLPDAPDGEVVDLVAEAGIPIIVLTGFMD DSLRGRILTKPNVIDYVLKTNPSEIDYVARLVRRVHRNHRIKVLIVDDSKGFRLYLKE LLRTHRYQTIEAEDGEEALKLLHQHLDIRLMLTDFHMPKMDGQTLITQARRHFDRNQL GIIGFSDQSAPITSAKLLKAGANDFIAKPFLIEEFYCRITQNVETLEFIHLVRDSAVR DFLTQLHNRRYLFDVGTKAYEQAKERDSGFAAVIIDIDHFKQVNDTHGHFIGDRVLQR VATAMRKSAHQDDLLVRYGGEEFCLLIHGERASARLAEELERIRFAIASLEIPNGNEV …	x
x	barA	minus	pending	Thiowin_03632	RC_3888660..3891938	1092	Signal transduction histidine-protein kinase BarA	MGSEMSDTLVSRKEHSLYHLVFNNSLIGIFVVDCDRRIIEINER ACKLFGYEATALLGESVEVLHISPASFQRFGKEVFSRIHSTGVADVRYQLKRANGEVF QAALSGRPLNGVDRAEGVIWVIDDISRTSRAEGALRASEERFALAVAGSNAGIWDWDI PTNRIYFSPRWKELIGYADAEIPNRFEEWAARVHPEDLPGANAAIEAHLRGATDLLAT EFRMRCKDGSWRWILGRGLCVRDEQGRPLRMAGSHSDIDARRRAEDRARAQEARLAAV LDTVQTGIVVIDHDLREVVDANEQAARILGLVREELIGTLCSDHLCLNPDHCPFESGT PETWRSISNQEAVFVRADGTQVSVLKSLAPLKLQDSNLLIESFVDITPLKETEQALRL …	x
x	pyrF	minus	pending	Thiowin_03638	RC_3899083..3899808	241	Orotidine 5'-phosphate decarboxylase	MHSDLSTKTIPTDERLIMALDVPDAEAARELVRAIGPACRFYKI GLELFMAGGYFELVEWLRGEGKRVFCDLKFFDVPETVARAVRRLRERQVDFATVHGND TMLEAAAREKGETMKILAVTVLTSLDRSDLDALGFVCDVEELVLARARKALRLGCDGV ISSGLEAPRLRAELGENFLVVTPGIRPVDNRPVDDQKRTVDIEQAFRNGADYVVIGRP IRDAADPRVAAEEAQRQIAAVFG	x
x	cobD	minus	pending	Thiowin_03639	RC_3900012..3901082	356	Threonine-phosphate decarboxylase	MKLKDLGSSAVAVTSAREGAALAHGGRLLAAAARFGIPASDWLD LSTGVNPNGWPVPAVPASCWQRLPEDDDGLETAARAYYGGAALLPVAGSQAAIQVLPR LRQQLQGRSRVAVLTPGYAEHAAAWRGAGHLVSVIDALGPADAIAARIDAALADSEVL VLIHPNNPSGLRLPADQLLDWHRRLAARGGWLLVDEAFMDATPGQSLAAHGPRPGLIV LRSLGKFFGLAGARVGFVLGEPALLASLRALLGPWSVSGPARWVATRALEDRAWQAHT RAELTRSGQRLCDLLDQHGLTPTASCALFAWVCTDRAETRWRQLAAQGILTRLFDAPA SLRFGLPGGEDAWQRLAHALQA	x
52	bchE	plus	pending	Thiowin_03640	3901567..3903333	588	magnesium-protoporphyrin IX monomethyl ester anaerobic oxidative cyclase	MRILFVHPNYSAGAADIAGNWSPAWVAYIAGYLKSGGYQDYQFI DGLVDQLDDDQMRAAIRAAQPDIIATTSMTPMIYAAQRVLQIAKEEHPSAITVLGGIH GTFMYNQVLGEAPWIDAIVRGEGEAVTLNLVRCIDEGRWPTERESVRGIAFLDDNGAV VATEAEPSISDVDKIWPDWGILEWKKYIYIPLGVPVATPNMARGCPFTCSFCSQWKFW RDYRVRDPKRMVDEIEELVKVHGVGFFILADEEPQINKKMFVDFCQELIDRDLGIHWG INTRVTDVMRDEDLLPFYRKAGLVHVSLGTEAAAQLNLDRFVKETTIEQNKRAVQLLQ QNGIVTEAQFIVGLENETRETLEETYQYVMDWGADMANWSMYTPWPFSDMFAEMGDKV …	Singleton
x	x	plus	pending	Thiowin_03641	3903345..3904748	467	Ribonuclease	MRIIHHGAIDGVTGSCHELRLDDGGALLIDCGLFQGAEAGPDGA GADQLEIGFDTAPIRALVLTHIHIDHCGRLPYLLAAGYRGPILCSQPSAELLPLVLED ALEIGVTRNRKLIEQVLAVVRERTIALPYGQWHQVSDRLRLRLQAAGHILGSAYVECD LLGEGGSDDAQRVVFSGDLGAPDTPLLPGPQAPEKADVLVLESTYGDSNHQDRATRAE RLRAAIEHALGDGGTVLIPAFSIGRTQELLYELEALFHDLADSNPAWGQLQIVLDSPL AADFTRGYRRLREHWDVEAQARLGAGRHPLAFEQLVTVDNHDAHQRMVNYLAHSRQPA VVIAASGMCAGGRMVNYLKAMLGDPRHDVLFVGYQAAGTPGRDIQRYGPRGGYVILDG …	x
x	x	plus	pending	Thiowin_03642	3904909..3906126	405	Glutathione synthase/Ribosomal protein S6 modification enzyme (glutaminyl transferase)	MQDILGLAALLRRHLSGEDLGVLGQSLLDQATQNPEDAAALLDA STIIQFRGDAHLALQLQAEALKLCRTYRIPAAKPVRTRVLAIMAPGAIMGNVPLECLL EDSDIELLLYFASATTLNPSHIPEHDLLFVAIGESDANRPILNAWRPLIAGWPRPVVN APGPLDPLSRDLVYQGLRSLPGLSVPPTDRVARAALENGPPATLAFPLILRPTDSHAG QDMVKLDSPEDLTQALTQMPGDAFFVSPFIDYRSPDGRYRKYRLVFIQGRPFACHMAV SDTWMIHYLNAGMAESAEKRAEEAAFMANFNQGFATRHSQALAAIQQAVGLDYFGIDC AESADGRLLVFEVDAAMVVHAMDPFDIFPYKQPAMADIFAAFRVMLLEAAERKPPSLT …	x
x	gbuC	plus	pending	Thiowin_03937	4237426..4238379	317	Glycine betaine/carnitine transport binding protein	MIRLTKSFPRRWLTPLALLLTSILGSGAIQAAEPVRIAYVDWSS SVASANLICAVLRERLGQDCLLVETTAENMWRQVADGEADALLSAWLPDTHAEYMSRY GDELDDLGPNLEGTRTGLVVPDVNVGRQTGATGARTPRLMPAESIADLAAHRARLGGR IIGIDPEAGIMAATRRALESYGLTDFHLSSGSEQHMTQALSDAIARKGWIVVTGWQPH WMFGRWSLRFLDDPKGIYGGTGAIHTMARKGLKADNPEAHALLDNFHWTAEEMEQLLV WNTQGDQDPYLQAQRWLLNNPKQVGAWLPASTQASTQAQED	x
x	x	plus	pending	Thiowin_03938	4238385..4239080	231	hypothetical protein	MLQGLSQKFRGGCMMLLRDDGQQVAFLGTAFLVDSKGYLLTAAH LVNNPENLRVAPTDAGDGFIPMTFDRVAAMPVRVSQLDAAHGTALLKLELEENIDIGV PDDFLGTAENVRPGASIMSLGYAFGHDQLHTILTVGGFVAAKILTPNGTNLILFDNMA QDGDVGGPLVHAADGHIVGLVSGRFEPAEVARGSTEWDRKPPRDTNISYAVAIDYGIA LMEKEGLHEQVAG	x
30	idi	plus	pending	Thiowin_03939	4239227..4239799	190	isopentenyl-diphosphate delta-isomerase	MSTPRTVSFDDEPLILVDSADQVTGYQSKAQTHAGAGMLHRAFS IFLFNPQGQVLLQQRSGEKPLWPLYWSNSCCSHPRRGESYQEAIHRRLHEELSVDTEL EFIYRFEYHAPFGDIGSERELCSVYLGRLSDAQGIDLNPNEIADCRWFGLNETDALLV DEADRVTPWFIMEWRRLREDFPDRIERLIS	Singleton
x	x	plus	pending	Thiowin_03940	4239900..4240403	167	Putative lipid carrier protein	MMSLPVQTQSSEKSPTIPRLFTWPLGLVPSRLQTGALTQILNRL FAPELADGELDFLDEKVMRIRVEDVGLEYRLTLSNAKLRAARREQAEDLSIEGNTYEF LLLATRREDPDTLFFNRRLRLGGSTELGLYVKNFLDGLELEPRLGPLLKVMEGATSLL GRMGRSN	x
x	x	plus	pending	Thiowin_03941	4240643..4241728	361	putative protease	MKKALITGVTGQDGAYLAELLLEKGYQVHGIKRRSSLFNTDRID HLYQGPHETGRRFILHHGDLTDSSSLIRIMQQVQPDELYNLAAQSHVAVSFEEPEYTA NSDGLGTLRLLEAIRILGLEQKTRFYQASTSELYGQVHEVPQTETTPFHPRSPYAVAK LYAFWITVNYREAYGLFACNGILFNHESPLRGETFVTRKITRALARIKLGMQERLYLG NLDAKRDWGHARDYVEMQWLMLQQESPQDYVIATGTQYSVRQFVETAAQSIGIEIRWQ GHGVEEKGFDSNSGACIVAVDPRYFRPAEVETLLGDATKARTELGWSPRIEFKDLVEE MMREDLKEAERDALCSSEGYRVLDRHE	x
x	x	plus	pending	Thiowin_04440	4742016..4742156	46	hypothetical protein	MGELFLAEYRPAEHRVVRLPFRNGQLAPILAQQTLTIHSHHSPQ SS	x
x	x	plus	pending	Thiowin_04441	4742168..4742449	93	hypothetical protein	MQDLSKEQQILIAMRKTLAAIVRDVTPPPGMKHPLSEGTIEDVR QCFGLISAREKELADIDGRGGERPYYPDQKQPAQVISVANIGKKTSDLH	x
25	pufA_3	minus	pending	Thiowin_04442	RC_4742744..4742887	47	light-harvesting protein, PufA	MHKIWKIIDPRRAIITIFASQFLLGLLIHFILLGTDLNWLNDGI PPL	x
24	pufB_3	minus	pending	Thiowin_04443	RC_4742951..4743091	46	light-harvesting protein, PufB	MAEKSMTGLSESEAKEFHGIFMSSMTAYFGLVVVAHLLAWMYRP WL	x
25	pufA_2	minus	pending	Thiowin_04444	RC_4743272..4743505	77	light-harvesting protein, PufA	MSNDKFTGMYKIWTFFDPRRTLVAIAGFQLVLGLLIHFILLGSD LNWLDDGIPTSYMGAGAAPAGQMSAMPEARTTN	x
24	pufB_2	minus	pending	Thiowin_04445	RC_4743603..4743743	46	light-harvesting protein, PufB	MAEKSMTGLTDSEAKEFHGIFMSSMTAYFGLVVVAHLLAWMYRP WL	x
28	pufC_1	minus	pending	Thiowin_04446	RC_4743835..4745367	510	photosynthetic reaction center, cytochrome	MKLRNHQALALLSLGATAFIVGCEAPPPEVVQNGYRGLAMQQMF NPDRLEKLVEANQTPDAIPAATPGGGLAKDVYKNVQVLGDLTVNEFNRTMVALTTWVS PEEGCTYCHEGVQWESDGVYTKIASRRMLQMTREVNSTWQDHVADTGVTCYTCHRGKP VPEYVWVSDPGPDHPSMVSPTGQNTIGYAVGYTSMPFDPFTPFLLGDEEIRIIGQTVL PQGNRKSIKQAEWTYSLMGHFMDGLGVNCTYCHNSRSFTAWDQSTPQRTTAWYAIRNV RDMNNDYVAPLGEILPESRKGPLGDAFKVNCKTCHQGVYKPLFGAPMAKAYPALYETA AAEEAPVEEGVPAAAEAEAEAAPAAEAEAAPAEVAPAAEAEAAPAEVAPAAEAEAAPA …	x
27	pufM_1	minus	pending	Thiowin_04447	RC_4745364..4746338	324	photosynthetic reaction center, subunit M	MPEYQNIFTRVQVREPGYPGVELPRGSLPRLGKPIFNYWIGKIG DAQIGPLYLGGWGIASLIAGFIAIEIMGLNMLASVDWNPILFVKNFFWLALEPPPPAY GLSFPPLAEGGWWLIAGFFLTLSILLWWVRVYKRAVDLGMSTHLAWAFAAAIFFYLTL GFIRPILMGSWGEAPPFGIFPHLDWTAAISIRYGNFYYNPFHALSIAFLYGSAVLFAM HGGTILAVSRYGGDREIDQITDRGTAAERAMLFWRWCMGFNASMESIHRWAWWFAVFT VITAGLGILLTGTVVENWYLWAVKHGVAPGYPSELTIENPYLTQGVAQ	x
26	pufL_1	minus	pending	Thiowin_04448	RC_4746354..4747175	273	photosynthetic reaction center, subunit L	MAMLSFEKKYRVRGGTLVGGDLFDFWVGPFYVGFFGVSAVFFAT LGTLLIILGAALGPTWNIWQISIAPPDLDVGLGVAPLKEGGLWQFITICAIGAFVSWA LRQVEIARKLGMGLHVPFAFAFAILAYITLVVIRPVLMGAWGHGFPYGIFSHLDWVSN VGYQTLHFHYNPAHMLAISFFFTNCLALAMHGSLILSVTNPRDGEAVKTGEHENTVFR DIVGYSIGALGIHRLGVFLAINAAFWSAVCILLTGPFWTRGWPEWWMWWPNLPIW	x
25	pufA_1	minus	pending	Thiowin_04449	RC_4747299..4747502	67	light-harvesting protein, PufA	MNDSMQNLHKIWQIINPAQTLVALGVFQIVLGLGIHMILLSTDL NWLDDGIPVTYQDQAAASVPQNQ	PufAB duplication
24	pufB_1	minus	pending	Thiowin_04450	RC_4747601..4747741	46	light-harvesting protein, PufB	MAEKSMTGLTDAEAKEFHGIFMSSMTAYFGLVVFAHLLAWMYRP WL	PufAB duplication
x	x	minus	pending	Thiowin_04451	RC_4747786..4747992	68	hypothetical protein	MNVRGSTRGSWSVTKAVDVFGVAAFQASEVPVELSCTQEAHGRP GRTGAKSVRGLLTLGRMDGASLAR	no homolog
22	bchZ	minus	pending	Thiowin_04452	RC_4747989..4749464	491	chlorophyllide a reductase subunit Z	MLVLDLDRAGGYWGAVYVFTAVKGLQVIIDGPVGCENLPVTAVL HYTDALPPHELPVVVTGLGEEELGQEGTENAMKRAFATLDPKQPAVVVTGSIAEMIGG GVTPAGTKIQRFLPRTIDEDQWQSADRAIFWLWSQFGGQGKTSAKAKAAQRNKTTGPS VNIIGPAYGCFNTASDLAEVRRLVEGLGAGINMIFPLGAHLDEIPRLADADVNICLYR EYGRKLCEALDKPFLQAPIGLHSTVAFLRKLGELLGLDPEPFIEREKHTTIKPIWDLW RSVTQDFFGTASFGIVATETYSRGVRHYLEDELGMPCHFAIARRPGVKTDNAATREAV RGKTPLIVFGGYNERMYLAEAGGRAAFIPASLPGTLVRRHTGTPFMGFSGATYLVQEV …	x
21	bchY	minus	pending	Thiowin_04453	RC_4749464..4750996	510	chlorophyllide a reductase subunit Y	MPRPTNNQAPTAAGLVPDQIAAASAGGCHAGEDHLRRAAESSGQ SELLERFAADYPAGPHDRPQTMCPAFGSLRIGLRMRRTASVLCGSACCVYGLSFTSHF YGAKRSVGYVPFDSESLVTGKLFEDLREAVEQLADPEHYDAIVVVNLCVPTASGVPLR LLPQSINNVRIIGIDVPGFGVPTHAEAKDVLCGAMLKRARGEAETGPVQAPRGGRSQK PTLTLLGEMFPADPVGIGMLLEPLGLAAGPVVPTREWREFYGALDCAAVAAIHPYYAA SIREFEQAGRPIIGSAPVGHDGTDAWLSAVGEACNIPTEQVAAAKNAVLPVIKNALSQ APIKGSITVSGYEGSELLVARLLVESGAEVPYVGTATGRTRWAEADRDWLESRGVTVR …	x
20	bchX	minus	pending	Thiowin_04454	RC_4751086..4752111	341	chlorophyllide a reductase iron protein subunit X	MFSPAGHFAPDQPFEQPSGLPESGGAGSGGAGSGGNGSSGKRPE IIAIYGKGGIGKSFTLANLSYMFAQLGKKVLLIGCDPKSDTATLLFGGRSCPTIIETS SKKKLAGEPVEIGDVCFKRDGVFAMELGGPEVGRGCGGRGIIHGFELLDSLGFHDWDF DYVLLDFLGDVVCGGFGLPIARDMCQKVMLVGSNDLQSLYVANNVCSAVEYFRGLGGN VGVAGMVINKDDGTGEARRFAEKVGVPVLAEIPQDDDIRRKSAAYQIIGKLDSPWAGL FKGLAEQVAVAPPLKTTPLAHEDLLGLFASDAVGRDVILEPAKPEDMCSVQKTVKPSL EVIYDDA	x
19	bchC	minus	pending	Thiowin_04455	RC_4752104..4753078	324	2-desacetyl-2-hydroxyethyl bacteriochlorophyllide A dehydrogenase	MSIDMNTLAVVLEQPEQLAVRRLDLTPPSPADCVVDIHWSGIST GTERLLWSGRMPPFPGLAYPLVPGYESVGQILAAGEDSGRVVGEQVFVPGARCYGEVA GLFGGAASRVIAPGNRLLPLPTDLGEQGVLMALAATAHHAIAPEVAASHAPSGQTPDL IIGHGVLGRLLARLAVAMGGAPVVWERNPERVAGAEGYQVIAPESDERRDYRRICDVS GDSKLLDVLIARLAPGGEIIIAGFYEAPLAFDFPPAFMRELRLRVAAEFKEPDLIAVK SLIESGRLSFDGLITHRLPAEQAAEAYVTAFSDPSCLKMILDWRHVDV	x
18	crtF	minus	pending	Thiowin_04456	RC_4753387..4754544	385	hydroxyneurosporene methyltransferase	MKTIQAVTGATQPPWFERFTDTWHRSITRLVASPAFQRWAADFP LTRPIAQRRASDLFDLCAGFVYSQILDACVRLELFERLAKAPVTPEQLSTEVDLPPAA ADRLLRAGVALRLFKRRSGGRFGLGPHGAAMLGNPGIAAMVRHHRMLYRDLTDPLALL RGELADTELGRFWAYAGSATPGAAGDAEVASYSELMTASHAFVAGDTLDAYSFKNHQC LLDVGGGEGNFLLAAGQRWPHLRLQLFDLPAVAERAAKRLREHGLGERGATFGGDLMR DPLPQGADLISFVRVIHDHDDDAALTMLRAARAALPTSGTLLLTEPMAETPGAEPIGD AYFGFYLLAMGSGRPRPPRELTAMLKAAGFSCVRLLPTRRPMQTRVMVAKV	No CrtEF fusion protein
17	crtE	minus	pending	Thiowin_04457	RC_4754596..4755462	288	geranylgeranyl pyrophosphate synthetase	MDVMPRIEQALEQAIAQGSGEAAPPLLEAAIRHAVFPGGGRVRP RLCLAVALACGDDAPQLSDAAAAALELLHCASLVHDDLPCFDDAATRRGRPSVHAAYG ERLAVLVGDGLIVRAFELLAWSAPAHPERAAKLASIIGRAVGIASGIVAGQAWECEPE VELTEYHRQKTAALFFAATEAGAAAAGQASAPWYGFGEKLGLAYQVADDLRDVALSEA DMGKPMGQDQAHGRPSAVVELGLDGALARLQALIGAALEAIPACPGQAKLADLVRAEM RRLLPAELADRL	No CrtEF fusion protein
16	crtD	plus	pending	Thiowin_04458	4755887..4757518	543	phytoene desaturase family protein	MSAGTQPERVIVIGAGVGGLAAAVSLAAHGLEVDLFERAATPGG KLRQVAVGDARIDAGPTVFTMRWVFEELFAAAGTSLATELPLQPAETLARHAWSADER LDLFADLQRSADSIGQFAGAREARGFLRFSADARGIFRTLKESFITNSRTTPAGLMQR VGLGGLGGLMSIKPYSKLWPVLGDYFKDPRLRQLFGRYATYCGSSPFLAPATLMLVAH VEQDGVWLVEGGMHQLALTMAEVATRLGVRLHYSSPVAEILIERGRTCGVRLTSGEIH HASALVLNADTAALGAGLFGTAAARALPPTPPSARSLSALTWNLLAEPSGFPLVRHSV FFSRDYAAEFRDLFERHRLPHEPTVYICAQDRGDTDRHLDRHWDPHRDPHLDPLGHYN …	x
15	crtC	plus	pending	Thiowin_04459	4757641..4758399	252	hydroxyneurosporene dehydrogenase	MLYGARGKRWAMTERGRERLSRQPSTLRIGPSQLYWDGDDLVID IQETAAPIPLPLRGQVRVHPQAMTRHVERLDQHGRHHWWPIAPDSRVSVQLSHPRLGW SGDGYLDSNWGSEPLEQGFTDWDWSRAKRRRGGAAVLYDANRRDGSALSLALRVNPDG SVEPFEPPARAPLPTTRVWRIPRATRSEHPETGQTRARVLETLEDTPFYARSTIATRL AGEHVTAVHESLSLDRFAQPWVRMLLPFRMPRWP	x
x	x	minus	pending	Thiowin_04460	RC_4758457..4759953	498	HDOD domain protein	MTLNAWTNFLTDTELPAFARTVSDVTRIASDPEASAYMLSNAIA KDAAMAARLVKLANCPLFPSSHGNIQTVDRGVVLLGFDAVRDLAISLSVIEKVLRGQS RDALLEEMALAFHTATQSQTLARMARDDVVAEIFVAGLLYRIGVLAVLSSSDPRVSDF LAEKADFGDGDAVQIARLEKRTFGCDMTQLSRRLAQHWSLGQVLQKALSPDPGPVGDR IATGRRIAEVAMRSGWESDEIHQLLSRVARNMGLNLADMREKVHQSSETAREMASQFG ATKVAPLIPETAQAKAKRDKAEREVAGGVVAEVGNETALGEDGYSSKVLLPNPMLQLE MLGRMAELLNGKPDINRLLATVVEGVHRGIGMDRSVFALLTTKKDAVVAKFVLTQVEE …	x
x	tgpA_1	minus	pending	Thiowin_04461	RC_4760293..4762347	684	Protein-glutamine gamma-glutamyltransferase	MTGESVPDRLQIGLLSMLLALAALPLLFYMKAPVAGYIALLLLA RVAVLWRPALTPGRWPLVALALLGVGVVLAAYRELAGQDAGTALLLTMMVLKTLEIRG MRDLRVSLLLFGFLLVVAFLFNQSPLFAIYLGVLLLGSFALLADLSAVRPASITAATA NASRYGARIFADRQAWFKRLRTAGRRALVLSAQAVPLAALLFVLFPRLDSPLWSLGLE RERAKTGVSDSLELGNFSELVRSGAVAFHAYFDQPLPVEPSQLYWRGPVLWQTDGRGW EPGDDALMDELPADIEPLGERLDYAIVMEPTEQRWIFALDLPLAAPADARLTRDARLV AKERLQELKRFELRSALKYRSLALTPPERELALEVPERMITPRMRLLVGEWREQGGGA …	x
PGC proteins of Rhodobacterales without homologs in Thiorhodovibrio winogradskyi DSM 6702
No	Gene	Strand	Accession	Locus Tag	Range (original)	Size (AA)	Protein	AA	Comment
32	pucC1	x	x	x	x	x	PucC family protein	x	x
47	acsF	x	x	x	x	x	magnesium-protoporphyrin IX monomethyl ester aerobic oxidative cyclase	x	x
04	crtA	x	x	x	x	x	spheroidene monooxygenase	x
13	crtK	x	x	x	x	x	CrtK protein	x
49	hemA	x	x	x	x	x	5-aminolevulinic acid synthase	x	BioB paralog
23	pufQ	x	x	x	x	x	protein pufQ	x
35	ppaA	x	x	x	x	x	regulatory protein Ppa	x
46	PS gene	x	x	x	x	x	hypothetical protein	x
50	cycA	x	x	x	x	x	cytochrome c-551	x
60	pucB	x	x	x	x	x	light-harvesting protein B-800/850, beta chain	x	x
61	pucA	x	x	x	x	x	light-harvesting protein B-800/850, alpha chain	x	x
62	pucC3	x	x	x	x	x	light-harvesting complex assembly protein PucC3	x	x
63	pucDE	x	x	x	x	x	light-harvesting protein B-800/850, gamma chain	x	x
Marker proteins of the Calvin cycle in Thiorhodovibrio winogradskyi DSM 6702
x	x	plus	pending	Thiowin_00007	9771..9926	51	hypothetical protein	MAETHLGDPFDTFPCNKVKMRCTAAYDGTKGNDGVVIMLFGDFV NDKGYLE	x
x	ribBA	minus	pending	Thiowin_00008	RC 10196..11293	365	Riboflavin biosynthesis protein RibBA	MVIIMDDEDRENEGDILLAASCVTPEAINFMAKYGRGLICLTLS KERSERLRLPLMVDKNHAPYSTAFTVSIEAAEGVTTGISAADRARTIQAAVSPNARPT DLVQPGHVFPLIAQPGGVLVRAGHTEAGCDLARLAGFEPAAVIVEILNDDGSMARRPD LESFAKKHGLKIGTIADLIHYRVANEKAVVRLDRCQLPTKFGTFQLTTYRDTIDDGLH LALTYGNISKERPTLVRVHLQNSLCDLFAGSHPGCGWPLGDVMRQIVTQGEGVIVVLR NRDSSEDILAKMRQMMASKETEEVLSHRSDQNELRTYGIGAQILADLGVRQMRVMSAP KALHGISGFDLEVVEYVGGDDNLANSHSVQS	x
x	ribE	minus	pending	Thiowin_00009	RC 11384..12040	218	Riboflavin synthase	MFTGIIQAAGHVAQIKRFGSDARLSIQCPEFDLQLAKIGDSIAV NGVCLTVVGFLPDGFSADVSRETLSLTTLAEIRPGTLVNLESALTLATPLGGHLVSGH VDGIGTVLDIREEARSLQLSIEVPNELTRYISCKGSIAVDGISLTVNDITGSLFYLNV VPHTRVVTNIQNYRSTTRVNIEVDLIARYLERLIIGKPSKSDEYASVSKELLARHGFL	x
x	prk	minus	pending	Thiowin_00010	RC 12302..13192	296	phosphoribulokinase	MSKKHPIVAVTGSSGAGTTTVKRAFEHIFYRDGIKAAVIEGDSF HRYNRVEMKSEMAKAAEVHRNLSHFGPEANRFDSLADLFQTYGDTGKGKRRYYLHSEG EAAEHNQRLGTDLKPGEFTPWEDLEEGTDVLFYEGLHGLVVSEEDNVAQHVDLGVGVV PIVNLEWIQKIHRDNLERGYSAEAIVDTIMRRMPDYIRHITPQFSLTDINFQRVPTVD TSNPFIARDIPLPDESFVIIRFREPEKLNIDFPYLLSMIHDSFMSRRNTMVVPGGKMG FAMEVVLQPIIERMMDSRNV	x
x	x	plus	pending	Thiowin_00011	13479..13907	142	secondary thiamine-phosphate synthase enzyme	MKMVVVELRLATQQPIEIIDITEQVRKHCRDSGIRSGLATLISR HTTAYVNFNEREPQLQLDMLTFLKRLVPRDGDYRHNLAPVDGRDNAHAHLLGLFMNAS ESIPIEDGALLLGEWQSIFFVELDGPRTSRALTLQFLGEG	x
x	rbcL	plus	pending	Thiowin_00012	13911..15206	431	ribulose-bisphosphate carboxylase	MKAVDARGFFSSANALEFEDYLLLDYVFECQGDPELAAAHLCSE QSTAQWKRVNVSEDYRPRFAAKVLSLDTQACPSGFSSPVVELGDGEVYRCKVRIAHPH ANFGPRLPNLLSAVLGEGAFFAPGIPLIKLLDIQFPDSFLSAFQGPRFGIQGLRERLQ VENRPIFFGVIKPNIGLPPEPFAELGYQAWTGGLDIAKDDEMLADVQWSPLAERARLL GAARMRAEQETGVPKIYLANITDELDRLIDLHDTAVAAGAGAVMLNAWPMGLSAARML SAYTKVPMVAHFPVIAGMSRLPFFGVHTRVMTKLQRLAGFDVIIMPGFGARMMTPAAE VQACIDACLDPTFGNIKPSLPVPGGSDSAATLEAVYNLVGSADFGFVPGRGVFSHPQG …	x
x	x	minus	pending	Thiowin_00013	RC 15302..15574	60	putative Fe(2+)-trafficking protein	MSRMVKCIKLGHEAEGLERLPYPGPLGERIFEQVSKPAWGDWLK HQTMLINENRLSPMDPKARKFLEDQMEQYFFGEGAEVPEGYVPPKN	x
x	mutY	minus	pending	Thiowin_00014	RC 15633..16790	385	A/G-specific adenine glycosylase	MNQAWLPDAFADCVLQWFACHGRKDLPWQLAPTPYRVWVSEIML QQTQVAVVIPYFERFIGCFPNLGALATATEDEVLQHWSGLGYYARARNLHRSARIVLE QHGGELPEQLEWLIALPGIGRSTAGAILSLAYGQAHAILDGNVKRVLARCFAVAGWPG ESRIQKHLWALADELLSAAARAGLQELHLKHPNWPGTYNQAMMDLGATVCTRAAPDCN HCPLSRHCLALMTNSIHQYPQPKPKRPLPRRATRWLLVQDPDGRILLEQRPPSGLWGG LWTFPEVSLQESSAHWCELHLYQTAPRVEKLPDRQHSFSHFHLDIYPERLLLKSAISQ LRDSDRHLWVALKRASTMAVPAPVKAILLELLAMAKASKNQLLDCCSHRPA	x
									x
									x

## Sheet: Table S6C-Tlit06511
Table S6C: Operons of the photosynthesis gene cluster of Thiorhodovibrio litoralis 06511 (T)
Order of genes in the PGC and localization on the plus and minus strand. The color code and numbering of proteins is corresponding to those of Dinoroseobacter shibae DSM 16493 (Brinkmann et al. 2018). Protein accession numbers are highlighted in blue, corresponding locus tags are shown in black.
Operons of the "Photosynthesis Gene Cluster" (PGC) - Thiorhodovibrio litoralis 06511 (Chromosome; 5,466,623 bp [Accession pending]).
No	Gene	Strand	Accession	Locus Tag	Range	Size (AA)	Protein	AA	Comment
x	hisA	minus	pending	Thiosp_00708	RC_765195..765983	262	1-(5-phosphoribosyl)-5-[(5-phosphoribosylamino)methylideneamino]imidazole-4-carboxamide isomerase	MLLIPAIDLKDGCCVRLRQGRMEDETRFSDNPVEMAGRWLNAGA RRLHLVDLNGAFAGTPVNGEAIRAIATQYPQLPIQVGGGIRDLDTIGAYLNAGVRYCI IGTQAVIEPDFVARACKAFPGHILVGLDAKDGQVAIRGWAETTEHRVEDLAKRFASDG IGAVIYTDIGRDGMLTGPNIEATRRLAEAIDVPVIASGGITSVEDVRALAEIAAQLTK GGINGAITGRAIYEGTLDFAAGQRLADSINASSAASLAASAASR	x
x	x	minus	pending	Thiosp_00709	RC_766046..766549	167	hypothetical protein	MPDLPSSLPLSQSSSSHLKVLGWREWAGLPELGLPLIKAKLDTG ARTSALHAFDLDTETDADGRVWARFAVHPLQGRLDVAVNCRAPVLDQRQVSDSGGHRE QRFVIATRLQLGPDSWPIELTLTNRDTMRFRMLIGRTALTKRALVDSGRSYALGQPAD PIARYQR	x
25	pucA_2	minus	pending	Thiosp_00710	RC_766812..766982	56	light-harvesting protein, PucA	MAEIAKPQNPQDDWKIWMVVNPSTWLMPMFFSLLVLGIAVHAAV FAIAPAGMLFVN	x
24	pucB_2	minus	pending	Thiosp_00711	RC_767036..767161	41	light-harvesting protein, PucB	MSGLTPDQAKEFHEQFKVTYTAFVGLAAVAHILVIGGKPWF	x
25	pucA_1	minus	pending	Thiosp_00712	RC_767281..767529	82	light-harvesting protein, PucA	MFQDVLNYKPAEQDYRIWLVVNPSTWLMPMMLSLLVLGIAVHAA VFSIAPAGMLFVNDEAPVAAAPAAAAPAPAAEAAPAAQ	x
24	pucB_1	minus	pending	Thiosp_00713	RC_767686..767829	47	light-harvesting protein, PucB	MAESKSVSGLTPDQAKEFHEQFKVTYTAFVGLAAVAHILVIGGQ PWF	x
39	bchH	plus	pending	Thiosp_00714	768741..772559	1272	magnesium chelatase subunit H	MATKTSASGSKAAGRSASAKTPINVVIVTLDSHLAGAAERAQAL LKDEIPGLRLTLHAAAEWDDDPAALERCHQDIAKGDIVLSTMLFMDDHIKAVLPALEA RRDQCDAMVGCMSSGEVTKLTRMGKFDMSAKQGGAMALLKRLRGSQRKVEQDDDQSSS KASSNSSDGARQMAMLRRIPKILRFVPGTAQDVRIYFLTLQYWLAGSDENVANMVRQL VDRYAAGPREALRGALKVSAPAEYPEVGLYHPRMRGRISDKLSKLPAKLPKSAEIKGQ VGLLVMRSYVLAGNTGHYDGVIKALEARGLRVMPAFASGLDARAAIEKFFFARSGKGV KPTVDAVVSLTGFSLVGGPAYNDSAAAQELLAKLDVPYLAAHPVEFQTLEQWQASDRG …	x
40	bchL	plus	pending	Thiosp_00715	772556..773500	314	ferredoxin:protochlorophyllide reductase (ATP-dependent), iron-sulfur ATP-binding protein	MSLDRLPPGMFGSGLGSGDPKSSGSQPPPDGQGSVQVQLDPDIK IGKAKVFAVYGKGGIGKSTTSSNLSVAFSKLGKRVVQIGCDPKHDSTFTLTKSLVPTV IDVLETVNFHPEELRLDDFVFEGYNGVMCVEAGGPPAGTGCGGYVVGQTVKLLKQHHL FDDTDVVVFDVLGDVVCGGFAAPLQHADRAVIVTANDFDSIFAMNRIASAILAKAKNY KVRLAGVIANRSDETNEIDRFNEAVGLKTLAHLRNLDIIRRSRLKKSTLFELDSTPEL EQAKEQYMVLAQALWDGLDPLTVSPMKDRDLFDFLGFD	x
41	bchM	plus	pending	Thiosp_00716	773501..774211	236	magnesium protoporphyrin IX methyltransferase	MTNPSYQQRRGQIETYFDRTAAEAWKRLTSDGPLGRIRETVRQG RELMRQTLLDWMPQDLSGCRLLDAGCGTGLLSIAAARRGADVVAVDLSATLVDLARER VPPDLGDASNGSVDFSVGDMLDASRGEFDYIVAMDSLIHYEPEDALALIRGFAAQARR GVIFTFAPRTPALALMHAVGQFFPRGDRSPAIVPIPEKRLHALIAADDALKGWRIGRS ERIIRGFYTSQGLELIPA	x
42	lhaA	plus	pending	Thiosp_00717	774208..775641	477	lhaA/PucC family protein	MMLAYRQLAQRWLRIAPKYLPFADVATRELPLSRLLRLSLFQVS VGMAVVLLNGTLNRVMVVELGVSTWLVALMVSLPLVFAPLRALIGFRSDHHRSALGWR RVPYIWFGTLLQFGGFAIMPFALLLLSGMGTGEAPPYAGELGAAIAFLLVGAGLHTTQ TAGLALATDLAPEEARPRVVALLYVTLLVGMFGSALIFGALLADFSSKQLIQVIQGAA AATMVLNLIALWKQEARDPSRNRGATRPSFKTAWAEFIRGGRASRLLVAVGLGTAGFG MQDILLEPYGGQILHLSVSATTVLTAILAAGTLFAFGLAARLLGRGYDPYRLSGYGAV VGIMAFVTVILSAPLGSVLIFRAGTALIGFGGGLFAVGTLTAAMSMSRNGQSGLALGA …	x
43	puhA	plus	pending	Thiosp_00718	775668..776444	258	photosynthetic reaction center, subunit H	MPSGYITQYMDVAQLTLWAFWFFFFGVVYFIRREDKREGYPVES QRMFGKIKMMEGFPPLPAPKTFTLPHNGGEVVKPSPDRPQYDYKLEPVEDFPGAAFQP VGNPMTAGVGPGSYAVRANKPDLTHAGEARIVPLRVAKHFHVVERDPDPRGMTVIGAD GAVGGKVTEIWVDRAEPQVRYLELETNNKKKVLLPINMCRVKGKQQEVKVRSINGAHF NDAPTLASYDQITLAEEDKVTAYYGGGTLYATPDRAEPFL	x
44	puhB	plus	pending	Thiosp_00719	776441..777172	243	PH domain-containing protein	MSEYEVEPIPGLPGLLPEGEELLWQGTPQWVPLAKRAFHVRGVL FYFGLLVLLRVGFILTEGEGWGLALQSALWLAFLAFAAVGILSLLAWLYARSTIYSIT SRRVVIRSGVVVPMAVNLPFKSIESAGLRVYSDGAGDIPLALIPEQKVNYLIVWPNVR PWTFSKAQPMLRALPDVEKTAELLAHALKAATEAESAEVAQDQSSQPSGSATTQSREA IRESTESSDAGASSAGEPLPTTPSS	x
45	puhC	plus	pending	Thiosp_00720	777200..777709	169	photosynthetic complex assembly protein	MSDPFEGQQFPRPVLIGAAILISFTIAVAAFVRLTGIGKDENEF APAVVERKLYFHEIDPNTIEVIADGGRIATLDANDDGFIFGVLRGLGHNRKVNEADMG QPYVVSQRADGRILLEDPMTGDQLDLRAYGVDNAAAFADLLRAEQQGAPTAAASPADG LPGQPRAAH	x
48	puhE	plus	pending	Thiosp_00721	777728..778573	281	photosynthetic complex assembly protein	MLSLALAILYALFLWWVSTGIILFLNRLAPSTYRWSLLGGTVLG GVSVAGAIWSSDRADILGAYLGFTSGVLIWGWLEMTYFMNAITGPSKAHCPRNVHGRR RFWLAIQTSLYHELAVVAVGLLLFALCWGHVNQTAAWTFAVLWWMRWSAKLNLFFGVP NLNEDWLPSHLRFLTSYLAKRPMNLLFPMSVTVATVVMALLVEHALDFPPGSFTAQAA VLAASLLALAILEHWFLVLPVADAALWDWAFEPSPTEAPADVSAEAPDGSSGKKRPDS SVSSR	x
x	x	plus	pending	Thiosp_00722	778799..779104	101	hypothetical protein	MRILPVHVTNHLATKRRHAEFLSCARKPVVTRVWALMPRFSLPC FLFHSSRFFTRPILALFARTGLERRHGRCALPDRGTWPEVLCFACTKLPLNRSEVAV	not present in T. winogradskyi
x	hemN	plus	pending	Thiosp_00723	779104..780468	454	oxygen-independent coproporphyrinogen III oxidase	MTSMMPIDISPELLTRFSRFDRPGMPAPAADAWADGFTGEDYRR ALGEIGRHPDETLALYLHIPFCPGRCLYCGCNTTVTHNSQRIDGYLDALEREVEMVAD AMAAGREVLQLHVAGGTPNYLNDAQLTRLVELVDSRFRILPETDASIECDPRRTSAGQ LELLHALGFRRVTFGVQDLEPRVQRSIGRIQSIDLVRDVYWMAREIGFDSIGFDLIYG LPEQTAESFQATLDAVIEMAPDRVSCFGYSRGTSLAIHQHAIDVHRLPDDMDRQRLFE QAVKTFLAAGYVWVGLDTFVLDTDDLAIAQDEGRLSRNCIGYTSMRADNTIGLGTGAA GEVHGHCVQNEPNLPTWEAMIERSELPIARGHLLNPADLRRREAIGHLICNLELPLEL …	x
51	bchJ	plus	pending	Thiosp_00724	780429..781307	292	bacteriochlorophyll 4-vinyl reductase	MGPRALAFCENPLSHTGHNAGRNTEPNPQPIPGPNPGLDHRHNE VEHEQGQEADAAEVARIGPNAIIRVGEALTALEENTLAGLGLNPRESSSKLSGAGSDR SEGSALASCGTTPGFELTGIGAKIFADAGLEHYLNHPPSEMVPESEVIALQQALRAAL PQEIASAVSRDAGRRTGDYLLAHRIPKPAQRLLKLLPPGPACRMLLKAVANNAWTFVG SGQYAFTMGRPVRVSIAQCPICRGATATVPVCDFYAGSFERLCQILVSPRARVHETQC QALGAAACEFQIDWGR	x
x	liaR	plus	pending	Thiosp_00725	781350..783440	696	Transcriptional regulatory protein LiaR	MLSILASLLTGLVLGCALGAYLLRRQWRERRLATLATEAPQTQL QPEPQSEPVDRNLRQLESILATVADSVSLVDTNFVYLYVNMTYERFIGKPRAAIMGAT VADTLGDDVFRQHVKPRLERCFDGETVSYDAWFELQPGAHFFMSMTYRPYRDKTGRVV GAAVTGRDISALKRARDQVELALEKQRVLEAMRESERRFRIMADGVPLILWVANQHGE LEFANAVFRRFFALASDSSAPLRDLWPRVFHREDLEVFQGRLKESVADFSGFETECRV RRGDGEWRWMQVSVAPHRGSTGKVLGFVGAMQDISERRRAEAEVRKSGEQLRERAERL ARLTLQLTLSEQQERLRISRLLHDHLQQDMVAVKFQLAKLDANPALAGQDGLAQAKAL …	x
x	x	minus	pending	Thiosp_00726	RC_783525..784559	344	aspartoacylase	MIQKPLQIAEQHIAPGRRTRVDIPLPSLFTQNRVILPVHVVHGR LPGPRLFITAAIHGDEINGLEIIRRLLATSVLRNMRGTLLAVPVVNAYGFVRLSRYLP DRRDLNRSFPGSESGSLAARLATTLMQEVVRDSDLGIDLHTGAAHRENLPQIRAALDD FGMLELASAFGTPVLINAEVRDGSLRGESAALGVPVMVYEGGEALRFNEFAIRAGLRG ILAVMRYLGMVRGGRRSATHSPAVARSTLWARAGQSGVLRQVKTLGSRVTKGAHLATI ADPFGDTDTPVPAPSGGIIIGRTNLPLVTEGEALFHIARFEQTAAAAESVERFQNLLE PPDDLFVDSV	x
x	x	plus	pending	Thiosp_01348	1510069..1511064	331	putative AAA-ATPase	MGNGMFLTGVSKFSKVSLFSGLNNLKDITVDSRYSALCGYTEKD MDEVFCPELEGLDREQIRAWYNGYNWTGDAVYNPFDVLLLFDSRLFRPWWFETATPSF LIDVLTARQTFAPKLGRLIANDRLLSAFDVDYIATEALLFQTGYLTIDSMRERGASTE YRLRYPNLEVRASLNGALLDALSARSSAVAEQSSRLYDLLLANDFSGLEQLFTAFFAS IPHDWYRNNPISQYEGYYASVFYAYFASLGLDLTPEESSNAGRLDLAVKFNDQIYLIE FKVIEHSGEGAAMAQVKAKGYADKYRSQGQLTHLIGVEFSAEQRAVVDFEVETLD	x
x	x	minus	pending	Thiosp_01349	RC_1511159..1512694	511	Ribonuclease	MHIKHHGAVDGVTGSCHELELADGSSLLIDCGLFQGAEAGADGA GAAHLEIGFDITPVRALVLTHVHIDHCGRLPYLLAAGYRGPILCSPASSELLPLVLED ALEIGVTRNRKLIEQVLAVVKERTIALPYGQWNQVTDKLRIRLQPAGHILGSAYVECD VHDSDKGMRSAMDASANRGTSGQTDQSATGSGNQRGDSRTDKERGQSDSGSGDKSGRR VVFSGDLGAPDTPLLPGPQPPERADVLVLESTYGDHNHQDRSARAERLRAAIEHALAD GGTVLIPAFSIGRTQELLYELEELFHQLGETAATWRDLQIVLDSPLAADFTRGYQRLR KHWDAEAKSRLSHGRHPLAFEQLITVDSHDAHQRMVNYLAHSRQPAVVIAASGMCAGG …	x
52	bchE	minus	pending	Thiosp_01350	RC_1512751..1514517	588	magnesium-protoporphyrin IX monomethyl ester anaerobic oxidative cyclase	MRILFIHPNYSAGAADIAGNWSPAWVAYIAGYLKSGGYQDYQFI DGLVDKLDDEQMRQAIRAAQPDIIATTAMTPMIYAAQRVLQIAKEEHPNAITVLGGIH GTFMYNQVLDEAPWIDVIVRGEGEAVTLNLVRCIDEGRWPAERASVRGIAFLDENGKV IAPEAEPSISDVDAIWPDWGILEWKKYIYIPLGVPVATPNMARGCPFTCSFCSQWKFW RDYRVRNPKRMVDEIEELVKVHGVGFFILADEEPQINKKMFVDFCQELIDRDLGIHWG INTRVTDVMRDEDLLPFYRKAGLVHVSLGTEAAAQLNLDRFVKETTIEQNKRAVRLLQ ENGIVTEAQFIVGLENETRETLEETYNMVMDWGADMANWSMYTPWPFSDMFTEMGDKV …	Singleton
x	cobD	plus	pending	Thiosp_01351	1514714..1515763	349	Threonine-phosphate decarboxylase	MTQGLVDSCQGGEGDALAHGGRLQEAAARFGIARADWLDLSTGI NPSGWPVPPVPASSWQRLPEDNDGLETAARDYYGCNALLPVAGSQAAIQALPWLRGPS RVALLAPAYAEHAAAWRAGGHQVTSADALCGPQALAPRVDELVDGSDVLILVQPNNPT GLRFSHEQLLDWHRRLAERGGWLIVDEAFMDVTPEQSLAACCPQPGLMVLRSLGKFFG LAGARVGFVLGEPDLLAQLRRRLGPWTLTGPARWVATQALCDQDWQLQTRAALAAAGQ RLSDLLSRHGLPPAGGCALFAWVRDDRAEAIWGQLAGQGILTRLFREPPSLRFGLPGD EQAWQRLERALRGLG	x
x	pyrF	plus	pending	Thiosp_01352	1515813..1516538	241	Orotidine 5'-phosphate decarboxylase	MTQDSLSTKAIPVDERLIVALDLPDADAAKHLVRGIGPACRFYK VGLELFMAGGYFDLVEWLRAQDKRVFCDLKFFDVPETVGRAVRRLRDREVDFATVHGN DTMLEAAAREKGDVKILAVTVLTSLDRSDLDSLGFACDVEELVLSRARKALRLGCDGV ISSGLEAPRLRADLGENFLVVTPGIRPVDNRPVDDQKRTVDIEQAFRNGADYVVIGRP IRDAADPRVAAEQAQRQIAGVFG	x
x	barA	plus	pending	Thiosp_01361	1526389..1530249	1286	Signal transduction histidine-protein kinase BarA	MGSNKDKQPKDKNDKVTGATPSGPLIKPPPLEGSALPPELMLAA HLPVGVAVYWPLDDGADFEILYLNPVGARMLERAAEDLTGQRLSEAFPGAQAIGVLGA LQEAHRSGCPQNLDSELYRDEGVELWVNNRLLRLETGTHRGALVAVFSDESDLVQLRR DSLEQRNRFRLVFENSLIGIFVVDNDRRIIEINDCACGIFGYDAQSLLGESVEILHLS PASFQRFGEEVFSKIESTGLVDVRYDLKRGSGEAFLAALSGRPLNGVDREAGVIWVVA DISAMSRAEEALRASEERFALAASGANEGIWDWDIKTNRAYLSPRWKELIGYRDDEIP NRFEEWSSRVHPDDLSAANAAIEAHLRGETEMLETEFRMRCKDGSWRWILGRGLCVRD …	x
x	pleD	minus	pending	Thiosp_01362	RC_1530273..1531541	422	Stalked cell differentiation-controlling protein	MISESSEQVLLVEDSRSLRQYLAEAIEDRADVRVAGAGSLSEAQ ALIEQGTQQFFVGILDLNLPDAPNGEIVDLVVETGLPIIVLTGYMDDGLRERILAKPN VIDYVVKTNASEIDYVANLVRRIHRNNKIKVLIVDDSRSFRVYLRELLRTHRYQTLEA ADGEEALAMLQQHHDIRLMLTDFHMPKMDGQTLIAQARRHFDRNQIGIIGISDQSAPI TSAKLLKAGANDFIAKPFLIEEFYCRITQNVETLEFIRFMRDSAVRDFLTQLFNRRYL FDVGAKAYDHAKEKDLGFATVVIDIDHFKQINDIHGHFVGDRVLQRVASQLQKTIHSD DLLVRYGGEEFCWLIKGERASAQLDQELERIRHGIEALEVPNGDAVLRVTASLGATLN …	x
29	dxs1	plus	pending	Thiosp_01363	1531906..1533870	654	1-deoxy-D-xylulose-5-phosphate synthase	MPDAHAPDPMPDPTPDPTMSRFPLLSQIEDPADLRALSGDELKE LAAELRAFLIESVSRTGGHLAAGLGVVELTIALHHVFDTPHDRVVWDVGHQAYPHKIL TGRRDRMHRMRMKGGLSGFPKRSESRYDTFGVGHSSTSISAALGMSIAARLKGERRQV IAIIGDGSLGAGMAFEALNHGGPLDPDLLVILNDNEMSISPPVGAISSHLARLLSSRV YTSMREGSKSALRGLPHLRELVGRWEEHVKGMVMPSTMFEELGFNYIGPINGHDMDDL VSTLHNMKSMPGPRFLHVATQKGHGYEPALGQPVQFHGVTPFDSKTGRMHKKSGGKTY TQIFGDWLCEAAEKEPRLLAITPAMREGSGMVAFSERFPERYFDVGIAEQHAVTLAAG …	Singleton
x	gloB	plus	pending	Thiosp_01364	1534073..1534900	275	Hydroxyacylglutathione hydrolase	MTQLQIVPISAFADNYIWLLRRPSSARVAVVDPGDAQPVLEYVQ RHQLELAAILLTHHHQDHIGGLPALQAAWPEVEVLAPEDRRIPEATRRLGDGDRLRVA GIDVEAEVLSVPGHTATHIAYLLPACLPSAKQSPDDQGQALFCGDTLFSVGCGRVFDG TAEQLAASLRRISALPAETRCYCAHEYALENIGFAQWVEPESPALAERTAEVERLRAD GVPSVPSTLAMELATNPFLRVDQPAVIAAAERAAGRVLAGPTEVFAALRRWKDEDYD	x
x	Lnt	plus	pending	Thiosp_01365	1534884..1536503	539	Apolipoprotein N-acyltransferase	MKTTTDAAGRRDPLPDQFAPGGRIPGWLIPTLRVPASLVRRGCW LLAPAAGAVTVLSFAPFGWYPLGMLALALWYHCLQGRSGRSAFLLGWLYGFGLLGVGV AWIRISLNEFGNLPAVVANAMMLLFVAAMALYYGLAGWLIGRWQSGLRRAGQDWAGAA LLLPAVWVLSEWLRSWLLTGFPWLLLGNTQVDSPLSGWAPVLGVHGLSLLAALSAGLL WLGLARRRARVGAVVVLVLVWGGGTLLRFIHWTQPAGEPFSVALVQANITPSLKWQPE ALEPNLEAHLRLTREQLGRGLIVWPETAIPSFLHEVRQSLIDPLAERAREEGSEIVIG VPIMESDRSYYNGLLSIGTASDTYYKRHLVPFGEYLPLGALIEPVVDWFDVPMSSFSP …	x
x	prfC	plus	pending	Thiosp_01782	1984393..1985988	531	NADH-quinone oxidoreductase subunit N	MSQSSISQLAEQITRRRTFAIISHPDAGKTTLTEKLLLFGGAIQ MAGTVKGRKAARHATSDWMELEKQRGISVTSSVMQFPHGEAIVNLLDTPGHEDFSEDT YRTLTAVDAALMVIDVAKGVEDRTIKLMDVCRLRNTPILTFVNKLDREGRDAIDILDE IESVLKIQCAPVTWPIGMGKRFKGVYDLRHDRTHLFSATHGGRIQEGETIEGLNNPRL DEIVGDQAQELRDELELVQGASHEFDHADYLAGIQTPVFFGSAINNFGVKELLDAFVD YAPAPLPRQTRSREVEPAESNFSGFVFKIQANMDPAHRDRVAFLRVCSGSYKKGMKMR HVRIGKTVQVANAITFQADERRHVEEAWPGDIIGLHNHGTIQIGDTFTEGEDLKYEGI …	x
x	IolC	minus	pending	Thiosp_01783	RC_1986018..1987013	331	5-dehydro-2-deoxygluconokinase	MPQYDVYALGNALVDMEYSVEPEDLKRLEIDKGVMTLVDEAHQL RIMDHLRERDHHRGSGGSAANSIIALGQLGGSGYYSCKVADDELGHFYLKDLSTGGIA TRDTKFLDAGDTGRCVVLVTPDSDRTMCTYLGISGNLSVHELDTDALRASKWFYTEGY LVTSDTARVAAIEARKIAEDAGVKTALSLSDPNMVNFFKDGLKEMIGDKLDLVFANED EAMGMADTSDLTQAIDYLKTISREFAITRGPKGALVFDGKELIDIDPVPVKAVDTVGA GDMFAGAFLYGLTQGWSHARAGRLASAASAKLVTSLGPRISAEESQAILKQGEAA	x
07	bchO	minus	pending	Thiosp_01784	RC_1987227..1988183	318	magnesium-chelatase 30 kDa subunit	MPEPHYWLNCCWQAGLDTMTSARVMNDKPDWERDASDWPNREHS RFVEAGGLRWHVQMMGDGPALLLLHGTAAATHSWGSLMPLLAERFRVIAPDLPGHGFT SAPEPKCLSLPGMAAAIGALLLSLGQSPVVAVGHSAGAAILARMSLDGLIAPRLLVSL NGALLPLRGMPGKVFSPVAKLLARTSLVPRIVGHDAKRPGAVERLVDSTGSRLDKAGV ARYRLLVSSPGHVAAALNMMANWDLNPLARDLPRLPCELLLLVGDNDQTVPPSEAKRV QRLQPNARIEHLQGLGHLAHEEQAAPVARVILGAADEALATG	x
06	bchD	minus	pending	Thiosp_01785	RC_1988230..1990122	630	magnesium-chelatase 60 kDa subunit	MMPGAGTATSAQSAPQQSPPPAPQPDSRPDLWQDACQAAALFAV DPAGVVGLSVRALPGPVRDLWLQFLSEFLPPDTPMRRVPLHIADGRLLGGLDLAATLR AGRPVAERGLLAEVDGGVVVLAMAERIARSTAAHLSAVIDAGEILLERDGLTARTPSR FGVVALDEGADDDERLPNTLVDRFSMLIDLTPLSWREVQTLPPDVEAADILAARKRLP GVSVDDDALDALCGTALALGVDSLRPTLAAVRVARVAAALAGREQVAPEDISLAARLV LAPRATRLPMPEQPEDEMPEEPPPPEENQDDSEQDKSPEQEIDKPLEDQVLESAEAAI PANLLAQLQLGALRARTRTSGKSGASQSGSLRGRPAGTRRGEPGAGARLNVIETLRSA …	x
05	bchI	minus	pending	Thiosp_01786	RC_1990119..1991147	342	magnesium-chelatase 38 kDa subunit	MPVAFPFSAIVAQEEMKLAILIAATDQSIGGVLVFGDRGTGKST AIRALAALLPQMQVIDKCTYNCDPQANDAGLCESCRTRRKKDDIKVRKAAVPVVDLPL GATEDRVIGALDLESALTRGEKAFEPGLLARAHRGFLYIDEVNLLEDHLVDSLLDVAA SGENVVEREGLSVRHPAKFVLVGSGNPEEGELRPQLLDRFGLSVEVKTPQDLKTRVQV VRLRDEFEKDPDAFVAKWKRKDGKVRNQIVKAKERLEKVEVPDAALERAAELCMKLGT DGLRGELTLIRAARALAALEGDDAVGDDHIRRVAPPALRHRLRRNVLDDAGSTTRVER AIEELFGA	x
x	menH	minus	pending	Thiosp_01787	RC_1991359..1992159	266	2-succinyl-6-hydroxy-2,4-cyclohexadiene-1-carboxylate synthase	MITGYHAEQFATNTPKPARTPPSWLLLHGFTGSASDWAGIWPAA HPALAIDLPGHGQSPDPEKEFSKEIQRLLRALPETVHSLAGYSLGGRIALALMAAAPE RFQRLVIISAHPGLETTSERAARRRQDQQWIDCLRDQGIARFATAWQHQALFHAQAAR APAAVTAQHRQRLAQRPEGLARNLACFGLGQMPPTWTAIEAFNGELHWITGEEDAKFT AIGKGVKHRRPATRHDIIDDCGHNPLIEAPRKLRELLAPSPLTPAGGG	x
x	ykfB	minus	pending	Thiosp_01788	RC_1992156..1993307	383	L-Ala-D/L-Glu epimerase	MRLQALPYRLPLRQPWHSARGTLSERCGWLLVAEHDGLTGYGDC APLPAAGTEELDAADRRLTHWQARASACTPQAMLDALDAALPSATPAADAAVECALLD VLSKAAAVPLRAYLLRGCAPALAELATSASTPERIPVNGALGALMNCLPQTIAAQCAA GFRVLKLKVGTGHWSDEIEQLGALLAALPEGAQLRLDANGAWDFATASRILQALEALN AKCKRGPPPIESLEEPLRDPQDNQLAQLQARTSIALALDESLPRRAWPLKLDHLPVRR LVLKPQVLGGLRPSLKLAAAALEAGKETLVTSLIESAAGLWASAQLAAALAHLAEGSQ AARIHHGLATADWLAKDLGEPPPIRDGMLHLGEGPGSGFQSWATAGDRE	x
x	x	plus	pending	Thiosp_01827	2042781..2043020	79	hypothetical protein	MTEYHDQVRKVAAKLKEIEGDLKSPNYLHTDLYNYTDGTLNLRI DARMDHDDILRLTKVLCYLRKVMIDQPPTTSITRL	x
x	x	minus	pending	Thiosp_01828	RC_2043087..2043557	156	hypothetical protein	MPSILGLVFTAFGIWYLFAAFRRRNEVLRQRTERQAAREVSDHG GSQQKLDPTTPADDAPRPNPSMQRFASGCAPVVALAVVMGALGVAAIALVMDGPRRIS IFDILSLLFFAGAFAYSLMMQTFYSSAFTSAEDNPDTSSAQDSEPESGDKGGES	x
12	crtB	minus	pending	Thiosp_01829	RC_2043564..2044637	357	phytoene synthase	MPLFINDSSFADPADLLACRKLLSNGSKSFYAASFFLPKRLREP ATALYAFCRLADDAIDDNPEDHQVALAGLRDRLDRAYRGEPINDPADRAFAGAIERFD IPRELPEALLEGFEWDAEGRVYQDLSGVYAYSSRVAAAVGAMMAAIMGVRSPSVLARA CDLGTAMQISNICRDVGEDARNGRIYLPLDWLREAGLDPDAWLQRPVFNEVIRDVVKR MLDTADELYQRAEAGIAKLPTSCRPGIYAARLLYAEIGQEIARNGYDSVSQRAVVSPA RKMTLLGRAMAVTPLPIKAVCTAEPLEENRFLVDALAIEDPELTDGTVSGKVLWVLDL FHQLEERERAQAGGLNQAAAVSS	x
11	crtI	minus	pending	Thiosp_01830	RC_2044618..2046186	522	phytoene dehydrogenase	MSNPAPSPTTSSSGTLSGAQAKPLAVVIGSGFGGLAAAIRLGAR GYRVTVLEKLDAPGGRAYVHHIDGYSFDAGPTIITAPFLLEELWNLCGRRFQDDIDLR PMDPFYRIRFDDGDIFDTNGDAEAMRDQVRRLAPGDVAGYDRFIKTSKNIFRVGFEEL GHVPFTHWTDMARIVPKMVALQSYRSVYSMVSSFVKDERLRVALSFHPLLIGGNPFSV TSIYALISYLERHWGVHSAIGGTGAIVQGLVKLIEGQGGSIRYNAEAAEITTAKSAGN NKGKPRANGVRLTNGETVPAEIVVCNAEVAWTYQHLLPSVKRQRWTDAKLKKAQYSNG LFVWYFGTKRQYPDVKHHTILLGPRYRGLLDDIFHRKVLADDFSLYLHRPTATDPSVA …	x
x	mtaD	minus	pending	Thiosp_01831	RC_2046297..2047619	440	5-methylthioadenosine/S-adenosylhomocysteine deaminase	MDVELLIHADWILPVDAEDSTLAQHSIAIERGRIAALLPRAEAQ AQIQAQTNLTLAGHALIPGLINAHTHSPMTLLRGLADDLPLMTWLHEHIWPAEGRWVD PDFVADGTRLALLEMLRGGITCFNDMYFYPEVTARVAAEAGMRALIGMIVVDFPTRYA ENPEQYVSRGLSLHERYRDHHLIRTAFSPHSPYAVSEEPLQRVATLAEELQVPVHIHL HETRDEVTQSLRDHGERPLARLDRLGLLSPLLVAIHMTQLDDSEIDRLAQSGAHVVHC PESNLKLASGFCPVAKLLKTGVNVALGTDGAASNNDLNMLGEMRTAALLAKGVASSAS ALPAATALRMATLNGARALGMDEETGSLEVGKAADLVALDLRDPHTQPLYNACSQIVY …	x
x	mtnA	plus	pending	Thiosp_01832	2047797..2048864	355	Methylthioribose-1-phosphate isomerase	METTNALVAHPDHAVLWQDERLYLLDQRLLPERTAFITCESVQQ TAAAITDMVVRGAPAIGVAAAYGVVLAARARVADAGNHWHERIEADLQQLAAARPTAI NLFWAIERMRAFMATLDHLDPVPALLAEAKRIHAEDIAANQRIGELGVALIKAPTAVV THCNAGALATGGYGTALGVVRSAHAAGKITRVYADETRPWMQGSRLTAWELMESGIPV TLQADGAAASLMAGGEIGWVIVGSDRIAANGDVCNKIGTFGLAILARHFGVKFMVAAP TSTIDLSVASGAEIPIEERASDEVLSCGGKRLAPEGAVARNPVFDVTPAALVDAIVTE RGVVEKPDAQKIGALMERDRD	x
x	x	plus	pending	Thiosp_03565	3894777..3896147	456	Transposase for transposon Tn5	MIALASELQDISLGDKRLNHRAQQVLETLGAKPTQSIPGACNGW YETRAAYRFFDHPTVTAEQILAPHFACTEERLREHPRVLCIQDTSELDYTTKKGIVGL GPLNFESRYGMYIHPTLAVTPERLALGLLDLHTFVREPGSLGQDKDSRRPLEEKESVR WVDGYARVNALAEELSDTRLTYVADREGDIYDLFVEAPIPENSADWLVRVQHRDRCLA DGRKLNEALDAAPVLTEITFERPATKGAKARQVTQEIKVVRVTLKAPWRPDRTLPDVT VTALLATEVNPPAGEEPLNWLLLTNLAVQSAQEAIETLSWYLCRWQVEIFFRILKSGC RIEELQLETRERLEPALALYMIIAWRVLYLTMLGRECPELPCDAVFAEEEWKAVYLVT …	x
x	x	plus	pending	Thiosp_03566	3898452..3898607	51	hypothetical protein	MSMIFDIFTKQDFQGSNNKRKYIPNIRVIERVLWWCVWRSLKGR QRYTAAK	x
30	idi	plus	pending	Thiosp_03567	3899719..3900345	208	isopentenyl-diphosphate delta-isomerase	MTGRRGLDEEMTPLSTHATVSFDDEPLILVDSDDTVTGYQNKAQ AHEGEGVLHRAFSIFLFNPQGEVLLQQRSGEKPLWPLFWSNSCCSHPRRGESYQEATH RRLREELAVDTELDFIYRFEYHAPFQDIGSERELCSVYIGRLDDTQAIDVNPSEIADW RWLSLTDTDALVATHGQAEPPERITPWFVMEWQRLRSDFPERIEQLAL	Singleton
x	x	plus	pending	Thiosp_03568	3900384..3900878	164	Putative lipid carrier protein	MPLPVQVSSSEKTPTIPRLFTWPLGFVPAKLQTGALTQILNRVF APELSDGELDFLDEKVMRIRVEDVGLEYRLTLTNGKLRAAQPGQAEDLSIEGNAYEFL LLATRQEDPDTLFFNRRLRLGGSTELGLYVKNFLDGLELEPRLGPLLPVMKGATGVLG RFGR	x
x	x	minus	pending	Thiosp_03569	RC_3900882..3901811	309	putative protease	MSQTDHRPSDRPGPRLSLGPISYYWPKDKVDAFYAQAATLPVDI VYLGETICGKRNELRLEDWLAIGERLAEAGKEVVLSTLSLLEAESEMMRLRAICDNGR FLVEANDMGAVQLLQGRPFVVGHSVNVYNDRSLQVLARGGLKRWVLPVELTADTLAEM QRLRPDGIETEVYAYGRLPLAYSARCFTARARNLPKDDCQYCCIDYPDGLVVSTQDEQ GFLALNGVQTQSAATNNLLPELDRLRELEVDILRINPQAEGTGEIVRLFDQALRGECS PAEASKKVNALTPSGACDGYWHGAAGMDQVANA	x
x	lfcA	minus	pending	Thiosp_04080	RC_4407762..4409429	555	Fumarate reductase flavoprotein subunit precursor	MAVVAQWYQRADSNSMKGPQVLVVGGGIAGLCAAISARRAGARV LLVESAPRWRRGGNSRHGRNFRFCHDQPSALVPERYQADEFTEDLARATAGTGDAALT RLLIERSRAAPRWLLDSGVALQERNRGTLPFSRKTAFLLGGGQAMVNALYAQAERLGV DVRYGCVANRPCLRGNRLASIELRSSSQSGTSGQSGQSSASGLTGQAAESGGVPGRSS LELPQELVLEPAPEHPPEQAPKLTSETLTPDAVVLACGGAQGNPDWLRQHCGERVEGF INRGTPEAHGKLLIELLAAGAQAVGDPSRLYLVAVDARSPPADGGIVTRIRGMPQGMV VDRDGLRRHDEGADRGSTRYARWGQRLADYPGQIGYLLLDAAALREVPAALYPPLVAP …	x
x	cbiF	plus	pending	Thiosp_04081	4409554..4410339	261	Cobalt-precorrin-4 C(11)-methyltransferase	MGKLWFIGAGPGAADLLTVRATRLLGEAGAVLYTGSLVAGAALQ WAGPDCEIADSKGMDLSEVRAWLLERLGQHQTVVRLQTGDPTLYGVIPELARPLDAAG IEIGIVPGVSSAMAAAAAAGESLTLPEVTQSVIFTRLASRTPMPASESFADLARHGCT LCIFLSIDRIEEVVAELRRAGWAEDAPVVVAHKVSWPDEERILRGTLADIAAECRAAG IDRQALILVSPALGARDRAGDDRVSKLYDAAFPRRFRQNRLSR	x
42	pucC	minus	pending	Thiosp_04082	RC_4410336..4411787	483	PucC family protein	MATNRSPIDDLKQIGMQLLIRFLPFADAATDDLPLPRLLRLSLF QISVGAAIVLLNGTLNRVMVVELGMPVWLVSLMVALPLVFAPLRALIGHRSDYHHSAF GLRRVPYIWWGTLLQFGGFAFMPFALLLMSAEGNNMAILGYIAAAAAFLLVGAGLHTT QTAGLALATDLAPKDTRPRVVALLYVTLLVGMLLSAVIYGLLLRDFTQVKLIQVIQGT AGLTIFLNLTALWRQEAIDSKRAASRIRAPKFSSSWKAFVEDRYAARLLIAVGLGTAA FSMQDILLEPYGGEVLGLTVSQTTLLTAIWAGGTLIAFSLAGWLLTRGGDPNRFAMVG AALGVFAFVAVIVAGTLDMPWLFRTGAWLIGFGGGLFAVGTLTAAMGLAHGGHSGLAL …	x
38	bchB	minus	pending	Thiosp_04083	RC_4411942..4413603	553	ferredoxin:protochlorophyllide reductase (ATP-dependent), subunit B	MELTVWTYEGPPHIGAMRIAASMEAVHLVLHAPLGDSYADLLFT MIARSAGRPPVSYTGFQARDLGGDTAQLVKTRLAETVERFKPQALLVGEACTAELLQD QPGALAEGMGFDIPVISLELPAFTRKEAWGASETFHQLVRSLLNGRPVPQGAGDPSAR AKAEGRRPRANLLGPTALGFRCRDDVIEVTKLLDTLGVDVHLVAPAGATPADLARIPE ADFNICLYPEIAHSTCVWLERMFKQPRVRTVPIGVGATRDFVFEVARLAGLDPAPALA QARTRLPWFSRSVDSTYLTGKRVFIFGDATHVMAAARMAREELGFDVVGLGTYSREFA RELRALAEDIGVEALITDDYLAVEARVAELHPELVLGTQMERHIAKRLGIPCAVISSP …	x
37	bchN	minus	pending	Thiosp_04084	RC_4413616..4414887	423	ferredoxin:protochlorophyllide reductase (ATP-dependent), subunit N	MTAAASGDCAATPEIHHERGERQTFCGLAGIVWLHRKMQDSFFL VVGSRTCAHLMQSAAGVMIFAEPRFGTAVLQDRDLAGLADANDELDRVVRELLARRPD IGSLFLVATCPSEVIKLDLDTAAARLQQAHGERVRILAYSGSGLDTCFTQGEDTCLQA LVPLLPELPTLQRSLLIVGSLADVVEDQFTRLFDRLGIGPVHFLPPRRVADLPPVGPG TFLLAAQPFVGETIDALRARGAHLIESPFPLGVEGTRAWLMAAAGAWGVAPELVEEAI AAPAARAEKALARYREQLGGKRISFLPDSQLEIPLGRFLARECGMQIGELGVPYLDRR IMEPELALLPADTQLTEGQDLERQLDRLRADRPDITVCGLGLANPLEAEGLTTKWSIE …	x
36	bchF	minus	pending	Thiosp_04085	RC_4414884..4415387	167	2-vinyl bacteriochlorophyllide hydratase	MTRPTQPLYTPEERRRRDETPWTLVQGILAPVQFLVFLVSLGLV LRYLATGHGELAATWSIVIKTLILYTIMITGSIWEKVVFGKYLFAGPFFWEDVFSMLV LALHTAYLVVLLTGWLDTRGQMWVALAAYATYVVNATQFILKLRAARLSSQASTQAGA SAAGGGE	x
34	ppsR	plus	pending	Thiosp_04086	4415998..4417434	478	transcriptional regulator PpsR	MKLFDAPESALGDLGTEAAAELIAAASDIALILDNEGRVLDLAF GNDELSAQIGDWIGMDWADTVTSDSRDKVELLLSSARADEQPPHWDQVEHVALSGDEL PVRYCAASLGNRHRIVAVGRSQQGMAALQQRLVDAQQSLERDYWRLRQLETRYRLLFR SMSEAILIVDPGNGKIVEANPAASLLLAADSRKLVGRAFPEGFDATGTEAIKSLLAGV RSAGRSADVRARLTERDIEFLISAAPVRQENATLLLVRLSPVETESNTSMAGEPRSRL FKMLENAPDGVVITRQDGRILSANNAFLELAQLSTEEQVRGESLDRWLGRPGVDLNVL IANLRQHGAVRLFATSIRSDYGSSSEVEISAVAVQNADQPSFGFIIRNVDRRVSAGGS …	x
33	bchG	plus	pending	Thiosp_04087	4417451..4418374	307	bacteriochlorophyll synthase 33 kDa chain	MSEASSPPSQVPTQTKPNRIKLADVLEFMHPITWFPPMWAFTCG VVSSGQPILTNILVLIAGVILAGPLLCATSQAVNDWFDRHVDAINEPDRPIPSGRIPG RWGLYIAIIWSVMSLLWSLWLGPWVIVATLLGIALAWAYSAPPARLKQNGWWGNAAVG FSYEGLAWVTGTAVMLGGMMPDWRSLTLAFLYSVGAHGIMTLNDFKAIEGDKQLGVRS LPVQLGPDRAAQLASIVMLVPQIIVVALLFSWSQPWHALAVSVLVAIQGAMMLRFVKA PIERATWLSAFGVTVYVSGMMISAFASRALV	x
31	bchP	plus	pending	Thiosp_04088	4418430..4419674	414	geranylgeranyl diphosphate reductase	MPELQTYDVVVIGGGPAGATAATDLARRGRSVLLLDRPGRIKPC GGAIPPIAISEFEIPDEQLVAKINSARMVAPSERHVDMPINGGYVGMVDRAPFDEWLR ERAAAAGATRRNGSYQRIDRDSDGTAIVHFQPEEAGSKTEAKPAPEQVRARAIIGADG AMSRVAKDCVPGAKELPHVAAYHEIVRSPDAGHADFDPSRCDVYYQGKISPDFYGWVF PHGETTSVGVGTELKGFSLKQATADLRKAAGLEDCETLRCEGAPIPLHPLKKWDNDRD LVLAGDAAGVVAPASGEGIYYALTGGRLAADAVEQFLITGDAKALASARKRFMKAHGR VFWILGIMQRFWYKSDKRRERFVSLCDDPDIQHLTWEAYMHKRLVRAKPAAHLRIFLK …	x
x	x	plus	pending	Thiosp_04089	4419882..4420166	94	hypothetical protein	MESLFASGRIIDPILIMVLVEAVVLWLLHRATGRGPGLKPLLPL LASGFLLLLAVRAALVQAPWPLIALPLAAALLTHILDLLLRWPRKHPSRQ	x
x	gmr	plus	pending	Thiosp_04090	4420166..4422790	874	Cyclic di-GMP phosphodiesterase Gmr	MASPPSQSPTASHRANEQRFRTLVEVNQVAIMELDTQGRFRYAN PAACRMLGYTHERLVQMEVADLLPAEEAEQLHRDMAYFVAEQPEPFTYTNHNRTGDGR WIEVQVDWNYLRDDSGAVIGFVSISSDITAFRLSQRLLDGRNAVLEQLARGAPLEEML RAIVDYSQDIMRDAWISIHLLDAECGQLHSAISSRLPSSYLQAVEGVRIGPNVGSCGH AAFTGERTIASDLRSDPKWDGYRDLVLPLGLLACWSEPILGRDGQVLGTFAIYLPDAR APEPADLQLIASAAELASIVIEHQEDANARKVAEERAQLLLNSTVEGIFGIDLDERIS FANPSTARLLGGSAEALTTADLIGRDPHALFHYANAAGEPLPRSECRMLRAAREACQQ …	x
x	ligA	plus	pending	Thiosp_04230	4575561..4577606	681	DNA ligase	MSQPETNSAEVRAAELRELLEYHNHRYYVLDDPEIPDAEFDALL LDLQQIEHHHPELRTADSPTQRVGAPPAERFSPARHVVPMLSLGNGRNEDDLREFDQR IRRELGLEEIHYVAEPKLDGLAISLSYQDGVLTRAATRGDGHTGEEVTAQVRTIGAVP LRLQGTGWPRLLEVRGEVYLPLAGFEALKERMLANGQTPFKNPRNAAAGSLRQLDPKI TASRPLTMFCYGFGAVEGGDLGPTQSGALAKLRDWGLRVSPESTRVTGAEGCIQYQRA IGERRDTLDYEIDGVVFKVDDLSAQQRLGFRARDPIWAIAYKYAAREEQTRVRAVEFQ VGRTGAVTPVARLEPVDVAGVTVSNATLHNIDEVQRKDVRAGDSVIVRRAGDVIPEVV …	x
x	x	plus	pending	Thiosp_04231	4577793..4578074	93	hypothetical protein	MPELSQEQQILIAMRKTLASVIKDVTPPPGMKHPLSESTIEDVR QCFALISAREKELADLDGRGGERPYYPDQEQSAQVIPVTSLGKKPRDIH	x
25	pufA_3	minus	pending	Thiosp_04232	RC_4578231..4578374	47	light-harvesting protein, PufA	MHKMWQILDPRRTLIAVVAFQLMLGLLIHLILLGTDLNWLSDGI PPL	x
24	pufB_3	minus	pending	Thiosp_04233	RC_4578446..4578586	46	light-harvesting protein, PufB	MAEKSMTGLTDAEAKEFHGIFMASMSAYFGLVVFAHLLAWMYRP WL	x
25	pufA_2	minus	pending	Thiosp_04234	RC_4578766..4578999	77	light-harvesting protein, PufA	MSTNNMAGMYKIWTFFDPRRTLVAIAGFQLVLGLLIHFILLGSD LNWLDDGIPTSYMGAATASVGQMSAMPETRTIN	x
24	pufB_2	minus	pending	Thiosp_04235	RC_4579101..4579241	46	light-harvesting protein, PufB	MAEKSMTGLSDNEAKEFHGIFMSSMTAYFGLVVFAHALAWMYRP WL	x
28	pufC_1	minus	pending	Thiosp_04236	RC_4579333..4580529	398	photosynthetic reaction center, cytochrome	MKMRNRNALALLSLGATAFIVGCEAPPPEIVQNGYRGLAMQQNY NPDLLKELVDANQAPDAIPAATPGGGLAKDVYKNVQVLGDLTVNEFNRTMVALTTWVA PKEGCTYCHEGVQWESDGVYTKIASRRMLEMTRASNSNWTDHLAQTGVTCYTCHRGNP VPEYVWTSDPGPDHPSGFTPTGQNTIGYATGYTSMPYDPFTPFLLGDQDIRIIGQTAL PTGNRKSIKQAEWTYSLMGHFMDGLGVNCTYCHNSRSFYAWDQSTPKRTTAWYAIRHV REMNNDYVAPLGEVLPASRKGPLGDAFKVNCKTCHQGVYKPLFGAPMAKDYPALYEAA AAEAAPAETAAEAPSPAAPSPVAEAKPADQAAAEPAAPAAPPMQYVPAPMRYQPAPMP …	x
27	pufM_1	minus	pending	Thiosp_04237	RC_4580526..4581500	324	photosynthetic reaction center, subunit M	MPEYQNIFTRVQVREPGYPGVELPRGSLPRLGKPIFNYWIGKIG DAQIGPLYLGGWGIASLIAGFIAIEIMGLNMLASVDWSPILFLKEFFWLALEPPPPAY GLSFPPLAEGGWWLIAGFFLTLSILLWWVRVYKRAVDLGMGTHLAWAFAAAIFFYLTL GFIRPILMGSWGEAPPFGIFPHLDWTAAISIRYGNFYYNPFHALSIAFLYGSAVLFAM HGGTILAVSRYGGDREIDQITDRGTAAERAMLLWRWCMGFNASMESIHRWAWWFAVFT VITAGLGILLTGTVVENWYLWAVKHGFAPTYPSELSIENPYLTQGVSQ	x
26	pufL_1	minus	pending	Thiosp_04238	RC_4581516..4582337	273	photosynthetic reaction center, subunit L	MAMLSFEKKYRVRGGTLVGGDLFDFWVGPFYVGFFGVSTVFFAT LGTLLIIYGAALGPTWNLWAISIAPPNLDVGLGVAPLREGGLWQFITICAIGAFVSWA LRQVEICRKLGIGLHVPFAFSFAILAYVTLVVIRPVLLGAWGHGFPYGIFSHLDWVSN IGYQTLHFHYNPAHMLAISFFFTNCLALAMHGSLILSVVNPRDGEPVKTGEHENTVFR DIVGYSIGALGIHRLGLFLAINAAFWSAVCIVLTGPFWTRGWPEWWMWWPNLPIW	x
25	pufA_1	minus	pending	Thiosp_04239	RC_4582461..4582664	67	light-harvesting protein, PufA	MNESLQNLHKVWLLINPAQVLVALGVFQIVLGLGIHMILLSTDL NWLDDGVPVTYQAQAASAAPQNK	x
24	pufB_1	minus	pending	Thiosp_04240	RC_4582766..4582906	46	light-harvesting protein, PufB	MAEKSMTGLTDAEAKEFHGIFMASMSAYFGLVVFAHLLAWMYRP WL	x
x	x	minus	pending	Thiosp_04241	RC_4582935..4583159	74	hypothetical protein	MKKAASQLKALCSVFGTSYVRGADAFRASEVLVAFLCTQEAHSR PGNRTSGLLGHLLASTPVMVRRGRADSRKA	x
22	bchZ	minus	pending	Thiosp_04242	RC_4583156..4584652	498	chlorophyllide a reductase subunit Z	MLVLDLDRAGGYWGAVYVFTAVKGLQVIIDGPVGCENLPVTAVL HYTDALPPHELPVVVTGLGEEELGQEGTEQAMKRAFATLDPKQPAVVVTGSIAEMIGG GVTPAGTNIQRFLPRTIDEDQWQSADRAIFWLWTQFGAKGKRAKGKAANQKGKGKIAN ETAAKPSVNIIGPAYGCFNTASDLAEVRRLVEGMGAEINMIFPLGAHLDEIPRLADAD VNICMYREYGRKLCEALEKPFLQAPIGLHSTVAFLRKLGELLGLDPEPFIEREKHTTI KPIWDLWRSVTQDFFGTASFGIAATETYSRGVRHYLEDELGMPCHFAIARRPGVKTDN AATREAVRGKTPLVVFGGYNERMYLAEAGGRAAFIPASLPGTLVRRHTGTPFMGFSGA …	x
21	bchY	minus	pending	Thiosp_04243	RC_4584652..4586172	506	chlorophyllide a reductase subunit Y	MLRPIDNQALRAPELVPDQISAASAGGCHAGPNASEHHLRRAAE ASGQSELLERFAADYPAGPHDRPQTMCPAFGSLRIGLRMRRTASVLCGSACCVYGLSF TSHFYGAKRSVGYVPFDSETLVTGKVFEDLRDAVEQLADPEQYDAIVVMNLCVPTASG VPLRLLPQSINGVRVIGIDVPGFGVPTHAEAKDVLCGAMLNRARSEAETGPVQAPRGG RSEKPTITLLGEMFPADPVGIGMLLEPLGLAAGPVLPTREWRELYGALDCAAVAAIHP YYVASIREFEQAGRPIIGSAPVGHDGTEAWLNAVGEACNIKADLVAAAKNAVLPAIKG ALSGAPINGTITVSGYEGSELLVARLLVESGANVPYVGTATGRTRWADADREWLESKG …	x
20	bchX	minus	pending	Thiosp_04244	RC_4586206..4587186	326	chlorophyllide a reductase iron protein subunit X	MFNAGSHLMPEQPSGMPESGGGSASKRPEIIAIYGKGGIGKSFT LANLSYMFAQLGKKVLLLGCDPKSDTATLLFGGRSCPTIIETSSKKKLAGEPVEIGDV CFKRDGVFAMELGGPEVGRGCGGRGIIHGFELLESLGFHDWDFDYVLLDFLGDVVCGG FGLPIARDMCQKVMLVASNDLQSLYVANNVCSAVEYFRGLGGNVGVAGMVINKDDGTG EAQQFAKNVGIPVLADIPQDDDIRRKSAAYQIIGKLDSPWAGLFKGLAEQVAAAPPLR TKPLAHEDLLSLFASDAVGRNVVLEPAKPEDMCSVKKIVKPSLEVIYDDA	x
19	bchC	minus	pending	Thiosp_04245	RC_4587179..4588129	316	2-desacetyl-2-hydroxyethyl bacteriochlorophyllide A dehydrogenase	MPIDMNTLAVVLEQPEQLAVRRLDLTPPSPADCVVDIHWSGIST GTERLLWSGRMPPFPGLAYPLVPGYESVGQVVAAGEESGRVEGELVFVPGARCYGDVA GLFGGAAARIVAPGSRLITLPAGLGEQGVLMALAATAYHVTGPQGQQPDLIIGHGVLG RLLARLAVAHGAAPVVWERNPARTSGAEGYQVIDPEQDERRDYRCICDVSGDSKLLDT LIGRLAPGGEIVLAGFYEAPLSFDFPPAFMRELRLRVAAEFKEPDLIAVKQLIESGRL SFDELITHRMPAEQADEAYVTAFSDPSCLKMILDWRHVDV	x
18	crtF	minus	pending	Thiosp_04246	RC_4588346..4589476	376	hydroxyneurosporene methyltransferase	MMETLLARLQDAFYRRRDRLISSPKFQRWAADFPLTRPIAQHRA SALFDLCAGFIYSQILDACVRLELFERLAEQPMTSEELAAQVDLPPAAAERLLRAAVA LRLLQRRMGGRFGLGPHGAAMLGNPGIAAMVRHHRMLYRDLTDPLALLRGELKEKELQ RFWAYAGAETPDAAGDAEVASYSELMTSSHAFVAGDTLDAYSLKGHRCLLDVGGGEGN FLIATGERWPHLKLQLFDLPAVAERAAARLRDFGLGERSETFGGDLLRDPLPRGADII SFVRVIHDHDDDAAMTMLRAARAALPDGGTLLLTEPMSETPGAEPIGDAYFGLYLFAM GSGRPRPPRELKAMLKAAGFSAVRLHRTRRPMQTRVMTAKAN	No CrtEF fusion protein
17	crtE	minus	pending	Thiosp_04247	RC_4589555..4590430	291	geranylgeranyl pyrophosphate synthetase	MDVMPRIEQALERAIAQGSGEAAPPLLEAATRHAVFPGGGRIRP RLCLAVALACGDDAPVLSDAAAAALELLHCASLVHDDLPCFDDAATRRGRPSVHAAYG ERLAVLVGDGLIVRAFELLAWNAGSHPERAARLASIIGRAVGIASGIVAGQAWECEPE VELTEYHRQKTAALFFAATEAGAAAAGHDSAPWYGFGEKLGLAYQVADDLRDVAVSEA DMGKPKGQDQAHGRPSAVAELGLDGAIGRLRELVAAAVDGIPPCPGQEQLAALVRQEM RRLLPAELADRLDAG	No CrtEF fusion protein
16	crtD	plus	pending	Thiosp_04248	4590838..4592406	522	phytoene desaturase family protein	MSLGRQSERVIIVGAGVGGLASAITLAAQGLEVEVFERAPTPGG KLREVAVGDARIDAGPTVFTMRWVFEELFAAAGTSLEAELPLQPAEVLARHAWSEQER LDLFADQQRSADAIGQFAGAREAEGFLRFTADARGIFNTLKDAFITNTRTTPAGLMQR VGIGGIGALMNIRPYSKLWPVLGEYFKDPRLQQLFGRYATYCGSSPFLAPATLMLVAH VEQEGVWLIEGGMHRLARTMAGIAERLGVRINYSAPVAEILIEQGRARGVRLDSGETH KAAAVVLNADTAALGAGLFGHAATRALGPTPADKRSLSALTWSLTAETSGFPLVRHSV FFSRDYPKEFQDLLQRRRLPQEPTVYICAQDRSDSGQTTAAGYPVTGPERLLCLVNAP …	archetypal CrtD protein
15	crtC	plus	pending	Thiosp_04249	4592529..4593287	252	hydroxyneurosporene dehydrogenase	MLYGASGKRWAMTERGHNRLQRSPTELSIGPSALHWDGDDLVID IQETAAPIPLPLRGQVRVHPQAPTRHLQQLDRQGRHHWWPIAPDSRVSVNLSHPRLSW SGDGYLDSNWGSEPLEQGFTDWDWSRAKRRQGGAAVLYEANRRDGSSLSLALQVNKDG SVEHFEPPARAPLPTTRVWRIPRATRSEQPESGEPPVRVIETLEDTPFYARSTITTRL VGEPVTAVHESLSLDRFAKRWVQMLLPFRMPRWT	x
x	x	minus	pending	Thiosp_04250	RC_4593309..4594898	529	HDOD domain protein	MAPLDRGAGSGRALPTTLNAWTNFLTDTELPAFARTVSEVNRIA DDPEASAWKLSSAISKDAAMAARLVKLANSPLFPSSHGNIQTVDRGVVLLGFDAVRDL AISLSVIEQVLRGQSRDALLEEMALAFHTATQSQTLARMAQDDGVAEIFVAGLLYRIG SLAVLSGSDPRVNDFLVEKAEIAVGESSQVTRLEKRTFGCDMTQLSRRLAQHWSLGHS LQKALAPESSPLADRIATARRVAEVSMRCGWESNQTHQLLARVARTMGLNLPDMREKV HESSEVAREMAVQFGATKVAPLIPETSKARARREKAEKKALDDINGDGIDGAESHGKQ GAGDDAGSGADSGGDDEMSGLLRPNPVVQLEMLGRMAEQLGGKPDLNLLLNTVVEGVH …	x
x	tgpA_1	minus	pending	Thiosp_04251	RC_4595152..4597266	704	Protein-glutamine gamma-glutamyltransferase	MPKVATSFKETAPDRLQIGLLSALLALAALPLLFYMRAPVAVFI GLLLLLRVAVLLRPALAPGRWPLVALALLGVGVVLGAYRELAGQDAGTALLLTMMVLK TLEVRGMRDLRVSLLLFGFLLVVAFLFNQSPLFAAYLAALLLGSFALLADLSAVRANP ASDSRHQATGPAAGQAGGREGRKSGGQVWLRRLWRERLRVAGRRALVLSAQAVPLAAL LFLLFPRLDAPLWSLGLERDRAKTGVSDSLELGNFSELVRSGEVAFHAYFDQPLPVEP SQLYWRGPVLWQTDGRGWEPGPQELMTGLAADIEPLGDRLDYAIVMEPTEQRWIFALD LPLAAPADARLTRDARLVSKEPLQELKRFELRSALSYRSLALSDAERELALEVPQRVI …	x
PGC proteins of Rhodobacterales without homologs in Thiorhodovibrio litoralis 06511
No	Gene	Strand	Accession	Locus Tag	Range (original)	Size (AA)	Protein	AA	Comment
32	pucC1	x	x	x	x	x	PucC family protein	x	x
47	acsF	x	x	x	x	x	magnesium-protoporphyrin IX monomethyl ester aerobic oxidative cyclase	x	x
04	crtA	x	x	x	x	x	spheroidene monooxygenase	x
13	crtK	x	x	x	x	x	CrtK protein	x
49	hemA	x	x	x	x	x	5-aminolevulinic acid synthase	x	BioF paralog
23	pufQ	x	x	x	x	x	protein pufQ	x
35	ppaA	x	x	x	x	x	regulatory protein Ppa	x
46	PS gene	x	x	x	x	x	hypothetical protein	x
50	cycA	x	x	x	x	x	cytochrome c-551	x
60	pucB	x	x	x	x	x	light-harvesting protein B-800/850, beta chain	x	x
61	pucA	x	x	x	x	x	light-harvesting protein B-800/850, alpha chain	x	x
62	pucC3	x	x	x	x	x	light-harvesting complex assembly protein PucC3	x	x
63	pucDE	x	x	x	x	x	light-harvesting protein B-800/850, gamma chain	x	x
Marker proteins of the Calvin cycle in Thiorhodovibrio litoralis 06511
x	ribH	plus	pending	Thiosp_00008	RC 9795..10262	155	6,7-dimethyl-8-ribityllumazine synthase	MIKSLEGAFRPGSVRFCLVVARWNSFIVEHLEQGAIDALKRHGV EEGNIAIFRVPGAFEIPLALEKIAAKGGYDALIALGAVIRGGTPHFDYVAGECVKGIA QVSLNHGIPVGFGVLTTDTIEQAIERAGTKAGNKGAEAALSAMEMANLFSQIG	x
x	ribBA	minus	pending	Thiosp_00009	RC 10340..11473	377	Riboflavin biosynthesis protein RibBA	MSLNTTEEIIADLRQGRMVVIMDDEDRENEGDLLLAGECVSPEA INFMAKYGRGLICLTLSKERSERLRLPLMVDNNRAAHSTAFTVSIEAAVGVTTGISAA DRARTIQAAVAANACPTDLVQPGHVFPLIAQPGGVLVRAGHTEAGCDLARLAGFEPAA VIVEILNEDGSMARRADLEDFAREHGLKIGTIADLIHYRVANEKAVVRLDRCKLQTEF GDFLLTAYRDTIDDQVHLALTYGDISPERPTLVRVHLQNSLCDLFGGSSAGCGWPLRH AMRQIVAEGEGVIVVLRNRDSCEDILAKVRQISQTKTSDNASPLRTDRHELRTYGIGA QILSDLGVRLMRVMSAPKAMHGISGFDLEVVEYVRGADGEPGR	x
x	ribE	minus	pending	Thiosp_00010	RC 11513..12169	218	Riboflavin synthase	MFTGIVQARGRLARIEKVAGDSRLTIQCPELDLSHTGVGDSISV NGVCLTVVSLVGDGFRADVSQETLGLTTLGELPEGSPVNLERALTLSSPLGGHLLSGH VDGVGTLLDLREEARSLRLQIHAPGELAPYIARKGSIAVDGISLTVNDITGSVFLLNI VPHTREVTTIANYRKGTPVNIEVDLIARYLERLILGQSGRSVEGSSLNKEVLARHGFL	x
x	prk	minus	pending	Thiosp_00011	RC 12324..13214	296	phosphoribulokinase	MSKKHPIVAVTGSSGAGTTTVKRAFEHIFYRDGIRAAVIEGDSF HRFDRVEMKAEMAKAADEHRTLSHFGPEANRFDLLAELFHTYGDTGMGKRRYYLHSKE EAAEHNNRLGSKLEPGQFTPWEDIETGTDLLFYEGLHGLVVTDNDNVAEHVDLGVGVV PIVNLEWIQKIHRDNLERGYSAEAIVDTIMRRMPDYIRHITPQFSLTDINFQRVSTVD TSNPFIARDIPLPDESFVIIRFREPEKLEIDFPYLLAMIHDSFMSRRNTMVVPGGKMG FAMEVILQPIIERMMASRNV	x
x	x	plus	pending	Thiosp_00012	13498..14043	181	hypothetical protein	MPYHLTDQLAENSTGKGFLSIILLLFVTVAGSSAWADEDTGADT GAVPETPQVRDAYARAVPPGQQNSAAFMHISNPGHQTMALVAAESSVARVVELHTHVQ EDGMMKMRRVERIELPPATEVVLQPGGLHLMLIGLKQPLAPGDPVDLHLVFDTGKTID ITADTRTIMPAQRMHHNGQDH	x
x	x	plus	pending	Thiosp_00013	14132..14854	240	Cytochrome c4	MRVTDCGQAELVTARATPAGMAKPRFKQMVGIMKRVLITGILVA GLAATSLQAGTITGNAEKGKEKAGQICQACHGIDGNGVPAQPIWPKLAGQHPNYIYKQ LNNFKNDERANVQMTPMAKPLTDEEMRNVAAYYSSLPQSGGEAEADKVELGEKIFRAG NPATGVPACSGCHGPAGMGTNLSRFPRLAGQYPEYVDQTLKLFRKMERANDPNGMMRG VAARMTDDEIAAVAQYISGLRQ	x
									x
									x
x	x	plus	pending	Thiosp_00264	278101..278826	241	SCO1/SenC	MPEPHSAPRPVRNPVRKPAPNPALNQVQAARLGSLWSRRLLPLT ALALALLLAWLWFGWHPQAPSHQLRDEQRPQAAGGDFALQSAAGPLHLEDFRGKLVLL YFGYTACPDVCPTNLAMLGMALRALEPEERDRVQVIFVSVDPKRDDLAHLQTYAAYFH PDIIGATGSDTELRALADRYGAVYRVSEDPSSAMGYLIDHSASTYLIDTKGRLREALG HATPAEQIVARLRRYLVENRLPG	x
x	x	plus	pending	Thiosp_00265	278848..279276	142	secondary thiamine-phosphate synthase enzyme	MKTVLDEITLATHQPIEIIDISAQLRECCARSGIRTGLATLISR HTTAYVNLNEREPQLQLDMLAFLKRFIPRDGDYRHNVAPVDDRDNAHAHLLGLFMNAS ETIPVVDGKLMLGDWQSVFFIELDGPRPSRALTLQFLGEG	x
x	rbcL	plus	pending	Thiosp_00266	279281..280591	436	ribulose-bisphosphate carboxylase	MNATDARGFFASAEDIVLEDHLLLDYVFECQGDPELAAAHLCSE QSTAQWARVGVDEDYRPRFAAKVLELEIQPSPAGWTVPMPGLGEGPVHRCHVRIAHPH ANFGPRIPNLLSAVLGEGAFFAPGIPLIKLLDIHFPASFLSAFAGPKFGIQGLREKLR VYDRPIFFGVVKPNIGLAPEPFAELGHQAWCGGLDIAKDDEMLADTDWSPLAERARLL GDACRRAEQSTGVPKIYLANITDEVDRLIALHDTAVAAGAGAVMLNAWPTGLSAARML ARHTKVPLVAHFPVIAAMSRLPFFGVHSRVITKLQRLAGFDVIIMPGFGERMMTPAEE VSACIDACLDPSFGALKPSLPVPGGSDSAATLAAVHAQVGSADFGFVPGRGVFNHPQG …	x
x	x	minus	pending	Thiosp_00267	RC 280650..280922	90	putative Fe(2+)-trafficking protein	MARMVECIKLGQEAEGLERVPYPGALGQRIFDQVSKQAWSEWLK HQTMLINENRLSPMDPKARKFLEQQMEEFFFGEGAEVPEGYVPPKT	x
x	mutY	minus	pending	Thiosp_00268	RC 281101..282198	365	A/G-specific adenine glycosylase	MTTAWLPDAFAATVLDWFAQHGRKDLPWQREPTPYRVWVSEIML QQTQVAVVIPYFECFIARFPTLHALARADLDDVLRHWAGLGYYARARNLHHAAREIEK RHGGEFPQQLDSLMALPGIGRSTAGAVLSLAGGQAHAILDGNVKRVLARCFAVSGWPG QSAVQHRLWVLADELLAAAVGLGPRGDWPGAAAYNQGMMDIGATLCTRGAPRCTCCPL SRQCLALASDQVRCYPKPKPKRSLPRRATRWLLVQDAQGNILLERRPASGIWGGLWTL PEAAMDEDFTSWCERHLGAQATAVEKLADRRHTFSHFALDIHPVRLRFPGLSDRVADD DSRVWLSLEAATKMAVPAPLKRLLLELSEDA	x
									x
									x

## Sheet: Table S6D PGC-Allochromatium
Table S6D: Photosynthesis gene cluster of Allochromatium vinosumDSM 180 (T)
Order of genes in the PGC and localization on the plus and minus strand. The color code and numbering of proteins is corresponding to those of Dinoroseobacter shibae DSM 16493 (Brinkmann et al. 2018). Protein accession numbers are highlighted in blue, corresponding locus tags are shown in black.
Photosynthesis Gene Cluster (PGC) - Allochromatium vinosum DSM 180 (Chromosome; 3,526,903 bp [CP001896]). The PGC is shown in inverted orientation in comparison to Fuchs et al. (2007).
No	Gene	Strand	Accession	Locus Tag	Range	Size (AA)	Protein	Comment
x	x	plus	ADC63452.1	Alvin_2542	2875902..2876933	343	Succinylglutamate desuccinylase/aspartoacylase	MLRELDSLPDGLLETDSRRLAERLGAPTLIHLPGARGPALFVSV LLHGNETVGWEAVRALLRERLERFGELRLPRALSLFIGNVSAAAGGVRRLPGQPDYNR VWPGSEDPETLEHRLMRQVVDIMARRGIFASLDLHNNTGLNPHYACVNRLDARFLHLA RLFGRTVVYFIRPTGVQSMAMAELAPAVTLECGKVAEQAGIDHAREFVEAVLHLSEIP AHPLPAREIDLFHTVAQIRIPETVSFGFDPSDVDLWLDPELERMNFRELPVGTPFARV RPGAETALDVIDERGRDVSARYFRLEDGEWRLRRCLMPSMLTRDETVIRQDCLCYLME RYQPPTAAA	x
x	lipA	minus	ADC63453.1	Alvin_2543	RC 2876957..2877931	324	lipoic acid synthetase	MSTPDTLNAPSRATPDTHQRGQDKLARIPIKVETNAPVLRKPSW IRARAPVGPGVARIKKLLRESKLATVCEEAQCPNLGECFAHGTATFMILGDVCTRRCP FCDVAHGRPQPPDPDEPAHLAESIALLGLRYVVITSVDRDDLRDGGAGHFADCLRAIR ARHPDTRLECLVPDFRGRESVALDQFEGDAVPDVFNHNLETVPRLYREARPGADYAGS LKLLQAFKARHPSVPTKSGIMLGLGETQDEVLDLMRDLRAHDCDMLTLGQYLQPSRDH LPVRRYWTPDEFDALRRAGEDMGFSNVASGAMVRSSYHADQQAGDLVR	x
30	idi	minus	ADC63454.1	Alvin_2544	RC 2877975..2878532	185	isopentenyl-diphosphate delta-isomerase	MPLPAAGDLERAAQRDAVEQLILVDEQDRPIGVAGKLEPHELGQ LHRAFSILVFNAEGELLLQRRADSKYHFASRWSNTCCGHPRPGETTPMAAGRRLKEEF GIRVPLNERAEFVYRAEDEASGLIEHEYLHVFYGVHTEAPRPDPTEIGAWRWMAVPAI KRALRRHPEWFTPWFKLLVERMLID	x
x	rbcL	minus	ADC63455.1	Alvin_2545	RC 2878544..2879917	457	ribulose-bisphosphate carboxylase	MTASDWAGFFADEASLDREAYLFLDYYLECSGDPELAAAHFCSE QSTAQWRRVGSDEDLRPRFGARVVDLQILDGARPEFSYGVGSGSDAPVTACRLRIAHP HGNFGPRLPNLLSAICGEGTFFSPGAPIVKLLDIEFPESYLACFQGPQFGVAGLRERL QVHDRPIFFGVIKPNIGLPPEAFSELGHESWLGGLDIAKDDEMLADTDWCPLDRRAEL LGEARRRAEAATGVPKIYLANITDEVDRLVELHDRAVERGANALLINAMPTGLSAVRM LRKHAQVPLMAHFPFIAPFARLERFGVHTRVFTKLQRLAGYDVIIMPGFGPRMHMTDD EVRACATACLEPMGPIKPSLPVPGGSDWAGTLRPLYEKLGTVDFGFVPGRGVFGHPMG …	x
x	yjbQ	minus	ADC63456.1	Alvin_2546	RC 2879974..2880405	143	protein of unknown function UPF0047	MHFHVEQIQLTTQAPIEIIDLSEQVRQAFARHPVRQGWVTITSA HTTAFVALNEREPKLQQDMLDFLTRLAPPGQTHYRHDIDPIDGRPNTHSHLIGLFMNA SETILVEDGRLLLGEWQSVFFIELDGPRPQRQVRVQIAGLV	x
25	pufA_3	minus	ADC63457.1	Alvin_2547	RC 2880491..2880691	66	light-harvesting protein B-875, alpha chain	MMPQLYKIWLAFDPRMALIGLGAFLFALALFIHYMLLRSPEFDW LLGPDYAPVTLSAGMSALPAGR	x
24	pufB_3	minus	ADC63458.1	Alvin_2548	RC 2880781..2880924	47	light-harvesting protein	MADQKSMTGLTEEEAKEFHGIFTQSMTMFFGIVIIAHILAWLWR PWL	x
25	pufA_2	minus	ADC63459.1	Alvin_2549	RC 2881060..2881194	44	light-harvesting protein B-875, alpha chain (partial)	MHKIWQIFDPRRTLVALFGFLFVLGLLIHFILLSSPAFNWLSGS	x
24	pufB_2	minus	ADC63460.1	Alvin_2550	RC 2881278..2881424	48	light-harvesting protein	MANENRSMSGLTEDEAREFHGIFVSSFVVFTGIVVVAHILVWLW RPWL	x
28	pufC	minus	ADC63461.1	Alvin_2551	RC 2881600..2882751	383	photosynthetic reaction center, cytochrome	MNLGKQLTLPAVAVVASVVLLGCERPPPEVVQKGYRGVAMEQNY NPRLLEASIKANLPVESLPAAAPGGPSVSDVYENVQVLKDLSVAEFTRTMVAVTTWVA PKEGCNYCHVPGNWASDDIYTKVVSRRMFELVRATNSNWKDHVAETGVTCYTCHRGNP VPKYVWVTDPGPNQPSGVTPTGQNYASSTVAYSALPLDPYTPFLDQSNEIRVIGQTAL PAGNTTSLKQAEWTYGLMMQISDSLGVNCTFCHNSRSFYDWKQSTPQRTTAWYAIRHV RDINQNYIWPLNDALPASRKGPYGDPFKVGCMTCHQGAYKPLYGAQMAKDYPALYESA PAEAAPATEEAPAAEAEAVEAAPVEEAAPAPVEQAAAPVEDAAPAPQQL	x
27	pufM	minus	ADC63462.1	Alvin_2552	RC 2882748..2883725	325	photosynthetic reaction center, subunit M	MPEYQNIFTTVQVRAPAYPGVPLPKGSLPRIGKPIFSYWAGKIG DAQIGPIYLGFTGTLSIIFGFMAIFIIGFNMLASVDWNIIQFVKHFFWLGLEPPAPQY GLTIPPLSEGGWWLMAGFFLTMSILLWWVRTYKRAEALGMSQHLSWAFAAAIFFYLSL GFIRPVMMGSWAEAVPFGIFPHLDWTAAFSIRYGNLYYNPFHMLSIAFLYGSALLFAM HGATILAVSRFGGDREIDQITDRGTAAERAAIFWRWTMGFNASMESIHRWAWWCAVLT VITAGIGILLTGTVVENWYLWAIKHGVAPAYPEVVTAVDPYATATGVTQ	x
26	pufL	minus	ADC63463.1	Alvin_2553	RC 2883742..2884578	278	photosynthetic reaction center, subunit L	MAMLSFERKYRVRGGTLIGGDLFDFWVGPFYVGFFGVAGFFFAL LGVLLIVWGATIGPNAELQTYNIWQISIAPPDLSYGLGMAPMTEGGLWQIITICAIGA FVSWALREVEICRKLGIGFHIPFAFAFAIGAYLVLVVVRPILMGAWGHGFPYGILSHL DWVSNVGYQFLHFHYNPAHMLAITFFFTNCLALSMHGSLILSVTNPQKGEEVKTSEHE NTFFRDIVGYSIGALAIHRLGLFLALSAVFWSAVCIVISGPFWTRGWPEWWNWWLELP LW	x
25	pufA_1	minus	ADC63464.1	Alvin_2554	RC 2884702..2884896	64	light-harvesting protein B-875, alpha chain	MSPDLWKIWLLVDPRRILIAVFAFLTVLGLAIHMILLSTAEFNW LEDGVPAATVQQVTPVVPQR	x
24	pufB_1	minus	ADC63465.1	Alvin_2555	RC 2884976..2885116	46	light-harvesting protein	MANSSMTGLTEQEAQEFHGIFVQSMTAFFGIVVIAHILAWLWRP WL	x
22	bchZ	minus	ADC63466.1	Alvin_2556	RC 2885483..2886928	481	chlorophyllide a reductase subunit Z	MLINDLDRAGGYWGSVYVFTAIKGLQVIIDGPVGCENLPVTAVL HYTDGLPPHELPVVVTGLGEEELGQSGTEQAMRRAFETLDPKQPSVVVTGSIAEMIGG GVTPEGTGIVRFLPRTIDEDQWQSANRAMYWLWTQYGQKKGAAKSKPKPRAAGDKPRV NIIGPVYGTFNMPSDLAEIRRLVEGIGAEVNLSFPLGSHLDDVPRLADADANICLYRE FGRTLCEALDKPYLQAPIGLHSTTKFLRALGEILGLDPEPFIEREKHTTIKPIWDLWR SVTQDFFGTASFGVSASETYSRGLRHFLEDELGLPCNFAFARRPGVKIDNDAIRAAVH EKPPLILFGSYNERMYLTEKGARATYIPASFPGTVIRRHTGTPFMGYAGATYLVQEVC …	x
x	x	minus	ADC63467.1	Alvin_2557	RC 2887008..2887253	81	protein of unknown function DUF2442	MYPSVTKVEPRKNHQLYIEFDNNECGILDVKPYLNFGVFSKLRD EAVFSNVRVSFDTIEWSNGVDLDPHFVYEKCIKCAES	x
x	x	minus	ADC63468.1	Alvin_2558	RC 2887263..2887529	88	conserved hypothetical protein	MPTISMFYGVIIRMYFAPNEHPPPHFHVYYAEFKALVDIRTCEI MEGNLPKKQAKLVLAWAELHQDELMANWSLVMNGEEPFKIQPLQ	x
x	x	minus	ADC63469.1	Alvin_2559	RC 2887766..2888239	157	conserved hypothetical protein	MNIIQVDSYNLPIYLNLCQSYEGEFSAITDKKPNENGLFELDTQ IGGNVLGYLLYEKKSPIGLAAVKAKLGAQCFEVCEFYVVPSFRKQALGKRFAIEIFKM HQGRWEIKQISGAEYATKFWQKTVGEFTGNNFQEDLYQDEYWGQVVRQQFLSAGS	x
x	x	minus	ADC63470.1	Alvin_2560	RC 2888484..2889062	192	conserved hypothetical protein	MEKLTIDQLHELRLHIFDNAESLHKEAKLLLDNGFYARAFLLAY FTCEELGKIPIVVGVIGRMLKNETVDWKKVKKRFRDHKAKVDSDDFHKYFFGVEVDLL RDSDLKWLDAARAASKDRVNQKNNSTYVDVQGVAVTSPLEQITKEQSVEMLERSFQSL RAHWQAESMTNPIVVAAKKLLQATPKSGAHEL	x
21	bchY	minus	ADC63471.1	Alvin_2561	RC 2889172..2890557	461	chlorophyllide a reductase subunit Y	MVQESSTACATAGERPRGPHDQPQTMCPAFGALRVGLRMRRTAM VLVGSGCCVYGLSFTAHFYGARRSIGYVPFDSESLVSGRLFEEAREAVLKLADPDKLD TIVAINLCVPTASGVPLRLLPKELNGVRILGIDVPGFGTPTHAEAKDVLAGAMLQYAR LEAEQGPVQAPRGGRSERPTVTLLGEMFPADPVGIGMMLDPLGLAVGPVVPTREWREL YAALDCTAAAAIHPQYQASAREFAAAGRPVVGSAPVGRDGTAAWLDAIGQACGIAQDK VDAAKNKFLPAIGGALAAMPIKGRVIVSGYEGSELLVARLLIESGATVPYVGTACPRT PWNEADLAWLEERGVPVQFRASLEQDLAAVESLEPDLAIGTTPVVQAAKERQIPALYF …	x
20	bchX	minus	ADC63472.1	Alvin_2562	RC 2890576..2891526	316	chlorophyllide a reductase iron protein subunit X	MTVSVNIPAPSAPSLKQTQIIAIYGKGGIGKSFTLANLSYMMAQ QGKKVLLIGCDPKSDTATLLFGGRNCPTILGVSSEKKKAGEQVAISDICFKRDGVFAM ELGGPEVGRGCGGRGIIHGFELLEGLGFHEWDFDYVLLDFLGDVVCGGFGLPIARDLC QKVIIVGSNDLQSLYVANNVCSAVEYFRGLGGNVGVAGMVINKDDGTGEAQAFAAAAG IPILATIPAHEEIRRKSANYEIIGRPDGPWGPLFAELAGHVAEAPPVRPNPLAHEVLL DLFKGDQVGRHVVLEPARPEDMSDISASVKPSLEVVYDDA	x
19	bchC	minus	ADC63473.1	Alvin_2563	RC 2891523..2892587	354	2-desacetyl-2-hydroxyethyl bacteriochlorophyllide A dehydrogenase	MPNLEALAVVLEAPERLALQRLPLTPPEAGDVVVDMEWSGISTG TERLLWSGTMPPFPGMGYPLVPGYESVGRVSYAGPDSGLTVGQRVFVPGARCYGEVRG LFGGAASRVVAPGARLLPVPESLGEQGVLLALAATAYHAIAAPAASTPAHAALRAESA ASATASGASASSVATADVGTAPAPHVELVVGHGVLGRLLARIAALGEGTRPVVWETNP VRHSGAEGYGYDVMLPDDDPRRDYRTICDMSGDARILDSLVARLARGGEIVLGGFYHE PVSFTFPPAFMREARFRIAAEFQPSDLAAVRDLLDSGRLSLDGLITHCVPATEADSAY RTAFGDPSCLKMILDWRTHS	x
18	crtF	minus	ADC63474.1	Alvin_2564	RC 2892723..2893835	370	hydroxyneurosporene methyltransferase	MRLPEPLLALRNRVLSKPEFQRWASIFPLTRPRAQRRARELFDI VAGFVYSQILQACVQVRLFEILAEGTQSVDDLAPRLGLPVEGARRLLRAAASLELAEA RGDDRYALGELGAAMVGNPGIAAMVEHHAMAYADLKDPVALLRGELPQRALQGYWAYV GAEAPAAAGEQAVSGYSELMAQSQRLIADDVLDAYSLQEHRCLLDVAGGDGTFLVTAA KRWPHLRVILFDLPAVAERARARFQREGLGDRATAIGGDVRRDPLPEGADVVSLVRVL HDHDDHDSPNFARAACQALPAGGRLLVAEPMSGTPGAEPIGDAYFGFYLLAMGSGRPR TPAELTEMLRGVGFDRVRQMRTIRPMLTQLLVAQRA	x
17	crtE	minus	ADC63475.1	Alvin_2565	RC 2893910..2894779	289	geranylgeranyl pyrophosphate synthetase	MDATTRIEQALAAAIDTVAVPGCPPRLAEAVRHAVFPGGARVRP RLCLAVAAACGSRDYAAADAAGVAIELLHCASLVHDDLPCFDDSPLRRGVPSVHRAFG EPLAVLAGDALIILAFEHLARVLADSPERLAPLLLTISRSVGMPHGITAGQAWECEPQ VTVEEYHRAKTGSLFTAATAAGALVAGADAEAWSVVGDKIGEAYQVADDLRDVAASAQ EVGKPVGRDAVLNRPSAAGELGIDGAIARLRGLVTGAIDAIPACPGRDQFAEVLMAES RRIMPKDLAQRAA	x
16	crtD	plus	ADC63476.1	Alvin_2566	2894906..2896402	498	phytoene desaturase family protein	MPDKQVIVIGAGVGGLVTAIQLAARGLQVRVLERAEAPGGKMRE VAVGPHRIDAGPTVFTMRWIFEDIFEAAGARLDEHLELEPLSIIARHAWSEQERLDLH ADHERSVEAIGDFAGAAEARGYRAFCEQARTIYTTLDPTFIRASRPSLMGLMGRCGLS GLGNLRGVRPYDSLWDMLGTYFKDERLRQLFGRYSTYCGSSPFMAPATLMLIAHVEQE GVWSVVGGMHRVAQALARLAEGLGATIEYGRDVTGIITRSGGVRGVSLADGEQIAADS VVVNADPAALTSGRLGADVRRALPPLAPERRSLSALTWCLSAETEGFPLARHNVFFGR DYASEFKDVFAQGRLPRDGTVYVCAQDRGTDGNGSPDGPERLFLLLNAPPRGDRHDFD …	x
15	crtC	plus	ADC63477.1	Alvin_2567	2896099..2897316	405	hydroxyneurosporene dehydrogenase	MRATGILTPGALWPEGPTRPRTDGDDHARGVRTALSGHGRRALW SGDPRLEGVVLASSLAHQDSGTLSGGREHASGRGHSHGGDVGPTGGGSATRGPAFDLT VDNDGYVWWYVDALSDDEQYGLTLIAMLGSVFSPYYAWSRQRGNADPLDHCALNVALY GRRGKRWAMTERGRAALQRDRTNLVIGPSHVHWEGDALVIDIDEISAPIPSRLRGRVR VHPSGINGRDFALDAAGRHRWWPIAPLARVEVDFTNPGLSWKGTGYLDSNRGSEPVER AFQGWDWSRAELKHGAAILYDTRARDDQGAHLALRFDANAEVDEFALPPRAPLPTTSV WRIERGIQCEAGDEPRVVTTLEDTPFYARSVVETRLLGQRATSVHESLCLDRFSTQWV …	x
x	x	minus	ADC63478.1	Alvin_2568	RC 2897384..2897644	86	hypothetical protein	MWLPTPLYETLPYSVVVIGSACIVGAINALMVASGVLLVLCGGV ILKRRHDYRAANRLIEIQRARPPVRRRRSRRVVQLDLEADGL	x
12	crtB	minus	ADC63479.1	Alvin_2569	RC 2897765..2898835	356	phytoene synthase	MPQLSSDHNNTKKTHATAADIAACRELLRCGSRSFYAASFLLPA RFRDPAIALYAFCRIADDAIDCVGDDPVLQAEALEMLNDRLDRLYAGTPIDDPIDRAL ADVVRDFAIPKRLLEALFEGFEWDAEGRRYEDLSGIYDYSARVAGTVGAMMAALMGAR SEEMVARACDLGVAMQITNICRDVGEDARNGRIYLPLSWVREAGVDPDEWLKNPVFNE AIASVVRRLLQTADELYQRSDAGIAGLPLGCRAGINAARYLYAEIGRQVERQGLDSIS QRAVVPAPRKLQLLAPILGRAVVSARPVEAPALEETRFLVEAVVAETPQRTPAGVGER VIWVLELFQQLEERERAALSVR	x
11	crtI	minus	ADC63480.1	Alvin_2570	RC 2898816..2900345	509	phytoene dehydrogenase	MTVAASHVPGSAQGRGQAHAVVIGSGFGGLAAAVRLAARGFRVT VLEKLDAPGGRAYVHRRDGFSFDAGPTIITAPFLLEELWNLGGRRFEDDVDLRLMDPF YRIRFDDGRVFDYSGDADKVKAQIAQYSPADVAGYDRFMAMSEKVFKVGFEDLAHVPF TNLTDMLRIVPDMAMLQSYRTVYGMVSSYIKDPFIRQVLSFHPLLIGGNPFTVTSIYV LISFLERKWGVHSAMGGTGAVVKGLVNLVEGQGTEIRYNAEVERILTRNGKATGVRLA TGEEIAADVVVSDVDPATTYGKLLAEHPRKRWTDGKIERSKFSNGLFVWYFGTKRQYP DVKHHTILLGPRYKELIQDIFKRKTLAEDFSLYLYRPTATDPSLAPEGCDAFYALAPV …	x
07	bchO	minus	ADC63481.1	Alvin_2571	RC 2900430..2901338	302	magnesium-chelatase 30 kDa subunit	MSVYALPNWELDGRDWPNRASSEFVSAGGLRWHVQRMGQGPVLL MLHGTGAATHSWRDFAPILAEHFTLIAPDLPGHGFTSAPPYERMSLPGMAGLIGSLVE TLGVQPDLVLGHSAGAAILIRARLEGRIAPRGLISLNGALLPWRGLPGRLFSPAAKLF ATNSLVSRAFAWRARNRRVIERLVDSTGSTLEPAGVDLYQRLIRHPSHVRASLSMMAN WDLNLIEQSLPSLDTPLFLIVGNQDTTVSPREAHRVRANLRPDAKLFELPGLGHLAHE ERPHEVAEIVCGIGACLGLLQTTENR	x
x	rpoH	minus	ADC63482.1	Alvin_2572	RC 2901439..2902278	279	RNA polymerase, sigma 32 subunit, RpoH	MAKDFSILPTGTIEAYINSAYQIPVLTLEEERSLAVRLRDQNDM EAAKRLVTSHLRFVIRIARGYLGYGLPLPDLIQEGTVGLMKAVRRFEPDMGVRLVSFA VHWIRAEIHEYILRNWRIVKVATTKAQRKLFFNLRSSKKRLGWLTKQEVDEVAADLGV KPEVVLQMESRLSNQDLSFDGLEDDDDDSPAAPSTYLPDVRMEPSRLLEHEDTDRDQR ERLYAALADLDERSKTILFERWLSEKKQTLHELAEKFGVSAERIRQIEKNAMKKVRLQ LEV	x
x	dsbB	plus	ADC63483.1	Alvin_2573	2908284..2908784	166	Disulphide bond formation protein DsbB	MVLKRIERLWLLIGIAGIGIGLASVVLTEWLHLDPCHLCIFQRL LMLVAGVFALVAAGVAWRGANPLPFGGLAMLTTLGGVAVAAHHSWIQAYPSDTNSCVG STPGPIESFIEWLGQQLPALFLATGFCDDDSFRLFGLTLANLSLLLFIVLTSAAFWAL LRARST	x
x	x	plus	ADC63484.1	Alvin_2574	2908844..2909500	218	DSBA oxidoreductase	MPLTRRHFNRLIFGSFALAALPPVAARAALVEGEDWRAITPPQP TDVPGKIEVLEFFSYGCPHCGSLNPLLKQWKSTLPEDVVLRRVPITFGRQAWANLACL FYALESLEALDRLDQAVFTALHEQRVKLYTEPAILEWLGDKEIDIQSFKDAFNSFDVQ TKVGRSDYLAERYQIDAVPTLAVAGRYAVLGHKAQGMPDLLAIADQLIDRARNEGAAG	x
42	pucC2	minus	ADC63485.1	Alvin_2575	RC 2909589..2911031	480	PucC family protein	MSQPIDPRLLAWRELVRRLLPFADVATPDLPMPRLLRLSLFQVS VAIAMVLLTGTLNRVMVVELGVPTWLVATMLALPLIFAPFRALIGHRSDYHHSAFGLR RVPYIWFGSMLQFGGFAIMPFALLLLADASNSLNILGKLGAGLAFLMVGAGLHTTQTA GLALAMDLAPPDKRPRVVALLYVTLLLGMVLSALLFGRLLTDFSQQLLIQLIQGAAVA TIVLNLVALWKQEAVDAVRAANPAKRPPFLETWREFAAGGQASRLLIVVGLGTAGFTM QDILLEPYGGQVLGMTVSQTTALTALWATGTLVAFLLSGYWLGHGGNAYRLTTIGVLC GLLAFSAVIHAASTESVMLFRLGTVLIGFGGGFLAVGTLTAAMDMASADHGGLHSGLA …	x
25	pufA_5	minus	ADC63486.1	Alvin_2576	RC 2911334..2911492	52	antenna complex alpha subunit	MSDVAKPKNPEDDWKIWLVVNPATWLMPIFYALLVLAIAVHAVV FSVGLGWQ	x
24	pufB_5	minus	ADC63487.1	Alvin_2577	RC 2911529..2911669	46	antenna complex, beta subunit	MAEQSLSGLTEQQAKEFHEQFKVTYTAFVGLAALAHLFVIAANP WW	x
25	pufA_4	minus	ADC63488.1	Alvin_2578	RC 2911775..2911981	68	antenna complex, alpha subunit	MAIEFMGYKPLENDYKFWLVVNPATWLIPTLIAVALTAILIHVV AFDLEGQGWHAPAAEAVEAAPAAQ	x
24	pufB_4	minus	ADC63489.1	Alvin_2579	RC 2911998..2912141	47	antenna complex beta subunit	MADMKSLSGLTEQQAKEFHEQFKVTYTAFVGLAALAHLFVIAAN PWW	x
x	x	minus	ADC63490.1	Alvin_2580	RC 2912329..2912790	153	hypothetical protein	MHKSPFVDPNLREELHVKFAAKRTWPDKATTWEHQGEADDVESF ASEFATLEQLAVGAEFVVMCKDEDEQGVRFFRVAATAPCRLEPAEARTASTADAGSEP AAGEDESEPVGLPNLSPVISMIFYMGKVAFIATAGIALMALIITYLRKFLE	x
x	x	plus	ADC63491.1	Alvin_2581	2913025..2914500	491	integral membrane sensor signal transduction histidine kinase	MRLSIHSKVFLTLLLACVVVLAGSHAFVQWSFQRGLVEFADARE QERIARVIERLSDIHQREGSWRSLIEDRRLWFYALNGRRDPWREPRPERQERGPHWMR EVGADPRAWPPQGWLDRLRQHERPAPLELRLMLLDAQGDILYGRTELLANTRRYPVEV DGRRIGELALLPGSPVPESAELRFRATLGDRLWIIALAMLLLAAALAYPLSSRLVRPV RDFQDVARRLAAGDFSARVPAHGGDELARLGQDINALAAALERNEQARRRWAADISHE LRTPIALLRAELEALQDGVRPFDRDALDALHGDILRLGRLIDDLYELTTTDMGALGYR FAACDVAEILGADIDAFERTFQEAGLTLEFDDALREPILIQADAQRLSQLFRNLLGNS …	x
x	x	plus	ADC63492.1	Alvin_2582	2913025..2913105	233	two component transcriptional regulator, winged helix family	MSTTETAHILIVEDEERLARLVADYLRAAGHRVQHLAEGTGVAA WVRRERPDLILLDLMLPGKDGLDICREIRTESQVPIIMTTARVEEIDRLLGLELGADD YVCKPYSPRELVARVKAVLRRTLAPEPPAADPGPLHLHRDELRVRAGDDEIELTAVEF ALLETLHGAPGRIFSRDRLMDRIYRDHRVVSDRTIDSHVKKLRRKLAELVPDQELIHS VYGVGYRYETPADSD	x
									x
		minus	ADC63539.1	Alvin_2630	RC 2973367..2974644	425	stress protein	MGLELQQGANAPLVQNRILVGIGWDAGVSWDIDACAFLIGSTGQ VRHDQDFVFYNQAETPCGSLILESEPDDDQRRFRAFLDRVPEDVTKIIFTVTLATEPD VEGCPHCGLLDQLYIRLTDLAGEDELIRFDLKPAGRERALMLGDLYRHQGTWKFRAVG QGYNGGLDTLATALGVNLQSSTAEETEASEDDRNNPPVTLSRRRSPKQVRAEKAEALQ KALRRFLPQIRAAVDNQLNESNTRMILDKILMDVLGYSMDEIKAEQKVQGRKADYVLA VGDQDLIVGESKRAGLTLRDKHVFQSTSYGAYSGIRWALLTNLATWRVYHIATHDMVT ANLVFSVDLLPDVSLEDCERLLLISRFGMTRKGMLEKHWNEVSALTRESLIRALLTED …	x
		minus	ADC63540.1	Alvin_2631	RC 2974754..2976115	453	AMP-dependent synthetase and ligase	MNDPGLVLITDGDRLEADAFAHQVAERAVAFMECGLRPGQVVMA PDSPALDLTLTMLALGRIGAGLFPYRSGLDPTERLALAKLAGVEWLWNPDSTGLVPLS DATQTTHVSPESRAALLIKTSGSSGHPQIVMHGYAGLRASASRVNARLGVTAESTWLC CLRLSHIGGAAILYRAARAGARLRLHDGFDAPTVRRELEAHGVTHVSLVPPMLARLLD LGGRAPPSLRVVLVGGQALSRPLAERALAAGWPIRLTYGMTETGSQIATSGPLAVDDG ELDTSLVGTLLPDVDVEAPGCDASPERLRIRGPMLMLGYANPERRPGQGLEEGGWFAP ADLGCLTDTEQLRILGRTDDRRVIGGTNVSLTKVAQVVQEAPGVSEVQIVAGLDPVWG …	x
51	bchJ	minus	ADC63541.1	Alvin_2632	RC 2976148..2976747	199	bacteriochlorophyll 4-vinyl reductase	MSQTDNHGRIGPNAIIRVFEALNEQRGRTVAEAVFQRAGLGGYL DALPEAMVPEEEVIALQQALRDELGIAEAREIARDAGRRTGDYLLARRIPRPAQALLK ILPAKLASRTLLKAISGNAWTFVGTGHFAVTSESPPRIEITHSPLCRGTMADEPLCDF YAGTFERLFRVLVHPDTVFTETACQAMGDPSCLFEGRWS	x
x	x	minus	ADC63542.1	Alvin_2633	RC 2976744..2978030	428	oxygen-independent coproporphyrinogen III oxidase	MSSLGSAGDKPFTQTQYLDVLDTLRQAPDGNLALYIHVPFCHVR CLYCACDTTVTHSLEKVDQYLDALEREMDMVTERIGRRRPIQQLHVGGGTPNHLNEPQ LARLMEIVESHFELAPESCASIECNPRRASVGQLELIHGLGFERISFGVQDLNLDVQR AIGRVQSLNMVRDVFLTARQTGFESINLDLVYGLPFQTPRGFQATLDQVLDLGPDRVA CFSYAHDPARRPHQHAINTAHLPTPAEKLALFHRAVRTFTEAGYRWVGLDLFVLEDDE LYEAQVDGRLYRNSLGYTTSADRQVLAFGPSGTAELADALIRNESDLRVWQMRLNNGQ FPVAWGRRLDEADRRRRQALLHLMCNLQLPASSAADLDHEYEQLCRKAEQGLVEISEE …	x
48	puhE	minus	ADC63543.1	Alvin_2634	RC 2978469..2979299	276	photosynthetic complex assembly protein	MADYGFPLLFALGLWWFSTGVVLYLDNLPGRTFRWTLMGGSVVL AIAIFVLIVSSASTSVAGAYVAFTAGVVIWGVIEMSYFTGLITGPRKTACPPGCSKWR RFGLAILTSLYHELLILGTVLFMVLATWGEPNKVGTWTFIVLWIMRWSAKLNLFLGVP NLNEDWLPEPLRYLKTYMVKRAMNLLFPVSVTLATIVDVLIVLEALSPEVTGADAVGL ILVASLLGLAILEHWLLVLPLPDEALWAWALPPHQDQTEHPSTTENDAMTHQRVVASP	x
x	x	minus	ADC63544.1	Alvin_2635	RC 2979428..2979886	152	photosynthetic complex assembly protein	MSDAFEGRTFPKGVLIAVGALLGFTIVMIAFARLTGYMMPQAPF LAEVESRDIRFVEQTDGSMAVRDGASGELIQTLPPGGEGFVRGMLRSMERQRKGFKAD ISEPFHLARREDGMLTLEDPITGIRLDLRAYGVDNEASFAVFLPSAPVQR	x
44	puhB	minus	ADC63545.1	Alvin_2636	RC 2979899..2980558	219	PH domain-containing protein	MREYDVEPIPGLPERLPPGEEVLWQGSPSWKSLARRAFHVREVA IYFGVLAVLAVLVDASDGLTLASLVQGLTWILLLAAVSIGALTWLGWSMARSSLYTIT NRRVVMRIGAALPMMMNLPFKQVRSADLRVYEDGTGDIPLLLDQSAKPSYMIFWPHVR PWHFAPVQPMLRTIPDAAKVAGILAEALQDYLESEATARVSGTEAMDDAALASATETL S	x
43	puhA	minus	ADC63546.1	Alvin_2637	RC 2980555..2981334	259	photosynthetic reaction center, subunit H	MSAAITEYMDVAQLTIWAFWFFFAGLIIYLRREDKREGYPLDSD RTERSGGRVKVVGFPDLAEPKTFVLPHNAGTVMAPRVEAPTSINATPVAPFPGAPFEP NGDPMLSGFGPSASPDRAKHCDLTFEGLPKIVPLRVATDFSIAERDPDPRGMTVVGLD GEVAGTVSDVWVDRSEPQIRYLEVKVAAGGKNVLLPIGFSRFDKKARKVKVAAIKAAH FANVPTLAKPDQITLYEEDKVCAYYAGGKLYATAERAGPLL	x
41	bchM	minus	ADC63547.1	Alvin_2638	RC 2981569..2982270	233	magnesium protoporphyrin IX methyltransferase	MSDASYQERRGKIETYFDRTAADAWSKLTSDAKVSRIRETVRAG RDDMRQTLLSWLPQDLTGKRLLDAGCGTGMLAVEAARRGAEVVAIDVAPTLIEIARER LPSDLGAGSVDFQAGDMLDPAHGRFDHVVAMDSLIHYRPEDVVKVLAGLAARTSGSIV FTFAPRTIPLTIMHAVGQLFPRSDRSPAIEPVSEAKLRGLIGAESGLSGWRPERTRRI AVGFYMSQGLELLPR	x
40	bchL	minus	ADC63548.1	Alvin_2639	RC 2982270..2983175	301	ferredoxin:protochlorophyllide reductase (ATP-dependent), iron-sulfur ATP-binding protein	MQASSSGFHLSSHPDGEGSVQVQLDPDMQIEGAKVFAVYGKGGI GKSTTSSNLSVAFSKLGKRVLQIGCDPKHDSTFTLTKCLVPTVIDILESVNFHAEELR PSDYVYEGYNGVMCVEAGGPPAGTGCGGYVVGQTVKLLKQHHLLEDTDVVVFDVLGDV VCGGFAAPLQHAERALIVTANDFDSIFAMNRIAAAIKAKSKHYKVRLGGVIANRSRNT DEIDRFAEAVGLKRLAHLPDLDIIRRSRLKKSTVFEMEPEPGSGLEAAQQQYLQLAQQ LLDGVEPLEARPMADRDIFDFLGFN	x
39	bchH	minus	ADC63549.1	Alvin_2640	RC 2983178..2986912	1244	magnesium chelatase subunit H	MPKRTSAADQTRSNATPVRVVIVNLDGHLAGTTQRALPQVQRDL PGLQLRLHAATEWADDPASLERCKQDIAEGDIIMVTMLVMEEHFKPILPALSARRDHC DAMIVCMSASELMKMTRMGGFSMDGSSSGGPMALLKKLRGNKERQQSAGAQQMSMLRR IPKLLRFIPGTAQDVRAYFLTLQYWLAGSDENLGNMIRFLVDRYAGGERAHLRGSLKV ASPVEYPEVGLYHPRMKGRISDKLAQLPGIQDAKKGRVGLLLMRSYVLASNTGHYDGV IQALEARGLHVVPAFASGLDARPAIEKFFMQDGIATVDAVVSLTGFSLVGGPAYNDSN AAEEILKRLDVPYLATLAVEFQTLDQWQESAQGLLPVEATMMVAIPELDGAAGSLVYG …	x
38	bchB	minus	ADC63550.1	Alvin_2641	RC 2986887..2988467	526	ferredoxin:protochlorophyllide reductase (ATP-dependent), subunit B	MQLTLWSYEGPPHVGAMRIAASMKGVHLILHAPQGDTYADLLFT MIERRASRPPVSYTSFQARDLGRDTAELFKTTVEAAYERFKPELILIGESCTAELIQD QPGALAQGMGLPVPVLPLELPAYTRKENWGANETFYQMVRGLLKSRVPAPGTERELRA QGARPKANLLGPTSLGYRCRDDILEVTRLLDSIGIDVNLVAPLGATPADLLRIPEADF NVCLYPEVADQACDWLRRSFGQPVVKTVPIGIGATREFLQEAARAAGLEVDTTHEPIS SRMPWYSRSVDSTYLTGKRVFIFGDATHAVAAARIAAEELGFTVVGLGTYAREFAREV REAAKRYGVEPLITDDYLEVEAKVAELHPELVLGTQMERHIAKRLGVPCAVISAPVHI …	x
37	bchN	minus	ADC63551.1	Alvin_2642	RC 2988472..2989716	414	ferredoxin:protochlorophyllide reductase (ATP-dependent), subunit N	MSAPEIRCEQGQRQVFCGLSGIVWLHRKIQDAFFLVVGSRTCAH LLQSAAGVMIFAEPRFATAILQERDLAGLADCNQELDRVAAEVLERRPDIKTLFLVGS CPSEVIKLDLGKAAERLSEVYRGRVRVLDYSASGLETAFTQGEDACLQALLPELPTRP AGERSLLIVGTLPDVVEDQFKRLFDELGIGPVEFLPPRHATEYPSVGNGTLMLLAQPF VGETARALQKRGATLLTAPYPFGIEGTRAWLKAATDAWGIPAERLEAVTAPAIARAEK GLARQRELLAGKRICFLPDSQLEIPMARFLQRECGMELVEVATPFLDRQLMEAELPLL PPDLHLTEGQDVDRQLDRVRAARPDLTVCGLGLANPLEAEGLRTKWSIELVFTPVHGF …	x
36	bchF	minus	ADC63552.1	Alvin_2643	RC 2989713..2990231	172	2-vinyl bacteriochlorophyllide hydratase	MTQHSASQPPRRPLYTPEERRRRDESSWTLVQGILAPVQFVVFL ISLYLVLRYLATGEGYLAATISVIVKTLVLYTIMITGSIWEKVVFGKYLFAEAFFWED VFSMLVLALHTAYLIAIFTLDSQTQMFIALAAYATYIINAGQFLIKLRMARLEGQRKD SAQDGALAGAAE	x
34	ppsR	plus	ADC63553.1	Alvin_2644	2990675..2992114	479	transcriptional regulator PpsR	MAVSPFRAPTESLGTLDAATAAALIEGLADVAVVLDTAGIVQDV SFGSEDLRTDVDADWIGQPWLATVSLDTRPNLEALLDEVQRVTVTRWRQVTHLGARGT EIPVQYRALRLKGDDGPIIAVGRNLQGMAALQQQLIDAQQALERDYWRFRQVETRYRL LFRMVSEAILIIDAPTQRVVEANPAAGQLLGEAPARIIGRPFPEGFDTEGTQAINGLL AGVRAAGRADDVRARLIDGTEEFLVAASLLRQENASFLLVRLSPVLAESASSAPPDAK ARYLRVLEDAPDGVVITDADGRILSANATFLSLAELPTEQQARGESLDRWLGRPGVDL SVLMANLRQYTTVRLFATLLRGEYGTTTDVEISAAAVRNGERPYFGFFIRDVGRRLHS …	x
33	bchG	plus	ADC63554.1	Alvin_2645	2992229..2993179	316	bacteriochlorophyll synthase 33 kDa chain	MDQTAPKTGFPRMNQTTVIATRTYPEPKAILEVLHPITWFPPMW AFTCGVVSSGAPILEQWWLLIAGIILAGPLMCATSQVVNDWYDRDVDAINEPDRPIPS GRIPGRWGFYLSLIWTVVSLALAYALGPWVFGMALIGMAISWGYSAPPFRFKGNGWWG NLAAGISYEGLAWVTGAAVMIGGALPGWEILVLALLYSLGAHGIMTLNDFKAIEGDIQ MGVRSLPVQLGVEKAAWWACGVMGLPQAVVVALLFSWDKPAHAIAVGVVLLIQVALMV RFLARPVERAVWFSGLGVTVYVTGMMISAFAVRGLMTAAG	x
31	bchP	plus	ADC63555.1	Alvin_2646	2993278..2994468	396	geranylgeranyl diphosphate reductase	MSNLETFDVVVIGGGPAGATAANDLAKAGRSVCLLDRAGRIKPC GGAIPPQAMRDFDLPESVLANRVSSARMISPSDRKVDMPIQNGYVGLVDREHFDEWLR ARAAESGATRRTGTFEKIERDTDGTAIVVYRPGQGRNDSPSEQIRARAVIGADGANSF VGKHYVPGYETVKYVSAYHEILRTPPGFDGSRCDVYYQGDISPDFYGWVFPHGDTISV GVGTAVPGFSLRAACTELSRRAGLGDAEILRREGAPIPLEPLKCWDNGRDILLAGDAA GVVAPASGEGIYYAMMGGRLAAQAVDEFCRTGDPKALKQARKRFMKDHGKVFWVLGIM QRFWYSSDKRRERFVSLCADPDIQYLTWEAYMNKRLVKARPGAHLRIFFKDMAHLLGL …	x
x	x	plus	ADC63556.1	Alvin_2647	2994465..2994752	95	conserved hypothetical protein	MSDLFASGRIIDLILVLIVVEGLVLALVHRRTGRGLPPSDLIGF LLSGFLLMLALRAALVGAWWGWISLALTGSLITHLADLLWRWRRAGRRPPG	x
x	x	plus	ADC63557.1	Alvin_2648	2994812..2994888	721	von Willebrand factor type A	MPWKTEHRERSFAHTFAFGSLLAASCVLWMPAAQADLSELEGDH GHPSQTTGTPSTPPAQPIDDGLSCPGDSPCIETATQLTLRVLPRPFSNIYQEPVADGG AIVQANPPAFRPLYAFERRDIDLREGAEPRGWYRVGRTRTQADGWMQAKDVFEWRQAL LVSFTHPGDPIEGRHPVLMFKDRETLQAIVDDMDMAASAQALYDEIDRGGTPEAVISL EPKRFVDITTHFYMLPILQWSQTQIDGDDVRLLQLASAVPGARGADTLQTPEYREQAQ TGRDTADQGIEDIAVDIVFVIDTTRSMQPFIDMTRDAVARMARNFSERTQDRFRFGLV TYRDSLEAVPALDYLTRNHTPTLVTAERLAEILDTDAKATRVGSLGYDEDVFAGVDAA …	x
									x
Photosynthesis genes (unclustered) - Allochromatium vinosum DSM 180
No	Gene	Strand	Accession	Locus Tag	Range (original)	Size (AA)	Protein
x	x	minus	ADC62119.1	Alvin_1180	RC 1367331..1368272				x
x	x	minus	ADC62120.1	Alvin_1181	RC 1368269..1369540	423	coenzyme F420 hydrogenase/dehydrogenase beta subunit domain protein	MNDAVLDPQDTGPSKGLATISLLSSDERLKGRPKLCSDCGLCDS TLKGRMSSACIFVRNQTAEIEQRLHGRARRPDDERRFGIHRTQYAARMRRPNPQAQWS GIVTSLGARLLEQGRVEAVITTGAAPGTRFKSEPVLARTPAEVLATAGNKPCLSPNLR LLDQVREQGIKRLAFIGTSCQVHMLRAVEAELGLEKLYVIGIPCSDNVTYPDLEYFLT QVSRSPQTIVHYEFMQDFSLWMRHEDGHKERVNYIDFPMDKLHGIFPSSCLSCFDYPN TLCDLTVGYMGAELGWQWVLARTEIGEELFELIRPDLEIGELTSSGDRTRGMPHYIAR LTQPPGAKKPPFLVRKLVAYMQRKKGSKGLEFARAIIEMKLLRNLNYVRSKFPRFEAR …	x
05	bchI	plus	ADC62121.1	Alvin_1182	1369846..1370874	342	magnesium-chelatase 38 kDa subunit	MPIPFPFSAVVAQEEMKRSLLMAAIDPSIGGVLVFGDRGTGKST AIRGLAALLPKMRAVDCTYNCDPEAGDDYLCQECRTKKAEKGSLKSRQVPVPVVDLPL GATEDRVIGALDLERALTKGEKAFEPGLLARAHRGFLYIDEVNLLEDHLVDSLLDVAA SGQNLVEREGLSVRHPARFVLVGSGNPEEGELRPQLQDRFGLSVEVKTPTDLPTRMKV VRLRDEFERDPEAFVEKWKAKDAKVSRQIQKAKKLLPEVEVPDRTLEETAKLCIKLGT DGLRGELTVIRSARALAALQGDKTVTVDHVKTIAVSALRHRLRRDPLDESGSTSRVER AIKELFGE	x
06	bchD	plus	ADC62122.1	Alvin_1183	1370871..1372691	606	magnesium-chelatase 60 kDa subunit	MSTPGPNPAVADGGTPAPLQAGPGHSPWDDAVLAAVLMTIDPVG TGGVALRALPGPVRDQWLSIMRDLQPEGTPMRRIPLHVADGRLLGGLDLAATLNAGRP VAEKGLLVEADGGVVELAMAERIAPGTAARLNMAFDSGEVVLERDGLAMRTPSRFAVV ALDEGVGEDEGLLNALLDRLAFHLELNYVRYDQAIACNYDVEDVLAARPRLPGVTITD TQVETLCNIALALGIPSLRASIFASRVACAHAALEERTEVTDEDLAVAGRLVLAPRAT QLPPMEPPPDAEPPPPEPEEPNQDEEQSNQEPQEPQELQDKILDATKAAIPAGLLAQL QMGKLRRSRARATGKAGAVQNAPSRGRPAGVLRGEPRAGQRLNVIETLRSAAPWQRIR …	x
x	x	plus	ADC62123.1	Alvin_1184	1372952..1374268	438	transcriptional regulator, Fis family	MSRPLALVVDDEADILDLIRITLGRMNVSAVTALTVAEAKLQLE RHRPDLCLTDLSLPDGTGLDLLHHINTHHPDLPVAMITAHGNMESAVAAMKAGAFDFV AKPVDLSALRNLVESALRLRGRATPTEERTDSEPPLLGDSPAMQQIRALIAKLARTQA PVFITGESGTGKELAARLIHAQGPRRDGPFVPVNCGAIPHDLVESELFGHKKGSFSGA LADKDGLFQAAAGGTLFLDELADLPLPAQVKLLRAIQEKCVRPVGAAREVPVDVRIIS ASHRDLAQEVEKGRFRQDLFYRINVIELRLPALRERPEDIRPLAVHILRKLARAASEP TAVEPWLSEEAGAALMRYAFPGNVRELENILERAVALCEGERIEVGDLYLPVNERAGA …	x
x	x	plus	ADC62124.1	Alvin_1185	1374400..1374642	80	resolvase domain protein	MAALTIRNLDESIKSAIRVRAAQHGISMEEEARRLLREAVSRSS SPVPMGQCLLARFGETATEDFSVPERHRPRVAPEWD	x
									x
									x
									x
x	x	plus	ADC61394.1	Alvin_0435	501238..503916	892	multi-sensor hybrid histidine kinase	MPNDLPDLDQCASEPIHLAGAIQPHGVLLALHESPWRIVQATAN CKDRLGIAPAALLERELDSVLGVELLTAAQAGLATYREQPSAPVSFAWCSPLDGVAFT GYVHESEALVILELEPVPSPPGASDDLLARAVRGLVGVRAQADLPLKLQQAATLLRDL TGYDRVMVYRFDPVDWHGEVVAEARRPDLEPYLGLHYPASDIPDQARRLYLINRTRAI VDIDYVPVPIEPEPNPITGRPLDLSRSLLRSVSPVHVEYLRNMGVRATLTLSLFHDDR LWGLIACHHLSPYWVSDEIRRVMDWMAQDLETQIQVAEDRRRRLYEQHLKTCRERVMA AMRQGVRLQNLLTGAHQADLLGAVGAEGMALIAGSQVYTAGTTPEAERISQLAVDLRR …	x
x	x	minus	ADC61395.1	Alvin_0436	RC 503907..504683	258	hydroxyacylglutathione hydrolase	MLAVQPIPAFEDNYIWLLTEGGGNAVVVDPGDAEPVLERLSAEH LTLTAVLITHHHYDHTGGLDELLAAFPGLEINGPDDDRIRALTHRRREGETFVPAGLT TPFQVLEVPGHTSSHIAYLGAGRLFCGDTLFAAGCGRVFDGTFEQLAHSLERIAALPV DTLCYCAHEYTQANLGFAEWVEPDSPALAERVRQTQLQRARGQPTVPSRLDLERATNP FLRTREPKVIAAAERQAGHRMATSAEVFTALRRWKDERYD	x
29	dxs1	minus	ADC61396.1	Alvin_0437	RC 504688..506592	634	1-deoxy-D-xylulose-5-phosphate synthase	MPHRTLTDSGVGAHRRPLLDSIDSPADLRALSESQLPELASELR SFLIECVSKTGGHLAAGLGVVELTLGLHYVFDTPHDRLVWDVGHQAYPHKILTGRRDR MCTLRQKDGISGFPKRGESEYDTFGVGHSSTSISAALGMALAAKQRGERRTVIAIIGD GALGAGMAFEALNHAGSMDIDLVVILNDNEMSISPPVGAISNHLARLLSGKLYTSVRE GSKHALAGMPQLRHLVGRWEEHMKGMLMPSTLFEELGFNYIGPVDGHDMDGLLRTLRN IKDMPGQRLLHIVTKKGRGFEPAEGQPVIYHGVTPFDRQTGQLLKAKGAGPTYTQIFG GWLHDTAAADPRLVGITPAMCEGSGLTAFSKRFPERYFDVGIAEQHAVTLAAGLACEG …	x
x	x	plus	ADC61397.1	Alvin_0438	506767..508152	461	cysteinyl-tRNA synthetase	MLQIHNSLTRQKAPFQPIEPGKVRMYVCGMTVYDYCHLGHARVL VVFDVVYRYLRALGYDVTYIRNITDIDDKIIRRANENGEPFQALTERFIQAMREDSEA LGVLPPTDEPRATAHIGEILAMVQTLIDKGLAYVADNGDVYYAVSRFPDYGKLSGKDP ADLRAGSRVEIGESKRDPLDFALWKAAKPGEPAWDSPWGPGRPGWHIECSAMSTCCLG NHFDIHGGGADLQFPHHENEIAQSEGATGEPFVNVWMHNGFVRVNEEKMSKSLGNFFT VREILRLYRPEEVRYFILTSHYRSPLNYDDSALQKARAALTRLYTALRGLPEAAPAEG EAFRARFQAAMDDDFNTPEALAVLFELAREINRLRSDGSDQAAAHGALLRELGAALGL …	x
x	x	plus	ADC61398.1	Alvin_0439	508363..508746127	127	transmembrane region and signal peptide prediction	MNKNLSRFAAVGLPLILVALTGCNRSPEVSFAQDVQPILKKHCV ECHLPNGQGHTASGFLVESYDTLMKGTKFGPVVVPGDALSSSLYRLVAGEVDASIRMP HGKDPLPAAEIAVVENWIAQGAKNN	x
									x
x	kaiC	minus	ADC61651.1	Alvin_0702	RC_818578..820041	487	circadian clock protein, KaiC	MPVASQAPHVDLPRIAKCPTGVRGLDEITEGGLPRGRPTLICGA AGCGKTLLAMEFIVRGAREFDEPGVFMAFEETEGELIENVGSLGFALDALVDQGRVAL DYVYLERSEIEETGDYGLDGLFVRLGSMIEETGARRVALDGIEALFAALPSEGILRAE LRRLFRWLKEQGVTAVITGEQGEKTLTRHGLEEYVSDCVLFLDHRVHGQVATRRLRVV KYRGSRHGTNEYPALIDEHGLSVLPISSVTLEHRVSRERISTGVPTLDAMLGGRGYFK GSSILISGTAGAGKSSLAVAFADSLCRRGERCLYWASEESSDQILRNMGSIGFDLEPH FAGGRLHCHAVRPTLHGLESHLMSLHKLVETWRPQALILDPITNFTTIGDPSEVKLML …	x
x	x	minus	ADC61652.1	Alvin_0703	RC_820285..820446	53	hypothetical protein	MSDINKPSNPADDWKIWLVVNPSTWLMPILFAVLAIVLTVHITV LQLGWFTWG	x
24	pufB	minus	ADC61653.1	Alvin_0704	RC_820475..820600	41	antenna complex alpha/beta subunit	MNGLTEQQAKEFHAQFKVTYTAFVGLAALAHLMVLANNPWF	x
61	pucA	minus	ADC61654.1	Alvin_0705	RC_820698..820907	69	light-harvesting protein B-800/850, alpha chain	MNIEFMGYKPLEQDHRFWMVVNPATWLMPILIAVALVAVLVHFY AFSLPGQGFSAAPAEAAPAAAAPAE	x
60	pucB	minus	ADC61655.1	Alvin_0706	RC_820925..821071	48	light-harvesting protein B-800/850, beta chain	MAEQQKSLSGLTEQQAKEFHEQFKVTYTAFVGLAALAHMMVIAA NPWW	x
x	luxR	minus	ADC61656.1	Alvin_0707	RC_821239..821787	182	regulatory protein LuxR	MKAPLFVRPLSLKELQILRGGLHSLDAFTQRRCQILLASAEGRT ATHIATSLGCAQQTVLNALNAFATDGLGCLIAKSHRPKNTRALIGGFSAEQIRSMLRR CPSEFGKARGRWTLAVLARVAFEQGLTDREVSEETIRQVVKRLGMDWKEARQGAGAPS HRAGFQRSGSNAYGDCKIHLTF	x
x	x	minus	ADC61657.1	Alvin_0708	RC_821939..822097	52	hypothetical protein	MEVMGYKPQEQDYRFWLVVNPATWLMPILFAVLLIVLTVHVAVL SLGWFTWG	x
									x
									x
									x
PGC proteins of Rhodobacterales without homologs in Allochromatium vinosum DSM 180
No	Gene	Strand	Accession	Locus Tag	Range (original)	Size (AA)	Protein
32	pucC1	x	x	x	x	x	PucC family protein
47	acsF	x	x	x	x	x	magnesium-protoporphyrin IX monomethyl ester aerobic oxidative cyclase
04	crtA	x	x	x	x	x	spheroidene monooxygenase
13	crtK	x	x	x	x	x	CrtK protein
49	hemA	x	x	x	x	x	5-aminolevulinic acid synthase
23	pufQ	x	x	x	x	x	protein pufQ
35	ppaA	x	x	x	x	x	regulatory protein Ppa
45	puhC	x	x	x	x	x	photosynthetic complex assembly protein		x
46	PS gene	x	x	x	x	x	hypothetical protein
50	cycA	x	x	x	x	x	cytochrome c-551
62	pucC3	x	x	x	x	x	light-harvesting complex assembly protein PucC		x
63	pucDE	x	x	x	x	x	light-harvesting protein B-800/850, gamma chain
Marker proteins of the Calvin cycle in Allochromatium vinosum DSM 180
x	x	plus	ADC61510.1	Alvin_0560	645323..645922	199	hypothetical protein	MASQAVRASIQGQPFNDVLNELHAHTFSGAPGESDPFTLSELDR EFIAYALAIYYQCDHCQQYHGRVIERLFKESDAKPWAWQAEFVKIVLFLRTSRQSVSE VEWQGWVEAWRRFATRLHYRHPGFACNIAYAIGISRADENLMELAFESLTRHYPDGET LLGVIRDIDRVVVFMKAATSKNRTDPIVRRQLKTCGVHI	x
x	x	plus	ADC61511.1	Alvin_0561	646063..647925	620	ATP-dependent DNA helicase RecQ	MGESAREILSRIFGYDRFRGAQAEIIEHLIGGGDALVLMPTGGG KSLCYQIPALIRPGTAIVVSPLIALMQDQVEALRQLGVRAAFLNSSLDLDEARAVERA LRNGTLDLLYVAPERLLTERCLSLLDSIEIALFAIDEAHCVSQWGHDFRPEYIQLEQL HARWPQVPRIALTATADAPTRNEIVARLRLESARRFVSSFDRPNIRYRIVEKTNPRRQ LLDFLRREHPESAGIVYCLSRRRVEETAVYLESEGFRALPYHAGLPSEMRREHQARFL REDGLIMVATIAFGMGIDKPDVRFVAHLDLPKSLESYYQETGRAGRDGLPADAWMAYG LSDLVTLRRLIEESEAEERFKRIELHKLDAMLGLCETTNCRRQVLLNYFGEPLEQPCG …	x
x	prk	minus	ADC61512.1	Alvin_0562	RC 647983..648873	296	phosphoribulokinase	MSKKHPIVAVTGSSGAGTTTVKRAFEHIFHRDNISAAVIEGDSF HSYDRATMKAEMAAFAKRGESLSHFGPVANRFDLLEELFREYGETGCGKKRYYIHSDE EARQLNARLGTSLNPGEFTPWEDLPAGTDLLFYEGLHGLVVTEDSNVAQHVDLGVGVV PIVNLEWIQKIHRDNLERGYSAEAIVDTIMRRMPDYIRYITPQFSLTDINFQRVPTVD TSNPFIARDIPTPDESFVIIRFKDPKKLQIDFPYLLSMIHDSFMSRRNSMVVPGGKMG FAMEIILQPIIERMMDARRV	x
x	x	minus	ADC61513.1	Alvin_0563	RC 649071..650750	559	diguanylate cyclase	MPPESDHAHASPAGPDSGRPGPIRRRFGLRAHLALVLLTVALLP LLTLYWAERHQIQAEALELTHQTLNLIADVQQRRINLELRRLEDLTRLVSSRTQMRLS LAAYARDGDPKHLELIARSLADAVGSTPDLRGIWIRDPSGRTLTQATRDGTLANAIDM AGLPRQAPAPILFRRFETQKPEIWLNGPLVLNESVIGSVHLLVRMENILALLEDFDNQ YPGGETVLLLCSGTPETFAWSARAGVWNPETAASDPLNDLLRNLAQDADPARTSIVPS TATHGSLIYTLRALALDCFRLLVHTSPDKITRSARKHIMLLVYITFSLILLALGAAVI LAHVIANPIHAITNGMYRLSQGDYHTRIPEQGWGELSRLTLAFNETAASLQRAIQARL …	x
x	x	minus	ADC61514.1	Alvin_0564	RC 650900..651598	232	electron transport complex, RnfABCDGE type, E subunit	MSTPQSYGSILSGGVWSNNQMLVALLGLCPLLATTTSATNGLGM GLATLVVIVCSNGTVSLVRNLVRPEIRIPVFVLVIASFVTLVELIMQAFFYDLYQVLG LFISLIVVNCMIIGRAEAFASKNRVDRALFDGLAVGLGATLVLTTLGGLREFVGQGTL FHQADLLLGDWAKAISLSLGEDFQGALIAILPPGAFIGLGLMIALKNLIDQRAKRRAA ARAVPAVRTDPSPA	x
									x
									x
									x
									x
									x
									x
									x
									x
									x
									x
									x
									x
									x
									x

## Sheet: Table S6E PGC-Congregibacter
Table S6E: Photosynthesis gene cluster of Congregibacter litoralis DSM 17192 (T)
Order of genes in the PGC and localization on the plus and minus strand. The color code and numbering of proteins is corresponding to those of Dinoroseobacter shibae DSM 16493 (Brinkmann et al. 2018). Protein accession numbers are highlighted in blue, corresponding locus tags are shown in black.
Photosynthesis Gene Cluster (PGC) - Congregibacter litoralis DSM 17192 (Chromosome; 4,351,117 bp [NZ_CM002299.1]). The PGC is shown in inverted orientation in comparison to Fuchs et al. (2007).
No	Gene	Strand	Accession	Locus Tag	Range	Size (AA)	Protein		Comment
x	sfsA	minus	WP_008296347.1	KT71_RS06005	RC_1294310..1295119	269	DNA/RNA nuclease SfsA
x	x	plus	WP_008296345.1	KT71_RS06010	1295225..1295605	126	rhodanese-like domain-containing protein
51	bchJ	minus	WP_008296344.1	KT71_RS06015	RC_1295608..1296213	201	bacteriochlorophyll 4-vinyl reductase
52	bchE	minus	WP_008296343.1	KT71_RS06020	RC_1296213..1297904	563	magnesium-protoporphyrin IX monomethyl ester anaerobic oxidative cyclase
x	x	plus	WP_023660410.1	KT71_RS06025	1298022..1298894	290	alpha/beta hydrolase
05	bchI	plus	WP_008296341.1	KT71_RS06030	1299026..1300045	339	magnesium-chelatase 38 kDa subunit
06	bchD	plus	WP_008296340.1	KT71_RS06035	1300042..1301889	615	magnesium-chelatase 60 kDa subunit
07	bchO	plus	WP_008296339.1	KT71_RS06040	1301894..1302754	286	magnesium-chelatase 30 kDa subunit
11	crtI	plus	WP_008296338.1	KT71_RS06045	1302844..1304370	508	phytoene dehydrogenase
12	crtB	plus	WP_023660411.1	KT71_RS06050	1304351..1305478	375	phytoene synthase
15	crtC	minus	WP_008296336.1	KT71_RS06055	RC_1305456..1306478	340	hydroxyneurosporene dehydrogenase
17	crtE	plus	WP_008296335.1	KT71_RS06060	1306582..1307454	290	geranylgeranyl pyrophosphate synthetase
18	crtF	plus	WP_008296334.1	KT71_RS06065	1307511..1308620	369	hydroxyneurosporene methyltransferase
19	bchC	plus	WP_008296333.1	KT71_RS06070	1308734..1309687	317	2-desacetyl-2-hydroxyethyl bacteriochlorophyllide A dehydrogenase
20	bchX	plus	WP_008296332.1	KT71_RS06075	1309687..1310667	326	chlorophyllide a reductase iron protein subunit X
21	bchY	plus	WP_008296331.1	KT71_RS06080	1310660..1312129	489	chlorophyllide a reductase subunit Y
22	bchZ	plus	WP_008296330.1	KT71_RS06085	1312129..1313604	491	chlorophyllide a reductase subunit Z
x	x	plus	WP_023660412.1	KT71_RS06090	1313660..1313896	78	hypothetical protein
26	pufL	plus	WP_023660413.1	KT71_RS06095	1313984..1314811	275	photosynthetic reaction center, subunit L
27	pufM	plus	WP_008296327.1	KT71_RS06100	1314825..1315802	325	photosynthetic reaction center, subunit M
28	pufC	plus	WP_238549457.1	KT71_RS06105	1315799..1316890	363	photosynthetic reaction center, cytochrome
24	pufB	plus	WP_008296325.1	KT71_RS20010	1317037..1317180	47	light-harvesting protein
25	pufA	plus	WP_023660414.1	KT71_RS06110	1317251..1317442	63	light-harvesting protein B-875, alpha chain
30	idi	plus	WP_008296323.1	KT71_RS06115	1317602..1318252	216	isopentenyl-diphosphate delta-isomerase
x	hemN	minus	WP_008296322.1	KT71_RS06120	RC_1318359..1319702	447	oxygen-independent coproporphyrinogen III oxidase
48	puhE	minus	WP_008296321.1	KT71_RS06125	RC_1319950..1320777	275	photosynthetic complex assembly protein
45	puhC	minus	WP_023660415.1	KT71_RS06130	RC_1320774..1321283	169	photosynthetic complex assembly protein
44	puhB	minus	WP_008296319.1	KT71_RS06135	RC_1321305..1321964	219	PH domain-containing protein
43	puhA	minus	WP_023660416.1	KT71_RS06140	RC_1321961..1322728	255	photosynthetic reaction center, subunit H
42	pucC2	minus	WP_008296317.1	KT71_RS06145	RC_1322756..1324183	475	PucC family protein
41	bchM	minus	WP_008296316.1	KT71_RS06150	RC_1324180..1324881	233	magnesium protoporphyrin IX methyltransferase
40	bchL	minus	WP_008296315.1	KT71_RS06155	RC_1324881..1325798	305	ferredoxin:protochlorophyllide reductase (ATP-dependent), iron-sulfur ATP-binding protein
39	bchH	minus	WP_008296314.1	KT71_RS06160	RC_1325795..1329553	1252	magnesium chelatase subunit H
38	bchB	minus	WP_008296313.1	KT71_RS06165	RC_1329525..1331099	524	ferredoxin:protochlorophyllide reductase (ATP-dependent), subunit B
37	bchN	minus	WP_008296312.1	KT71_RS06170	RC_1331103..1332398	431	ferredoxin:protochlorophyllide reductase (ATP-dependent), subunit N
36	bchF	minus	WP_023660417.1	KT71_RS06175	RC_1332395..1332913	172	2-vinyl bacteriochlorophyllide hydratase
34	ppsR	plus	WP_008296310.1	KT71_RS06180	1333195..1334559	454	transcriptional regulator PpsR
33	bchG	plus	WP_008296309.1	KT71_RS06185	1334691..1335605	304	bacteriochlorophyll synthase 33 kDa chain
32	pucC1	plus	WP_008296308.1	KT71_RS06190	1335602..1336960	452	PucC family protein
31	bchP	plus	WP_040362893.1	KT71_RS06195	1336968..1338164	398	geranylgeranyl diphosphate reductase
x	x	plus	WP_008296306.1	KT71_RS06200	1338219..1338494	91	hypothetical protein
47	acsF	minus	WP_008296305.1	KT71_RS06205	RC_1338590..1339654	354	magnesium-protoporphyrin IX monomethyl ester aerobic oxidative cyclase
x	x	plus	WP_023660419.1	KT71_RS06210	1339856..1340341	161	BLUF domain-containing protein
x	x	minus	WP_008296303.1	KT71_RS06215	RC_1340467..1342950	827	hypothetical protein
x	x	minus	WP_008296302.1	KT71_RS06220	RC_1343229..1344458	409	Nramp family divalent metal transporter
Photosynthesis genes (unclustered) - Congregibacter litoralis DSM 17192
No	Gene	Strand	Accession	Locus Tag	Range (original)	Size (AA)	Protein
x	x	minus	WP_023660294.1	KT71_RS17530	RC_3861491..3862183	230	hypothetical protein
x	x	plus	WP_023660295.1	KT71_RS17535	3862390..3870336	2648	DUF11 domain-containing protein
16	crtD	minus	WP_008293996.1	KT71_RS17540	RC_3870442..3871926	494	phytoene desaturase family protein		Singleton
x	x	minus	WP_008293995.1	KT71_RS17545	RC_3871923..3872666	247	hypothetical protein
x	x	plus	WP_008293994.1	KT71_RS17550	3872720..3874132	470	cytochrome P450
x	x	minus	WP_008292667.1	KT71_RS04360	RC_950947..951756	269	polyprenyl synthetase family protein
x	xseB	minus	WP_008292666.1	KT71_RS04365	RC_951809..952036	75	exodeoxyribonuclease VII small subunit
29	dxs1	minus	WP_008292665.1	KT71_RS04370	RC_952152..954092	646	1-deoxy-D-xylulose-5-phosphate synthase		Singleton
x	x	minus	WP_023659953.1	KT71_RS04375	RC_954160..954885	241	Lysophospholipase L1
x	x	plus	WP_238549455.1	KT71_RS04380	955009..956223	404	GGDEF domain-containing protein
x	x	minus	WP_008293024.1	KT71_RS02675	RC_570715..571638	307	3-keto-5-aminohexanoate cleavage protein	MTSPSVAGKPLIIEASLNGAASKALNPAVPYSDDEIVADAVACM EAGAALIHNHSDEPIIGGSGELDTERYARPWRRLLALRPDAILTPTMPVGQEGVPVET RYKHVEEMATEGLLAQGLVDPGTFNLSLLDEEGLFAPSEYLYRNDMTDSRYYVEACRR HNIGMSVSIFEPGFLKFILAYHRAGKLPRGSMIKLYFASDELPFGMPPTATSLDAYLG MLGDWEVPWLVSSFGDDCAGCGLAEAAIARGGHVQVGLEPYGGERTPTNVELVKEVVE IARRYERPIATPAEAAKMLDLPTYPVSFRQH	x
x	def	minus	WP_008293023.1	KT71_RS02680	RC_571681..572190	169	peptide deformylase	MAILDIIEVPDERLREHSEAVSRFDEALQQQVNDLFETLGHSGA IGLSAPQTGIFKRIIVVHVPDDDFGARVYINPEILKRSKSRYVEESCLSVPGIEGNVV RCIRVKLRAQDIHGKLCEFDVDDLHAVCVQHEVDHLDGILFTDRLSWFKKLRLRMASG GNTGLSRAA	x
62	pucC3	minus	WP_023659855.1	KT71_RS02685	RC_572191..573624	477	light-harvesting complex assembly protein PucC3	MNRFDRKLISLWSSLGSHCMPFADVATPDLPLRRLLRLSLFQIS VGMAMVLLVGTLNRVMIVELNVPASIVGVMLAMPLIFAPLRALIGFRSDNHQSALGWR RVPFVWKGSLAQFGGFSIMPFALLVLAGEGLSGSVSPWVGQVAAAASFLLVGAGIHTV QTAGLALATDLTPEESHPRVVGLMYVMLLVGMMISALIFGTVLIDFSPGRLVQVIQMA ALLTLVLNVTAVWKQEARRPQRGAVTVAPDPSFKEAWLKFCEGEHTYRRLAIVGMGTM AFGMADILLEPFGGHVLNLSVSSTTLLTALFAVGGLVGFGAASKAIGDGMDPYVATRI GAFIGLPAFALVITAAPLLNPWLFVIGNFLVGFGGALFGHGTLTSTMSRAPREQAGLA …	x
61	pucA	minus	WP_023659856.1	KT71_RS02690	RC_573703..573846	47	light-harvesting protein B-800/850, alpha chain	MNNGKLWTVVNPTVGIPLMLGGVAVIALTVHFAILNNTTWFAAY WGG	x
60	pucB	minus	EAQ98195.1	KT71_03072	RC_573857..574009	50	light-harvesting protein B-800/850, beta chain	MENGEKVFPTGLTIRESEEVHKYIIDGTRVFFVIALVAHALAYT LTPWLG	absent in automated NCBI annotation update!
x	x	minus	ESZ89386.1	KT71_000548	RC_574164..574403	79	hypothetical protein	MTGFPAASMIGTQGSHGPLTIAENNPGALSDSGFFLCIFNHLAS VYFSIALFGIATNSRAATLLAAAARKFAPGTRSTP	absent in automated NCBI annotation update!
x	x	minus	WP_008293019.1	KT71_RS02700	RC_574440..575165	241	hypothetical protein	MLVARLYDDEGRARAAAQALVEVGYSSNDVAVMEGPKAAPQMTG EASAEEAPAASPDTRAVSHAVRVGSMLGEHAEFYMSRLTEGRTLVIATPPFIASRMVE VILDEHDPLPDSHVPAPEPFVPLSEQATPLSNMLGLPTLANGTMSEALGFSLKQDGLS HLSRWFKPLASDFTFSSMVGWKIKSSSDTPLSSLLKLPLKSNRLEGKNSSFGLPLQSK SDTPLSSMLGLPLLSKRDHYLYS	x
x	x	minus	WP_023659858.1	KT71_RS20845	RC_575276..575725	149	amidohydrolase family protein	MIPASCPFCEEAQRLGIVVFFHGGRAGIEPESSQPFAVPRHYAR VLEDFPRLQVILGHAGARDSDAMVDLAAKHENAWIGIHGQGVTSLDGIIKKTGGERLL FGTDWPWYHLGATLAKVLITTDSPQRSSIRDAILRKNAATLFPELLS	x
PGC proteins of Rhodobacterales without homologs in Congregibacter litoralis DSM 17192
No	Gene	Strand	Accession	Locus Tag	Range (original)	Size (AA)	Protein
23	pufQ	x	x	x	x	x	protein pufQ
04	crtA	x	x	x	x	x	spheroidene monooxygenase
13	crtK	x	x	x	x	x	CrtK protein
49	hemA	x	x	x	x	x	5-aminolevulinic acid synthase
35	ppaA	x	x	x	x	x	regulatory protein Ppa
46	PS gene	x	x	x	x	x	hypothetical protein
50	cycA	x	x	x	x	x	cytochrome c-551
63	pucDE	x	x	x	x	x	light-harvesting protein B-800/850, gamma chain		x
x	prk	x	x	x	x	x	phosphoribulokinase
x	rbcL	x	x	x	x	x	ribulose-bisphosphate carboxylase

## Sheet: Table S6F PGC-Dinoroseobacter
Table S6F: Photosynthesis gene cluster of Dinoroseobacter shibae DFL 12 = DSM 16493 (T)
Order of genes in the PGC and localization on the plus and minus strand. The color code and numbering of proteins is corresponding to those of Dinoroseobacter shibae DSM 16493 (Brinkmann et al. 2018). Protein accession numbers are highlighted in blue, corresponding locus tags are shown in black.
Photosynthesis Gene Cluster (PGC) - Dinoroseobacter shibae DSM 16493 (Chromosome; 3,789,584 bp [NC_009952.1]).
No	Gene	Strand	Accession	Locus Tag	Range	Size (AA)	Protein
x	x	plus	WP_012180153.1	Dshi_3496	3677660..3678262	200	L,D-transpeptidase
x	x	plus	WP_044028134.1	Dshi_3497	3678642..3678818	58	hypothetical protein
01	hemH	minus	WP_044029134.1	Dshi_3498	RC_3678932..3679987	351	ferrochelatase
02	x	minus	WP_012180155.1	Dshi_3499	RC_3680013..3680882	289	hypothetical methyltransferase
03	comF	plus	WP_012180156.1	Dshi_3500	3680913..3681689	258	double zinc ribbon domain-containing protein
04	crtA	plus	WP_157865433.1	Dshi_3501	3681752..3682489	245	spheroidene monooxygenase
05	bchI	plus	WP_012180158.1	Dshi_3502	3682486..3683490	334	magnesium-chelatase 38 kDa subunit
06	bchD	plus	WP_050757914.1	Dshi_3503	3683517..3685220	567	magnesium-chelatase 60 kDa subunit
07	bchO	plus	WP_012180160.1	Dshi_3504	3685217..3686125	302	magnesium-chelatase 30 kDa subunit
08	x	minus	WP_012180161.1	Dshi_3505	RC_3686122..3686574	150	hypothetical regulatory protein MarR family
09	x	minus	WP_012180162.1	Dshi_3506	RC_3686571..3687404	277	hypothetical protein
10	grxC	minus	WP_012180163.1	Dshi_3507	RC_3687404..3687661	85	glutaredoxin-3
11	crtI	plus	WP_012180164.1	Dshi_3508	3687777..3689351	524	phytoene dehydrogenase
12	crtB	plus	WP_012180165.1	Dshi_3509	3689348..3690433	361	phytoene synthase
13	crtK	plus	WP_012180166.1	Dshi_3510	3690440..3690922	160	CrtK protein
14	x	minus	WP_012180167.1	Dshi_3511	RC_3690919..3691104	61	outer membrane beta-barrel protein
15	crtC	minus	WP_157865434.1	Dshi_3512	RC_3691117..3691959	280	hydroxyneurosporene dehydrogenase
16	crtD	minus	WP_044029145.1	Dshi_3513	RC_3691944..3693527	527	phytoene desaturase family protein
17	crtE	plus	WP_012180170.1	Dshi_3514	3693641..3694519	292	geranylgeranyl pyrophosphate synthetase
18	crtF	plus	WP_245533092.1	Dshi_3515	3694640..3695653	337	hydroxyneurosporene methyltransferase
19	bchC	plus	WP_012180172.1	Dshi_3516	3695777..3696715	312	2-desacetyl-2-hydroxyethyl bacteriochlorophyllide A dehydrogenase
20	bchX	plus	WP_012180173.1	Dshi_3517	3696712..3697719	335	chlorophyllide a reductase iron protein subunit X
21	bchY	plus	WP_044029148.1	Dshi_3518	3697860..3699359	499	chlorophyllide a reductase subunit Y
22	bchZ	plus	WP_012180175.1	Dshi_3519	3699577..3701043	488	chlorophyllide a reductase subunit Z
23	pufQ	plus	WP_012180176.1	Dshi_3520	3701062..3701286	74	protein pufQ
24	pufB	plus	WP_012180177.1	Dshi_3521	3701410..3701559	49	light-harvesting protein
25	pufA	plus	WP_012180178.1	Dshi_3522	3701573..3701734	53	light-harvesting protein B-875, alpha chain
26	pufL	plus	WP_012180179.1	Dshi_3523	3701883..3702722	279	photosynthetic reaction center, subunit L
27	pufM	plus	WP_012180180.1	Dshi_3524	3702726..3703718	330	photosynthetic reaction center, subunit M
28	pufC	plus	WP_012180181.1	Dshi_3525	3703718..3704800	360	photosynthetic reaction center, cytochrome
29	dxs1	plus	WP_044029151.1	Dshi_3526	3704981..3706909	642	1-deoxy-D-xylulose-5-phosphate synthase
30	idi	minus	WP_012180183.1	Dshi_3527	RC_3707023..3707553	176	isopentenyl-diphosphate delta-isomerase
31	bchP	minus	WP_012180184.1	Dshi_3528	RC_3707550..3708734	394	geranylgeranyl diphosphate reductase
32	pucC1	minus	WP_012180185.1	Dshi_3529	RC_3708748..3710049	433	PucC family protein
33	bchG	minus	WP_012180186.1	Dshi_3530	RC_3710051..3710956	301	bacteriochlorophyll synthase 33 kDa chain
34	ppsR	minus	WP_012180187.1	Dshi_3531	RC_3711054..3712484	476	transcriptional regulator PpsR
35	ppaA	minus	WP_083768409.1	Dshi_3532	RC_3712527..3713519	330	regulatory protein Ppa
36	bchF	minus	WP_012180189.1	Dshi_3533	3713645..3714133	162	2-vinyl bacteriochlorophyllide hydratase
37	bchN	plus	WP_012180190.1	Dshi_3534	3714130..3715413	427	ferredoxin:protochlorophyllide reductase (ATP-dependent), subunit N
38	bchB	plus	WP_012180191.1	Dshi_3535	3715410..3716996	528	ferredoxin:protochlorophyllide reductase (ATP-dependent), subunit B
39	bchH	plus	WP_012180192.1	Dshi_3536	3716986..3720570	1194	magnesium chelatase subunit H
40	bchL	plus	WP_012180193.1	Dshi_3537	3720602..3721501	299	ferredoxin:protochlorophyllide reductase (ATP-dependent), iron-sulfur ATP-binding protein
41	bchM	plus	WP_012180194.1	Dshi_3538	3721548..3722231	227	magnesium protoporphyrin IX methyltransferase
42	pucC2	plus	WP_012180195.1	Dshi_3539	3722228..3723673	481	PucC family protein
43	puhA	plus	WP_012180196.1	Dshi_3540	3723698..3724468	256	photosynthetic reaction center, subunit H
44	puhB	plus	WP_012180197.1	Dshi_3541	3724493..3725170	225	PH domain-containing protein
45	puhC	plus	WP_012180198.1	Dshi_3542	3725184..3725663	159	photosynthetic complex assembly protein
46	PS gene	plus	WP_012180199.1	Dshi_3543	3725667..3725963	98	hypothetical protein
47	acsF	plus	WP_157865436.1	Dshi_3544	3726035..3727081	348	magnesium-protoporphyrin IX monomethyl ester aerobic oxidative cyclase
48	puhE	plus	WP_012180201.1	Dshi_3545	3727081..3727878	265	photosynthetic complex assembly protein
49	hemA	plus	WP_012180202.1	Dshi_3546	3728081..3729295	404	5-aminolevulinic acid synthase
50	cycA	plus	WP_012180203.1	Dshi_3547	3729391..3729831	146	cytochrome c-551
x	x	plus	WP_012180204.1	Dshi_3548	3729973..3731778	601	ABC transporter ATP-binding protein/permease
x	x	plus	WP_012180205.1	Dshi_3549	3731871..3733085	404	glycerophosphoryl diester phosphodiesterase
Further photosynthesis-related genes of Dinoroseobacter shibae DSM 16493 (Chromosome; 3,789,584 bp [NC_009952.1]).
No	Gene	Strand	Accession	Locus Tag	Range	Size (AA)	Protein
x	x	minus	WP_044027916.1	Dshi_2634	RC_2790528..2791004	158	hypothetical protein
x	x	plus	WP_162017714.1	Dshi_2635	2791140..2791742	200	pentapeptide repeat-containing protein
51	bchJ	minus	WP_012179297.1	Dshi_2636	RC_2791785..2792408	207	bacteriochlorophyll 4-vinyl reductase
52	bchE	minus	WP_012179298.1	Dshi_2637	RC_2792408..279405	547	magnesium-protoporphyrin IX monomethyl ester anaerobic oxidative cyclase
x	x	minus	WP_012179299.1	Dshi_2638	RC_2794120..2794332	70	hypothetical protein
x	carB	plus	WP_012179300.1	Dshi_2639	2794515..2797832	1105	carbamoyl-phosphate synthase large subunit
x	x	minus	WP_012179556.1	Dshi_2895	RC_3050467..3051603	378	FAD-binding protein
x	x	minus	WP_012179557.1	Dshi_2896	RC_3051689..3053131	480	FAD-linked oxidase C-terminal domain-containing protein
63	pucDE	minus	WP_012179558.1	Dshi_2897	RC_3053287..3053973	228	light-harvesting protein B-800/850, gamma chain
62	pucC3	minus	WP_012179559.1	Dshi_2898	RC_3054022..3055425	467	light-harvesting complex assembly protein PucC3
61	pucA	minus	WP_012179560.1	Dshi_2899	RC_3055496..3055837	113	light-harvesting protein B-800/850, alpha chain
60	pucB	minus	WP_012179561.1	Dshi_2900	RC_3055850..3056005	51	light-harvesting protein B-800/850, beta chain
x	x	minus	WP_012179562.1	Dshi_2901	RC_3056406..3058565	719	esterase-like activity of phytase family protein
x	x	plus	WP_050757902.1	Dshi_2902	3058724..3059089	121	hypothetical protein
PucBACDE gene cluster - Rhodobacter capsulatus DSM 938 (Contig: 47,883 bp [NZ_FNAY01000022.1]; Tichy et al. 1991).
No	Gene	Strand	Accession	Locus Tag	Range	Size (AA)	Protein
x	preA	minus	WP_074555790.1	BLQ25_RS15485	RC_166..1467	433	NAD-dependent dihydropyrimidine dehydrogenase subunit PreA
x	x	minus	WP_074555792.1	BLQ25_RS15490	RC_1469..2800	443	NAD(P)-dependent oxidoreductase
60	pucB	plus	WP_013068239.1	BLQ25_RS15495	3625..3774	49	light-harvesting protein B-800/850, beta chain
61	pucA	plus	WP_013068240.1	BLQ25_RS15500	3795..3977	60	light-harvesting protein B-800/850, alpha chain
62	pucC3	plus	WP_074555794.1	BLQ25_RS15505	4074..5462	462	light-harvesting complex assembly protein PucC3
63	pucDE	plus	WP_055212602.1	BLQ25_RS15510	5526..6224	232	light-harvesting protein B-800/850, gamma chain
x	cysA	minus	WP_074555796.1	BLQ25_RS15515	RC_6562..7281	239	sulfate ABC transporter ATP-binding protein
x	cysW	minus	WP_074555798.1	BLQ25_RS15520	RC_7290..8153	287	sulfate ABC transporter permease subunit CysW
